# Supplementary material
Source: Research Square preprint supplement (doi:10.21203/rs.3.rs-9087825/v1)
Supplement: Supplementary file 1 [file 5adf443adfad88525f55742f.xlsx]

## Sheet: Table_S1
Additional file 1: Supplementary Table S1. Sequencing output and results of the cleaning and mapping steps for the 6 samples, 3 I-DWV and 3 N-DWV
Sample	Treatment		Raw reads	Cleaned and trimmed reads	Uniquely mapped reads number	Percentage
m_3	i-DWV	1	24401611	22327246	19850637	0.889077		i-DWV	Inoculated with viral suspenssion
		2	24401611	22327246	19850637	0.889077		n-DWV	non inoculated with the viral suspenssion
m_17	i-DWV	1	23253588	21228188	16462410	0.775498
		2	23253588	21228188	16462410	0.775498
m_18	i-DWV	1	23620197	21507978	19990037	0.929424
		2	23620197	21507978	19990037	0.929424
m_15	n-DWV	1	24285535	22091213	20775694	0.940451
		2	24285535	22091213	20775694	0.940451
m_20	n-DWV	1	22725290	20720695	19450594	0.938704
		2	22725290	20720695	19450594	0.938704
m_21	n-DWV	1	27424695	24974568	23490950	0.940595
		2	27424695	24974568	23490950	0.940595
Average			2.42852e+07	22141648	20003387	0.902291

## Sheet: Table_S2
DESeq2_svalue
	baseMean	log2FoldChange	lfcSE	stat	pvalue	padj	svalue
LOC551580	301.598990779037	0.199109915263938	0.180634731959292	1.10227924111964	0.270340291333352	NA	0.327355851859961
LOC551555	1980.07753271854	-0.366137951256644	0.151704437976324	-2.4134953211704	0.0158003307475459	0.123612677668188	0.106738557981141
LOC726347	150.988225456033	-0.208474776354632	0.207650038557633	-1.00397176808985	0.315392221722328	NA	0.352193949898362
Rfwd3	577.439714018101	-0.30275445949007	0.163875968692297	-1.84746099080909	0.0646803567569866	0.233257565646874	0.178901701166833
LOC726145	841.770711706325	0.18805001968136	0.138264152273123	1.36007791310861	0.17380526962987	0.37284258941084	0.268497328725591
LOC551448	578.608464179084	-0.0358273379875306	0.143491591979472	-0.249682490055975	0.80283290031978	0.89588806301426	0.547393849084119
LOC410665	209.200101265194	-0.0165747089317527	0.199248119214701	-0.0831862754693935	0.9337034255026	NA	0.582606471348494
LOC408567	1180.07641493185	-0.306650765215956	0.222266436147443	-1.37965394384843	0.167693219777023	0.365886243607663	0.264321109388015
LOC107964061	846.79534938968	0.181373445675667	0.154670690223371	1.17264263457888	0.240939144710927	0.44631304024524	0.310671256262021
LOC726450	2344.60829145992	0.115575006622022	0.137942444522605	0.837849488763287	0.402115240341756	0.59825457666333	0.395832616232803
LOC113219111	183.805077570818	0.286900076514063	0.187495162774134	1.53017321764016	0.125973858812523	NA	0.233039202197937
LOC410664	341.536167344917	0.180895680859851	0.15539953162346	1.16406837890715	0.244396301996745	NA	0.31187245393767
LOC408565	1602.45173489554	-0.504213411381547	0.161429750853634	-3.1234230909438	0.00178760577024053	0.064020872800545	0.0544436714820918
LOC410663	187.611409495498	0.532401969114511	0.206287932900116	2.58086821477967	0.00985521950430764	NA	0.0917123945390962
LOC726544	1570.77646314764	0.343991805201234	0.145709049793487	2.36081290550431	0.0182349276652637	0.130612448430165	0.111846429327517
Mir2-3	26.1304691665101	1.08440826077793	0.386810454235006	2.80346161512765	0.00505572499716582	NA	0.0773804966001896
LOC410772	214.689789758199	0.187242705932745	0.175142599065521	1.06908717200604	0.285030391398182	NA	0.334661337769807
LOC551203	1243.68080037354	-0.0629783636728659	0.165511084898453	-0.380508433688931	0.703568037352622	0.82497769867272	0.512947619089673
LOC100578621	3639.8338252346	0.319536133686029	0.201779082852239	1.58359394427431	0.113286152890671	0.300481659041719	0.222477479078472
LOC726446	29.5660697261841	0.649064096073676	0.40943228499519	1.58527824956769	0.112903128595031	NA	0.222293836260329
LOC100578600	3663.77050178993	0.541042527855898	0.192971011552714	2.80375028094881	0.00505120109376185	0.0866217878641988	0.0773804966001896
LOC410771	3214.96481107485	0.432584739469817	0.170172478129747	2.54203702163869	0.0110208499476351	0.108639341861686	0.0936471548641946
LOC100577692	557.089315434585	0.403737649033337	0.183565900941731	2.19941528879863	0.027848406501958	0.158832987260785	0.130215801381477
LOC410769	3619.22370040655	0.349844785749444	0.148478210738267	2.35620286646733	0.0184628316834149	0.131010372381207	0.112353850891432
Emc	5245.88853144938	0.481392310392822	0.185837987989199	2.59038701183528	0.00958680866361868	0.106491538304407	0.0917123945390962
LOC726756	557.77085793186	-0.119183666433964	0.169177245367976	-0.704489934061334	0.4811277165099	0.665384782935284	0.431547264780366
Nedd9	642.828061454199	0.012103417842417	0.157060062955445	0.0770623519096036	0.938573942726572	0.969943481195054	0.583182714323109
LOC726609	2912.816591026	-0.0286117797475349	0.126988710695501	-0.225309632571524	0.821738406606095	0.906961911917556	0.553004783761495
LOC726788	167.455866390902	0.0341060114579356	0.195159112222516	0.1747600256505	0.86126819979168	NA	0.563937134947196
LOC100578031	705.213804940809	-0.007104368411465	0.167055469679254	-0.0425270027081746	0.966078586169298	0.981678731838777	0.589713478689976
LOC410766	729.16214092557	-0.15526779681241	0.150434993061852	-1.03212552912188	0.302013315868636	0.507405331065731	0.344757459551437
LOC551646	233.842762790269	-0.462310064073934	0.211625227447991	-2.18456972095896	0.0289204100520174	NA	0.132151031220468
LOC113219417	101.112517794431	-0.0563419980872968	0.235156178528752	-0.239593951729437	0.81064505404669	NA	0.549330075122454
LOC113219404	1100.11103327294	-0.570440718208467	0.210716825319681	-2.70714366232049	0.00678648824884001	0.0977573187455778	0.0862886170265971
LOC551678	905.451528402981	0.346103480809191	0.234208844000891	1.47775581355875	0.139473149268886	0.331468206965245	0.24246175319335
LOC726886	295.455217881998	0.0292439890899208	0.159856810183738	0.182938650260242	0.854846156078404	NA	0.562591933106719
LOC100577848	38.5547821337354	-0.229015792103648	0.309022683879005	-0.741097026370133	0.458634612488546	NA	0.421892351307213
LOC408626	1139.14827113463	0.129644775786847	0.134734013826403	0.962227518538021	0.335935328809681	0.53851751302076	0.36328282316088
LOC726912	52.6943404797839	0.35203016380117	0.281319897842736	1.25135181158768	0.210806150163736	NA	0.290726855226334
LOC100576602	175.627708303456	0.239134359119028	0.226473214830796	1.0559057030108	0.291011298345477	NA	0.338271723145945
LOC100576700	2357.1294112347	-0.137021881414016	0.280959595076428	-0.487692478972795	0.625767679826542	0.776312635325248	0.487283536919113
LOC102653619	123.243105984666	0.292699257987965	0.324731691122744	0.9013572311836	0.367398413472629	NA	0.380211486179136
LOC724948	521.881756250276	-0.396770227810263	0.221608709546062	-1.79040899891975	0.0733881847061949	0.246253089640107	0.187834442320672
LOC100576789	64.9843424768689	0.00111748145697797	0.289464037030915	0.00386051914579849	0.996919759028003	NA	0.597432317500746
LOC113219394	382.778519623788	-0.121865465931102	0.212916789839105	-0.57236193549223	0.567076797968691	NA	0.466827855471303
LOC724874	504.002111013024	0.413917823066643	0.289563215226534	1.42945581932022	0.152873264659079	NA	0.253240023853916
Glob1	1994.36233627239	0.430486371565186	0.222087923746988	1.93836010667385	0.0525793039385957	0.213885622973874	0.165761049505946
LOC410763	415.046894647362	-0.045900257346718	0.156632979131985	-0.293043378227778	0.769488995302713	NA	0.536872013098112
LOC100576088	390.377814051484	0.279109929647905	0.155340720167885	1.7967595962363	0.0723737932008854	NA	0.186624309536971
LOC113219396	781.649347644372	-0.587143968262728	0.306664661366285	-1.91461241620349	0.055541950508871	0.2194840246987	0.170240751754209
LOC408625	143.958184013331	-0.379730542242886	0.197262282810018	-1.92500328412301	0.054228947385194	NA	0.168167804371079
LOC113218523	1024.20172629399	-0.158747205235762	0.145380088520176	-1.09194599378533	0.274856839847176	0.481146159028607	0.32958096759858
LOC724679	135.960701350688	0.0892466894729862	0.256542355748723	0.347882864069437	0.727928154922962	NA	0.521871479496666
LOC102654998	110.171183766841	0.210049617664338	0.210909187805119	0.995924453791104	0.319286852742076	NA	0.35413016645903
LOC409327	1301.17489282268	-0.094113423053769	0.186284807585436	-0.505212552078921	0.613409555116454	0.767158528764819	0.482650923531964
LOC724537	388.451317851506	-0.313637732526392	0.205205355392674	-1.52840909988058	0.126410996879656	NA	0.233372906043532
LOC409620	708.679058823674	-0.150081944224381	0.146433205309328	-1.02491742844354	0.305402150325491	0.509352240729318	0.345783676043737
LOC100577325	649.015815948957	0.047361196333927	0.167197437466213	0.2832650849897	0.776973639766287	0.878089417976372	0.539174522484994
LOC551204	203.67503961155	-0.215461873467394	0.200927253439911	-1.0723377231244	0.283568368978749	NA	0.333603381145885
LOC724372	145.633095460345	-0.0294070555037587	0.214198375407881	-0.137288882083075	0.890802458037284	NA	0.571399834988482
LOC725343	5334.32210521337	0.0166931824294318	0.190857679768357	0.0874640331460188	0.93030267322782	0.967525589231477	0.581682876272266
LOC725306	1434.3898018156	-0.178490741170729	0.159876399467818	-1.11642957787937	0.264238298621589	0.469636795994653	0.323343210864379
LOC409930	3444.17946672503	0.270620712658986	0.164317908972675	1.64693376608139	0.0995716605515097	0.282390692432825	0.211745447755271
LOC409931	1468.08233741543	0.238728959858591	0.13089198061637	1.82386238434484	0.0681728796838017	0.238018398687906	0.181508497193767
LOC100578066	266.651821550996	-0.332924668849411	0.339717803040313	-0.980003596720259	0.327084343249124	NA	0.358857525172789
LOC411665	231.015933023476	0.145680952378956	0.204667092910789	0.711794701859845	0.476591914006073	NA	0.429883624506119
LOC100578187	86.4410529600615	-0.181475982412237	0.261374704577316	-0.694313486478013	0.48748563509164	NA	0.43345584616778
LOC100578245	122.089885998505	-0.0260123007016137	0.212567285872612	-0.122372079009385	0.90260435002014	NA	0.574614251009486
LOC409852	22466.7383546176	0.00901955247449979	0.166158424859989	0.0542828477225875	0.956709814937725	0.977307398028604	0.58721636248623
LOC413835	2859.40707186175	0.202077217505039	0.149348152481336	1.35306138139401	0.176036021756929	0.375601182539846	0.27039487048887
LOC413834	1812.78366202731	-0.178626217022484	0.166368504304185	-1.07367808450022	0.282966987052144	0.488331739976315	0.333123980726803
LOC409999	85.9733521073285	-0.258404313218811	0.230341608266213	-1.1218308110455	0.26193438316092	NA	0.321688883400556
LOC727331	1132.80248277777	-0.305465582566054	0.177867745061942	-1.71737479698569	0.0859107135463406	0.26474401576878	0.200323319060871
LOC412118	947.392508437467	-0.321843295191632	0.211194962863147	-1.52391558410503	0.127529799962029	0.320800045637786	0.234493405471514
LOC726902	1252.78659943105	-0.00028993356393347	0.135395176265252	-0.00214138769143048	0.998291421128108	0.999211929584657	0.597665766722192
LOC552064	644.452134028979	-0.417919193417987	0.160804190072433	-2.59893223696309	0.00935142312824325	0.106491538304407	0.0917123945390962
LOC409479	6555.23890685329	-0.365056629272767	0.151141745566172	-2.41532627471833	0.0157211200194109	0.123437799501415	0.106617929616471
Tpcn1	556.724997108985	-0.18441958669856	0.182783232436958	-1.00895243091932	0.312997448203196	0.517480709330029	0.350741084203198
LOC552163	875.438146066242	-0.167818949665027	0.140120158653493	-1.19767884419851	0.231042068449321	0.435032376932763	0.303362857898422
LOC727019	114.727592131574	-0.283331381523079	0.240480732927446	-1.17818745008799	0.238721884656281	NA	0.308971174385453
LOC100578696	327.929554014268	0.0724139421858984	0.167131509027089	0.433275225045454	0.664814834556489	NA	0.499236672752202
LOC412925	894.955836847353	0.321977506673775	0.27234618517718	1.18223615456301	0.237112010658374	0.44199286668463	0.30814155934197
LOC411675	324.344262324136	-0.453680488474654	0.255742848879446	-1.77397135623727	0.0760678883897028	NA	0.190152601076599
LOC411808	918.538449292358	-0.0584426576368983	0.146174922528715	-0.399813159643833	0.689294137369463	0.817513014055779	0.508153702483353
LOC725638	209.239488654338	-0.436645005219868	0.18257664110959	-2.39157102774049	0.0167764375247534	NA	0.109382956255365
LOC724901	896.394879958367	-0.249102571047406	0.141826370646095	-1.75639107108651	0.079021656403363	0.253032472052656	0.192372088554698
LOC551574	2333.32529279416	-0.0600499551611954	0.127285422219639	-0.471774018689867	0.637088097668089	0.784912831063533	0.491756018445718
LOC412610	302.963808299787	-0.232948658599909	0.174148208371848	-1.3376460244857	0.181011853735256	NA	0.273788851187356
LOC413784	1160.9624849242	-0.162250571885484	0.163417282421518	-0.992860543764122	0.320777920246051	0.525195222363632	0.35489704515523
LOC102655618	273.885858923852	-0.299905331305428	0.208667326577454	-1.43724145137839	0.150649398606041	NA	0.25169756634513
LOC412473	416.69246638551	-0.0453257878687554	0.19615503118696	-0.231071248055597	0.817259451432497	NA	0.551345117411615
LOC550706	1405.26686620457	-0.108473086089948	0.142873349868231	-0.75922546920045	0.447717692885087	0.638001385791614	0.417088895643183
LOC725378	371.295190329055	-0.455082409175271	0.193805324744391	-2.34814192941023	0.0188673303797057	NA	0.113211484195747
egh	360.02884798786	0.00125989266834763	0.159949269737126	0.00787682663645947	0.993715266627465	NA	0.59649822039453
LOC725884	3675.42874183534	0.18036762712991	0.274318724012662	0.65751117711376	0.510852286521462	0.691218643838014	0.444730747429492
LOC550716	3714.49734568093	-0.6494842026779	0.249960288866961	-2.59834954432934	0.00936730854212011	0.106491538304407	0.0917123945390962
LOC727419	139.113396111635	-0.00207624431882706	0.199942987543453	-0.0103841817326844	0.991714770620267	NA	0.596182301642367
LOC408624	596.167026294522	-0.437772719893224	0.214295960257893	-2.04284168197286	0.041068112878072	0.190244510615014	0.150026284845763
LOC551279	1207.58258743957	-0.164073564711193	0.164010891473577	-1.00038212851021	0.317125615371062	0.52137804692963	0.353299482478094
LOC724238	166.220380591844	-0.220171179460069	0.233686304489279	-0.942165523740269	0.346107901980954	NA	0.368743849913727
LOC107964165	73.8140358756879	0.600629849033186	0.261321932957535	2.29842877035044	0.0215373976090071	NA	0.119960428437025
LOC724331	207.142626138947	-0.110934172792151	0.177934527135266	-0.623455012235027	0.532985556786544	NA	0.453017701929633
LOC551450	1112.28578992101	0.138140012310166	0.159086956383575	0.868330222982558	0.385213581453269	0.585848466084096	0.38911489936086
LOC100578309	37.1936077028539	-0.292924581443095	0.338272599945799	-0.865942383421032	0.386521758907541	NA	0.389642168883669
LOC552162	155.126520405026	-0.477138676965867	0.207557523489108	-2.29882621908864	0.0215148093454199	NA	0.119960428437025
LOC726235	108.594570724799	-0.451352111045348	0.223420837005403	-2.02018807688216	0.0433638825611617	NA	0.153410190328371
LOC412000	311.749570687789	-0.422386557874456	0.190427723384578	-2.21809382776385	0.0265484355815962	NA	0.127406432535046
LOC726291	630.37961991736	-0.122708247594691	0.144770802277999	-0.847603561380135	0.396658790301506	0.595330960072291	0.394024560354452
LOC100578472	228.26287920096	-0.0511775972629335	0.19374867518792	-0.264144243635707	0.791668772669376	NA	0.543565269274618
LOC726316	827.149648933036	0.243830470548627	0.204751353928422	1.19086133434735	0.233708025817075	0.438152093306451	0.305612011665892
LOC411985	1034.34171877933	-0.378085314057334	0.16886131122022	-2.2390286521242	0.0251540519359438	0.150518920143525	0.124935206877794
LOC412578	190.512693581881	-0.105355501913771	0.178807056512638	-0.589213334018082	0.555718173505139	NA	0.462391028097797
LOC102655778	343.147824012668	-0.0802473468048271	0.178065835629437	-0.450661108129835	0.652233816899713	NA	0.495921394415933
LOC725647	14433.4630464886	0.0605172368386766	0.184652409663138	0.327735971326224	0.743111303003227	0.85449927903602	0.527224032866098
LOC412834	1014.31237268368	-0.0242443092383094	0.163380058025811	-0.148392095897525	0.882033337574518	0.94121019167227	0.568915050907356
LOC408623	7630.11917275683	0.0482076217881786	0.144205819834553	0.334297338647547	0.738155198491221	0.850376723759321	0.52490014476395
LOC100576147	57.5183659371125	0.272086105190241	0.339095987523344	0.802386684600653	0.422329313029601	NA	0.404567813427167
LOC724992	286.447584649462	-0.265783612742902	0.186240647996427	-1.42709776626207	0.153551716278864	NA	0.253901002555009
LOC410758	2596.51360775398	0.142237193753088	0.189907093874475	0.748983046663357	0.45386742371625	0.644227640985929	0.419662559890422
LOC410757	1121.34261728077	-0.135139954470426	0.157481570492575	-0.858131869321163	0.390819651373213	0.590781937107093	0.391729077426821
LOC408622	2414.91694941132	0.275029903186162	0.173937629343692	1.58119841131511	0.113832678512628	0.301195301707392	0.222908388391161
LOC725922	153.912958404728	0.458093967699019	0.250063449962845	1.83191093207378	0.066964691561675	NA	0.180396458656424
LOC411968	32.8523350562278	-0.224675684576946	0.35068900693902	-0.640669311359434	0.521737556870358	NA	0.449413063598123
LOC725982	356.003888913139	-0.0857986379957379	0.189138058056893	-0.453629686574924	0.650095382814558	NA	0.495262490833566
LOC726015	51.860866543229	0.259761459988519	0.330355448036727	0.786308993940492	0.431686484633859	NA	0.40943067772758
LOC727399	4600.12239959456	0.087011062197354	0.157482627847241	0.552512130301478	0.580597525876567	0.744962901109945	0.472005283468532
LOC102655185	235674.507651377	0.183018442189256	0.505362364477879	0.362152892763083	0.717237779673277	0.835366534158092	0.517419060557711
LOC102655581	69.8736413938101	0.0565358812548948	0.255120092408226	0.22160497325483	0.824621410655264	NA	0.554067941046138
LOC100578752	477.096511928178	-0.0326812047957671	0.152761478629099	-0.213936164333132	0.830596837989334	NA	0.555776859347656
LOC552366	1824.13680364071	0.134184904284566	0.134951822953631	0.994317092927836	0.320068516653328	0.524495922988394	0.354484315041159
LOC412017	205.916091750327	0.0868967833065183	0.198728703224838	0.437263374119665	0.661920354018545	NA	0.498989986541411
LOC412016	136.05757624832	-0.00211955896488394	0.21594090296396	-0.00981545846938355	0.992168522981904	NA	0.596192578067277
LOC113218608	400.46460233125	-0.0551333293221212	0.207282290400786	-0.265981860850337	0.790253178931179	NA	0.5431320009296
LOC409780	5455.72989350104	-0.0246582835658971	0.191419068329575	-0.128818324010656	0.897501405873289	0.950012458386597	0.572968136824764
LOC102656720	43.2322103315253	0.142890613677019	0.329813788987766	0.433246330044495	0.66483582400374	NA	0.499236672752202
LOC408618	2532.99119698292	0.190943745998726	0.166091095768184	1.1496326465642	0.250295206026556	0.453285865148527	0.314735474111418
LOC724233	3553.5665971719	0.501647280904393	0.253814171447828	1.97643527169052	0.0481055000267844	0.205326851254204	0.160182457358394
LOC408619	1338.82881861488	0.115587680503933	0.150454558071211	0.76825642230942	0.442334858750866	0.633449194161036	0.414340007013886
LOC408620	387.837326590332	0.474761247721966	0.180282436787967	2.63343038945242	0.00845271605469033	NA	0.0890715515080569
LOC102653658	151.172512923845	0.258183169222484	0.244337917314679	1.05666436081623	0.290664795703865	NA	0.338125832501588
LOC408621	1020.74138396968	0.0465380972050964	0.14654444644134	0.31756984543065	0.750811250749954	0.859710561908307	0.530477832872962
LOC102653893	58.577577917898	-0.327279047820717	0.301350127992594	-1.08604250477956	0.277460187596996	NA	0.330196163064509
LOC412319	175.285934867924	-0.256280928759021	0.228276043841088	-1.12267991177133	0.26157346258354	NA	0.321390429902862
LOC113218842	179.699683733567	0.0561055557209274	0.200428076205033	0.279928624687954	0.779532265473165	NA	0.540061524795042
LOC724535	4355.65480449151	-0.326875831982541	0.203884533230535	-1.60323996530398	0.108881685129166	0.294514122584341	0.219613823396624
LOC102653954	41.547951642944	0.52125446302253	0.307208801019906	1.69674326156025	0.0897452098334777	NA	0.203596337949875
LOC102653920	37.2778355027786	0.379859614033824	0.320070155763517	1.18680110342585	0.235306083505329	NA	0.306891995768347
LOC107964158	459.529205541328	-0.703652812700821	0.243977861664426	-2.88408467842317	0.00392553181703939	NA	0.0717463568881679
LOC551321	431.540843613003	-0.165052436199561	0.156765118005187	-1.05286455494582	0.292403073173547	NA	0.339166353916418
LOC724720	503.747703275629	0.147422973653752	0.163048056836631	0.904168847602187	0.365905876124779	NA	0.379291563277893
LOC102654159	169.896248203078	0.127663603079638	0.194423484270056	0.656626454149503	0.511421134642475	NA	0.444955898945753
LOC724795	511.494543073555	0.180308314982286	0.156709744661047	1.15058776575944	0.249901868511231	NA	0.314542396113202
Akhr	40.7484317286903	0.0134002139547944	0.317799555747262	0.0421656157551434	0.96636667282228	NA	0.589819240807696
LOC411799	247.336881254999	-0.39866823238711	0.176723312213044	-2.25588931870237	0.0240775636310732	NA	0.123367169118826
LOC414017	434.196719476641	-0.489256430668971	0.205174600871901	-2.38458575569222	0.0170983624041988	NA	0.10940662245725
LOC552530	614.775324086075	-0.025291871040759	0.190400738346377	-0.132834942030257	0.894323919477724	0.948780812360574	0.572842864056599
LOC102654398	64.8467011965086	0.149306469167275	0.25799132836631	0.578726696407724	0.562773599579374	NA	0.465236215516248
LOC413244	244.225061962784	0.0700594106812831	0.195094838207087	0.359104378799182	0.719517005990782	NA	0.518679993812911
LOC551531	237.025482376968	-0.300850314999935	0.208716188058751	-1.44143258746777	0.149462509432732	NA	0.250846055627667
LOC412107	218.774215824942	-0.0852917485859762	0.193618788932615	-0.440513800629444	0.659565019137501	NA	0.497910760752604
LOC726685	309.10582517629	-0.0854476501512194	0.176288986881971	-0.484702145395095	0.627887644436828	NA	0.487920381014628
LOC100578513	356.403222592913	-0.268550702856615	0.226669637078103	-1.18476698652004	0.236109588874576	NA	0.307494735395294
LOC409290	6855.47625181499	0.0859744510784622	0.167074102603666	0.514588734810752	0.606840438767488	0.762333611489932	0.480506488997305
LOC100577369	461.622832296858	-0.0860939009905989	0.150860592621469	-0.570685157035149	0.568213082042407	NA	0.467366324297464
LOC107966055	282.052215419777	0.0462400357853616	0.167481618354317	0.276090213599071	0.782478777079692	NA	0.541345615341408
LOC551842	350.307899873425	-0.0943576524160362	0.154307437440053	-0.611491279885281	0.540874389537195	NA	0.456520013426927
LOC100577454	312.208662200633	-0.258215052510719	0.175627893307804	-1.4702394229496	0.141496921010237	NA	0.244433826505479
LOC551892	2416.89227559694	0.326709079744843	0.14852017261534	2.19976232178913	0.0278237625119094	0.158832987260785	0.130215801381477
LOC551909	1904.66624612044	0.0476143746136933	0.133138828807793	0.357629513794449	0.720620588371165	0.837568100676242	0.518866055234837
LOC107963991	1010.38975973986	-0.176999597608678	0.150173104644621	-1.17863713364347	0.238542698541839	0.443430995952958	0.308971174385453
LOC552083	270.238216153575	-0.198005494380739	0.197668096034824	-1.00170689328568	0.316485176430547	NA	0.352908422958154
LOC409584	973.689609819281	-0.421709080444721	0.186576339140388	-2.26024951710199	0.0238057692071864	0.148004912227848	0.123367169118826
LOC724578	370.080201055489	0.0079099734325008	0.198447784110975	0.0398592177178327	0.968205364792895	NA	0.590482777730709
LOC413437	269.867733550314	0.338636689823951	0.177824833674903	1.90432732496206	0.0568675676411513	NA	0.172043612887215
LOC414038	485.670465914642	0.0113881346806627	0.180684201643522	0.0630278384998526	0.949744336468693	NA	0.585381065271348
LOC552602	1652.92820052906	-0.165521062363367	0.171958617112904	-0.962563348917196	0.335766697898316	0.53851751302076	0.36328282316088
LOC414037	241.150358717949	0.0135631568562238	0.185404622039494	0.0731543621028748	0.941683282797459	NA	0.583445414422193
LOC552628	221.78748963236	0.255959832525605	0.194798428682041	1.31397277820651	0.188855365147512	NA	0.279549267066889
LOC725317	457.626943254396	-0.281086902041537	0.177959857137567	-1.5794961097561	0.114222308122224	NA	0.223187585303155
LOC552648	137.161963112477	0.283350841700593	0.215666538063811	1.31383776196545	0.188900806847886	NA	0.279549267066889
LOC725418	97.295702617893	0.248056007659587	0.235295477048724	1.05423194177345	0.291776739363169	NA	0.338800277958347
LOC413950	425.488744875815	-0.19417131533511	0.165558832664229	-1.1728236555576	0.240866529816209	NA	0.310671256262021
LOC725574	41.6802513479622	0.0880551309638773	0.339158644870831	0.259628148347548	0.79515062145239	NA	0.544990699801633
LOC552676	962.735494017455	-0.0880443303272932	0.160269448945846	-0.549351925188453	0.58276395932362	0.745787423071433	0.472676280390249
LOC412511	2527.34099801354	0.074116514263629	0.137521439596197	0.538945159978375	0.589924695176289	0.749839878938949	0.474321968535893
LOC113218578	29.1158703191592	0.499194842545834	0.374795812492847	1.33191147261113	0.182889280643242	NA	0.275276091669315
LOC725720	124.163708432731	0.102982473867537	0.222262734356067	0.463336663997654	0.643123069368922	NA	0.493120634125337
LOC725745	608.495073531579	-0.107996865568779	0.166837169670711	-0.647318974434376	0.517425523687866	0.696423317995262	0.447253455643053
LOC113219256	404.986786879943	0.0674950729293789	0.159976765566788	0.421905472899442	0.6730940151484	NA	0.502151730811911
LOC725841	73.527067262371	-0.55208882688175	0.254193102427297	-2.17192686036654	0.0298611800947875	NA	0.1340338922744
LOC412141	1343.35720781097	0.20647512419435	0.174889100345457	1.18060601710742	0.23775927217975	0.442689005061953	0.308614878708948
LOC102656812	34.2421298356893	-0.0891845974077272	0.333008173097153	-0.267815040628772	0.7888416927639	NA	0.542859110275383
LOC551819	156.294656769667	-0.313187093375513	0.21645160434765	-1.44691509365064	0.147920705223377	NA	0.249277667072382
LOC727479	725.630498197678	-0.374908171473927	0.159877320942601	-2.34497406676289	0.0190284030623585	0.133045613682384	0.113870873739007
LOC413303	1108.06863013103	-0.569877612982995	0.203618086082172	-2.79875734001849	0.00512996734994173	0.0870090555994023	0.0776856471868986
LOC551443	193.134098806686	-0.0520854914445636	0.191585954364804	-0.271864874527212	0.785725920373408	NA	0.542147808311786
LOC551411	580.723916984174	0.61220816040972	0.220084967134409	2.78169003717476	0.00540766604114365	0.0887670014263319	0.0789682725161287
LOC550789	287.839312600626	-0.260442131251672	0.161866757982376	-1.60899084220881	0.107618344093345	NA	0.218656555593578
LOC725816	291.337596019609	-0.296560395664511	0.167258567581521	-1.77306549943978	0.0762178540215985	NA	0.190253550598317
LOC412282	971.825555964758	-0.327307129384106	0.147098725318384	-2.22508474275133	0.0260755497864974	0.153622845553557	0.126585046545791
LOC550903	493.728362397245	-0.455806350538517	0.196510742228728	-2.31949839163491	0.0203680282373997	NA	0.116668907912565
LOC408616	1234.40924432504	-0.115875912804183	0.136754230918325	-0.847329636721723	0.39681141194304	0.595354233122558	0.394024560354452
LOC102654358	60.3242736518932	0.39958997221466	0.339624286352089	1.17656477546604	0.239369264043907	NA	0.309525525927981
LOC100577822	58.3360946939159	-0.0716290203968215	0.30724546223531	-0.233132882991004	0.815658221372506	NA	0.550878410980865
LOC102654894	49.0125383624741	0.196911822945993	0.295095141020666	0.667282498332302	0.504591703479821	NA	0.441409167604773
LOC410754	150.334599078556	-0.130351475773734	0.220608545134303	-0.590872287809062	0.554605995265384	NA	0.46215793069874
LOC551383	310.261518498167	-0.210790268756698	0.198285213583776	-1.06306599946061	0.287752022105999	NA	0.336276590033419
LOC552743	28.6018525714152	0.53626257105771	0.432865882906352	1.23886541359446	0.215395344050612	NA	0.293125806077627
LOC107965891	48.8448483324398	0.266685884700106	0.300524487136918	0.88740151340348	0.37486276899354	NA	0.384212072064874
LOC409517	2307.54127144708	-0.128414455083359	0.14767090176907	-0.86959890909433	0.384519634161832	0.584997985820139	0.388774100113346
LOC412528	1228.03855227779	-0.135904493279089	0.152507383509304	-0.891133859566863	0.372857361956879	0.57572783272289	0.383309676762235
LOC408615	597.176275926141	-0.0344082593284865	0.153734548196874	-0.223816050016441	0.822900440652284	0.90755237828606	0.553438520083615
LOC551202	210.82204309244	0.192292501939265	0.197268723984784	0.974774399382729	0.329672178622802	NA	0.360316824345367
LOC410753	159.441752513903	0.100724437401256	0.200554089650276	0.5022307826128	0.615505192016407	NA	0.482798631996758
LOC408614	2018.61448537603	-0.206626188861804	0.184449222051187	-1.120233452676	0.262614291966031	0.467324285129715	0.322306074834147
LOC100578445	274.780551595632	-0.0334669297557597	0.199366007696463	-0.167866780011533	0.86668808493453	NA	0.565177984631623
LOC410752	25.7017708745337	-0.707967548815917	1.22461379495481	-0.578114954880156	0.563186511029682	NA	0.465236215516248
LOC410751	69.1862942790063	0.1560181811653	0.293625160806951	0.531351539277239	0.59517519653075	NA	0.476810029861092
Syt1	6283.09887575613	-0.263989611650849	0.177500508913161	-1.48726115360041	0.136945850113221	0.329027108753665	0.240600091740847
LOC107964984	40.8246269155979	-0.246421530899232	0.323116457715758	-0.762639986342032	0.445678130588397	NA	0.415970761689462
LOC412523	67.6142285915222	-0.15109266525312	0.298271721224607	-0.506560476577472	0.612463245989584	NA	0.482645389518432
LOC726298	135.719413807556	-0.0278886835258298	0.235495059744505	-0.118425768914588	0.905730308802634	NA	0.575162888947655
LOC102654581	83.0399112044217	-0.142602625679231	0.271716400675779	-0.524821561468381	0.599707241241764	NA	0.478241146507479
LOC413735	462.728541127098	0.0248730064517117	0.150277312451624	0.165514048966763	0.868539392860086	NA	0.565443838539119
LOC726221	629.411950437128	0.439441167215038	0.237200981051002	1.85261108646322	0.063938122265364	0.233257565646874	0.178387330403271
LOC410043	5427.95059956855	0.196653896320145	0.144145657190015	1.36427208529017	0.172481948087303	0.371670778459091	0.267586982343671
LOC409468	3382.01622720302	0.429752258539664	0.178437365939524	2.40842077149534	0.016021703407736	0.123952463972213	0.107040275195615
LOC102653866	75.523025890225	0.313364412219006	0.255226060433805	1.22779159654145	0.219525211067112	NA	0.295561757206294
LOC726449	68.8990409059646	0.00821598293878682	0.250131779417806	0.0328466177225059	0.973796902684228	NA	0.591444820448582
LOC552636	419.79229300817	0.0899160039600359	0.165591060989994	0.54300034930913	0.587129561928152	NA	0.473863525259599
LOC726088	3339.98206643645	0.222206165120603	0.152065391640066	1.46125402186553	0.143945742641618	0.338210181033498	0.246541976814997
LOC412397	935.974212039306	-0.224992835104988	0.165555895976407	-1.35901433034466	0.174142047748776	0.37284258941084	0.268713012328384
Dat	881.359408940001	0.061157640550075	0.232661057969711	0.262861525189303	0.792657312157796	0.889332829299522	0.544106952694526
LOC409417	8796.12129509556	-0.116183215483504	0.160478281253299	-0.723980931102569	0.469077442063042	0.656647289801024	0.426279427813997
Hsc70-4	133740.753438929	-0.0138991391894957	0.188129753320896	-0.0738806007244786	0.941105392036357	0.97084333861294	0.583352556918328
LOC727596	238.063464242282	-0.0256264797970144	0.18104422897308	-0.141548172744158	0.887436906754338	NA	0.570115891351028
Fabp	5559.3633577624	0.350650841600934	0.170789312891199	2.05311934139765	0.0400610045636786	0.1885526619253	0.14864691592653
LOC724192	8376.65432255562	-0.531887759221979	0.208348523080672	-2.55287511213139	0.0106837796813217	0.108524262968754	0.0934348539706978
LOC102656214	48.675066481635	0.053288389489752	0.389114664911391	0.136947779909264	0.891072071681427	NA	0.571413575851831
LOC410034	402.79287603425	-0.0225876604919545	0.159096994008692	-0.141974150000096	0.887100424140019	NA	0.570034071842469
LOC724280	412.610438526669	0.122448199934741	0.161315208464228	0.759061722081173	0.447815635567051	NA	0.417108861680081
LOC410033	182.917719528844	-0.12825986075299	0.199024746911247	-0.644441772912722	0.51928900394551	NA	0.4482246047772
LOC724327	155.437645702617	0.0784539222350841	0.192197822024645	0.408193607027577	0.68313154127951	NA	0.505953855546037
Trxr-1	2549.87234653591	0.27156159984293	0.155370624743971	1.74783103492327	0.0804932896125054	0.25567071214155	0.194169014020677
LOC413693	93.6766222378274	0.42614211302449	0.276269866467653	1.5424849567312	0.122955790752457	NA	0.230431568270586
LOC100576321	863.875552557833	-0.492966898605613	0.214201008504984	-2.30142193095296	0.0213677934738035	0.142081101475122	0.119958764697836
LOC411794	1559.57065889341	-0.0155231723739809	0.142583858375392	-0.108870474897038	0.913305225033166	0.960419299368856	0.57714485982951
LOC412190	518.064029918908	-0.120304811724355	0.194649805403407	-0.618057703551394	0.536537302066255	0.712211851290639	0.454760330303808
LOC102655540	391.308454578409	-0.0710523374360243	0.176412065655738	-0.40276347976493	0.687122229757146	NA	0.507621815943645
LOC412189	973.043336302167	0.0354834373086305	0.135652987773891	0.261575051835755	0.793649080235059	0.88998561631731	0.544513491030079
LOC409383	1002.24192886871	0.530369210398911	0.161927895019414	3.27534184480891	0.0010553418679846	0.0526700504688405	0.044256646594819
LOC102655431	22.9318757756304	0.362135853894536	0.438514796448032	0.825823568161975	0.408904182642604	NA	0.397466834384787
LOC551556	65.3358053768862	-0.311336220096621	0.27347580907705	-1.13844153582485	0.254936158432315	NA	0.317297701135683
LOC409053	6470.62042960965	-0.358069157927748	0.216511117014762	-1.65381419145943	0.0981652716018114	0.28004836353158	0.210280389952524
LOC411408	374.748998206939	0.390005000462902	0.223026734036645	1.7486917079583	0.0803443241503536	NA	0.194003972933333
LOC107964618	54.0456378867993	-0.385581315508679	0.319346075625505	-1.20740896769575	0.227274683652759	NA	0.30065741552144
LOC411407	324.015286093995	-0.252963146308986	0.176638712433587	-1.43209346820899	0.152117073547607	NA	0.252601407973906
LOC411406	118.718038264905	0.135735112734441	0.292300165530108	0.46436892188643	0.642383452200177	NA	0.492814425830304
LOC100576547	411.643659071406	0.443846476690873	0.168123607176056	2.64000091448243	0.00829058035106729	NA	0.0889289274292993
LOC107964593	32.7467528143585	0.162210801170015	0.344926222179042	0.470276803384974	0.63815726807284	NA	0.492220692274892
LOC411405	65.4740684647665	-0.488094485000492	0.287907208451958	-1.69531873698097	0.0900149722517314	NA	0.20369538041872
LOC413346	586.782777920051	-0.188817650441315	0.154925272318227	-1.21876597417541	0.222933029398383	0.425483610394627	0.297805273392391
LOC551761	3660.86200985328	0.227951676569165	0.281150090015515	0.810782868881833	0.41749037408507	0.60912070036202	0.40176790483145
Or2	143.457998798032	-0.253867453910254	0.268096755859559	-0.946924751462642	0.343677124398407	NA	0.367230951226686
LOC725345	108.691807731415	-0.0419880659162217	0.21497819200517	-0.19531314094972	0.845147810187475	NA	0.559900979501621
Pcl	35.9396029952105	0.038119850231899	0.332997811696501	0.114474776989351	0.908861439988228	NA	0.575422172048751
Rnft2	435.875486785524	0.0915117058125185	0.155486487017825	0.588550861027734	0.556162605637752	NA	0.462478479035943
LOC725419	748.680882257126	-0.329731809652535	0.181587020343389	-1.81583358231771	0.0693959041299434	0.239902082589343	0.182852977073182
LOC725455	87.3285842674587	0.379449190446159	0.231847354206628	1.63663368833609	0.101707032148927	NA	0.213587081436315
LOC550785	44600.8064128313	0.0836824054946584	0.11684931465962	0.716156579423884	0.47389467071096	0.660131697813567	0.428514210592927
LOC102653822	100.499866756076	-0.457534308960833	0.277107777930439	-1.65110597897287	0.0987169366728758	NA	0.210851870657089
LOC100576291	481.053659954764	-0.48678284630039	0.173380187840822	-2.80760363893075	0.00499116166170605	NA	0.0773804966001896
LOC411600	1028.5439775329	-0.14814034882404	0.165392969357382	-0.895687098427608	0.370419902847084	0.573800648648604	0.382314672067555
LOC725606	32.5559060027412	0.00670652409721359	0.352066618129582	0.0190490201338691	0.984802000079787	NA	0.594431700712125
LOC113218708	78.2847522838893	0.120197364524891	0.271304306266607	0.443035225569825	0.657740255859038	NA	0.497609717708871
LOC410749	402.678351959294	-0.429063085188602	0.193532873871797	-2.21700363666809	0.0266228430209794	NA	0.127426394549477
LOC725682	53.3418833965722	0.640261724637573	0.299742433569626	2.13603965582287	0.0326761816413899	NA	0.137444067463927
LOC725746	119.896617705109	-0.326394999561846	0.218187564561026	-1.49593768195967	0.134669895515149	NA	0.239662417166712
LOC552038	167.610304732477	-0.289380768771262	0.18969242189304	-1.52552624866813	0.127127891643581	NA	0.234119141535726
LOC412287	1746.50515454874	-0.756582220850043	0.192867804673022	-3.92280205673887	8.7525057925633e-05	0.0122591548875193	0.0116379701250654
LOC552316	413.736715700761	-0.0178881633904998	0.164722073712127	-0.108596030801322	0.913522909097563	NA	0.577159364791606
LOC552294	1201.91201842264	-0.333672616610908	0.169738296060378	-1.96580632865678	0.0493209864922696	0.206283411355537	0.161584951805462
LOC411372	231.433783874404	-0.209726610305828	0.171604297429364	-1.22215243701665	0.221649986511635	NA	0.296602885958409
LOC725920	81.0559705735382	-0.0743415379134901	0.231797268824421	-0.320717919976018	0.748424165936673	NA	0.529340086390173
LOC552206	2162.06932308827	-0.220027126319207	0.195751879527384	-1.12401028715756	0.261008661848778	0.465038822218873	0.321130723636996
LOC552187	365.193302718764	0.318835299281876	0.191074381872684	1.66864493375319	0.095187768236504	NA	0.207323715232825
LOC409807	58.4084972679197	0.311295501571647	0.289655207793842	1.07471052891688	0.282504348335647	NA	0.333030514015116
LOC107964341	95.5402469893624	-0.492181508846578	0.281465716783756	-1.74863750537942	0.0803536989310791	NA	0.194003972933333
LOC726119	292.630071119198	0.101610898917434	0.187613784205	0.541596127107625	0.58809676041518	NA	0.473863525259599
LOC503505	65098.5119407358	0.365606139125488	0.132505224055521	2.75918283019766	0.00579461057821842	0.0901799251993705	0.0797733365283433
LOC107964344	41.5751518062621	0.283578691988451	0.329470858283529	0.860709482671196	0.389398069085322	NA	0.391127922791725
LOC113219391	76.8159588728107	0.643236047336594	0.285134933544506	2.25590052870948	0.0240768614159192	NA	0.123367169118826
LOC552117	586.249980168387	-0.0451479133574341	0.170081593069625	-0.26544855644051	0.790663934673458	0.887555016637061	0.543285884027593
LOC412103	1514.25804958172	-0.473347040803088	0.162708331974485	-2.90917517903949	0.00362383740957015	0.0790688544339376	0.0692299980055432
LOC100576139	85.8032948683274	0.0779391404255598	0.240916532146111	0.32351096760056	0.7463083027892	NA	0.528323389351402
LOC414021	922.711479820267	-0.377100194794196	0.259060640747197	-1.45564449198668	0.145490921891601	0.339167071135014	0.247154265180972
LOC100579059	545.990372206999	-0.236996243011847	0.208370321652467	-1.13738003153407	0.255379451236269	0.458395029875106	0.317500957672086
LOC414022	2644.76999084061	0.010458813236341	0.135527049497092	0.0771714080336817	0.938487186881945	0.969943481195054	0.583182714323109
LOC725040	111.011950180781	0.126375437878719	0.219250665434279	0.576397055071195	0.564346834501394	NA	0.465450307716119
LOC410070	743.310553646507	-0.489061467029956	0.20284558474329	-2.41100375760648	0.0159086845371987	0.123952463972213	0.107040275195615
LOC410071	1627.49252208851	-0.00828269399770671	0.139773544454981	-0.0592579520681357	0.952746651617664	0.976421668897937	0.586382889425261
Grd	652.433673049653	-0.367617709426711	0.217556572356169	-1.68975685471304	0.091074481199534	0.269735545197179	0.203988093952791
LOC412458	5004.89206096815	-0.656021055870903	0.197809183416359	-3.31643376986233	0.000911741948744088	0.0480463508758449	0.0413801441643699
LOC724721	7119.36734191035	-0.112560258732638	0.183099382264411	-0.614749527500269	0.538720146148827	0.71358232903545	0.455689459462554
LOC412829	179.898946925778	0.166733169961064	0.331061453504382	0.503632084605878	0.614519941784694	NA	0.482798631996758
LOC724634	6603.78716733654	-0.191302563511371	0.220798977942535	-0.866410548155527	0.386265061486588	0.586625707231467	0.389599523127093
LOC409360	4476.12413691557	0.109147704465411	0.141854405804676	0.769434716153263	0.441635286103299	0.632864822528226	0.414040414317746
LOC724585	379.845836377449	0.0243589554991746	0.155544009351013	0.156604909445303	0.87555623311363	NA	0.56697353803631
LOC724536	311.043081980422	-0.132070940408618	0.175398980660828	-0.752974389651702	0.45146530390263	NA	0.418577366473771
LOC409520	167.370237557762	-0.114240116844574	0.19783265595292	-0.577458338686818	0.563629874362363	NA	0.465351796420572
LOC412546	212.194322020074	-0.229616612364434	0.202288702180879	-1.13509360576707	0.256336100408943	NA	0.318167733003747
LOC724455	509.781179954882	-0.175957297607769	0.184705381985752	-0.952637631432647	0.340773703598701	NA	0.36635418045028
LOC412212	1053.30403089865	-0.0158261576695113	0.148305236992124	-0.106713410736478	0.915016343133196	0.960590174536832	0.57739726137276
LOC107965181	48.8291389052396	-0.0980177717348951	0.314209365767935	-0.311950509480637	0.755078135421775	NA	0.531894606614002
LOC409527	571.845870688948	-0.272580678593364	0.165016010197595	-1.65184383180134	0.0985663907172952	0.280823666991139	0.210808300152901
LOC413868	3249.62842913989	-0.153323544454625	0.200851006790555	-0.763369558881568	0.44524302910592	0.635927620018056	0.415849442194387
LOC551974	581.902828504594	0.224693997671964	0.184808366959555	1.21582156353958	0.224052902565184	0.426496143331007	0.298499520154286
LOC552001	159.313321693259	0.0762215630210316	0.229075944005548	0.332734907420858	0.739334397193016	NA	0.525433328869682
LOC413867	2329.77724951324	-0.13418816635893	0.130621981861086	-1.02730156476754	0.304278485801384	0.509234678252534	0.345591057270039
LOC552052	358.562546622733	-0.356639724702107	0.199473591372881	-1.78790446518523	0.0737914223919241	NA	0.188329840424314
LOC727074	314.158495041765	0.291448819827833	0.217782963899019	1.33825352823728	0.180813805184177	NA	0.273663303562859
LOC727079	163.191573947594	-0.234940581259683	0.188507568313186	-1.24631909138711	0.21264727163047	NA	0.291789686694363
LOC100578907	466.53668410307	-0.16137707149579	0.146369891077725	-1.10252914931867	0.270231693138037	NA	0.327355851859961
LOC727087	215.324422753354	-0.0299571971836917	0.201929874031523	-0.148354458830669	0.882063038871611	NA	0.568915050907356
LOC412480	365.285663742713	-0.333235128071	0.191808388098509	-1.73733344706414	0.0823283310597957	NA	0.195737458360506
LOC727539	445.049937227379	-0.275743175551181	0.22601672711077	-1.2200122489874	0.222460231506856	NA	0.297355590963227
LOC727538	110.711742243593	-0.256241911171467	0.214784975041213	-1.19301599714924	0.232863108008101	NA	0.304828335545
LOC724115	316.926402819038	-0.335430096236475	0.206994903932883	-1.62047514148096	0.105130250020733	NA	0.217260909832514
LOC724144	632.655678464625	0.424731859008296	0.18522528167213	2.29305554389773	0.0218448073733387	0.142870077947035	0.120191726955612
LOC551154	3637.0600341101	-0.356465772548864	0.161485800236903	-2.20741249091822	0.0272852545100192	0.15687584862685	0.128635558036229
LOC724234	409.081047126782	0.248498451743607	0.18040740006613	1.37742937181356	0.168379537116013	NA	0.264714586447413
LOC409957	3674.10206300937	-0.504714090420339	0.204422127821107	-2.46897973228232	0.0135498892693171	0.115813124666924	0.100229819015139
LOC724328	638.859807414602	0.128682399292347	0.139118374119949	0.924984928169128	0.354973747382021	0.557230241593099	0.373365703686178
LOC100577254	1439.98681579429	-0.188959819009563	0.14949314998514	-1.26400319364697	0.206228880671301	0.407604527662161	0.288003732477852
LOC100577291	127.132051320691	0.454427578984339	0.220173929087116	2.06394817437507	0.0390226304406852	NA	0.148043198911764
LOC725775	1108.06402278021	0.134486782126275	0.15519947287397	0.866541487776091	0.386193285167241	0.586625707231467	0.389599208453032
LOC100576726	50.7931398209166	0.267962476736503	0.27769113027393	0.964965919048875	0.334561882272103	NA	0.362991356473431
Stip	338.142690707791	-0.245227385253068	0.170916050103311	-1.43478266145771	0.151349040208584	NA	0.251955424585973
LOC726243	534.700194138733	-0.264576472660852	0.181358114917061	-1.45886205743729	0.144603078061932	0.338525583107765	0.246789168610701
LOC410743	45.0879077876255	0.187469496756421	0.294656024374094	0.636231677783078	0.524625428875056	NA	0.450510006896659
LOC410746	122.672040311419	0.566025857626248	0.234419999250898	2.41458006754976	0.0157533601709376	NA	0.106617929616471
LOC552425	1362.40406113788	0.679879403251893	0.19227815792067	3.53591593868087	0.00040636397744884	0.03095495421198	0.0280425045547984
LOC410747	439.315924998746	0.665970354617485	0.212401326012866	3.13543407246499	0.00171599993875282	NA	0.0542085384496852
LOC410748	126.465859866049	-0.03533283632379	0.236686408499685	-0.149281222135901	0.881331731804248	NA	0.56872861259657
LOC107964221	192.905982847357	0.0543726684372763	0.203895550726333	0.266669224726021	0.789723851187848	NA	0.542913643029288
LOC550645	605.396261065463	-0.324112536892823	0.266959862953821	-1.21408714144002	0.224714449690293	0.42738070107545	0.299088517053318
LOC102656636	63.2623284716286	-0.263826256266403	0.287515655614897	-0.91760657589991	0.358824873936	NA	0.37583733332174
LOC107964213	736.78468107834	-0.0378692032648066	0.147359630155923	-0.256984923379195	0.797190411720852	0.892113599920602	0.545706972828787
LOC408609	368.587566999099	-0.182960314156797	0.157792456431015	-1.15949975236481	0.246252537410983	NA	0.312570219602901
LOC102656814	154.622583345979	0.484944259741895	0.264247008241673	1.83519299979502	0.0664770979933037	NA	0.18012448988148
LOC410741	8040.29695500689	0.034105653879446	0.138310056891807	0.246588387322588	0.805226792648668	0.897406245811221	0.548111117556915
LOC102656788	73.702487503172	0.392942507949765	0.26457016342782	1.48521096581235	0.137487948070643	NA	0.240958628250031
LOC100578082	54.9292072205855	-0.0109974939210628	0.294682296698298	-0.0373198323899391	0.970229992546336	NA	0.59072628215016
LOC551384	713.916513016467	-0.0355610214807616	0.149737929724509	-0.237488400876034	0.812277916608966	0.900627027652043	0.549753229589518
LOC413813	600.453508844405	-0.201166333505603	0.16282816999548	-1.23545166362299	0.216662455252813	0.417979203085129	0.293788616638789
LOC551416	404.131490718464	-0.0808020830266923	0.175973594827164	-0.459171633710464	0.646110918967438	NA	0.493952663857605
LOC113219245	34.3314182745128	-0.119605640830941	0.356483057137984	-0.335515639343964	0.737236149243544	NA	0.52490014476395
LOC100577194	51.3972159890018	-0.127388545709586	0.274023889819006	-0.464881167089946	0.642016557881598	NA	0.492814425830304
LOC100576961	114.817192523309	0.0583039341229121	0.224715392242685	0.259456789056736	0.795282818020572	NA	0.544990699801633
LOC726412	52.3745543681157	-0.0572250221398112	0.278187109897644	-0.205706950839191	0.837019828695311	NA	0.557433023889814
LOC409749	163.991208331564	0.161851968601932	0.200756161114936	0.80621171326976	0.420120785993463	NA	0.403444652067184
LOC413056	2815.36447303782	-0.120748517830701	0.14568116940422	-0.82885467164024	0.407186647417576	0.600727172375041	0.396801982334693
LOC726451	45.6419090491238	0.594874608405043	0.297716314938899	1.99812566041982	0.0457030384196113	NA	0.156604263687894
LOC413055	333.109973121783	-0.429791880021576	0.204921588539708	-2.09734798116839	0.0359627823340798	NA	0.142690559082785
LOC409748	3909.74687702742	-0.0546240706325841	0.139554880154714	-0.391416413184739	0.695489462177154	0.819933544603096	0.509893952190654
LOC410740	278.346980350351	-0.00643011982194804	0.178057408675397	-0.0361126215965005	0.971192558314465	NA	0.590931896787511
LOC410739	1674.00205852631	-0.112488093533304	0.197439671086889	-0.569733999829244	0.568858126018864	0.736428736784111	0.467496795336396
LOC113219185	34.9833072130814	-0.148566073564121	0.36916643836975	-0.402436565523652	0.687362764161298	NA	0.507621815943645
LOC408608	33326.6417991463	2.25685231104435	2.20990713144094	1.02124305539157	0.307139298177704	0.511293966280417	0.34695788188559
LOC410736	2810.97558644638	0.0472278244129783	0.184122902655487	0.256501628704749	0.797563522974757	0.892301163812521	0.54589383640385
LOC726646	167.220950678327	-0.232523181468402	0.224486894462349	-1.03579846843755	0.300296172249705	NA	0.344164697720999
LOC413425	392.390706085729	-0.634678941261541	0.257826711129174	-2.46164929336418	0.0138299825983221	NA	0.101339180039282
LOC102656327	46.2676310781693	-0.0898151693680276	0.310310446644649	-0.289436499283826	0.772247367274074	NA	0.537672336132082
LOC100577481	127.94872875859	-0.188830049417303	0.22782353296651	-0.82884347792579	0.407192982264589	NA	0.396801982334693
LOC100576770	162.880179162336	-0.220305945208195	0.211573791639902	-1.04127237830646	0.297749152429359	NA	0.342452925068425
LOC413754	452.562699912722	-0.412212288791804	0.260029953550113	-1.58524924980368	0.112909714723972	NA	0.222293836260329
LOC726729	512.97598758258	0.0321611459356187	0.195168876043598	0.164786243521914	0.869112232093206	NA	0.565443838539119
LOC408604	296.70225079921	-0.10554716888607	0.169845698073153	-0.621429745253899	0.534316905927307	NA	0.453512938157186
LOC726742	108.682808922306	-0.202785798994736	0.221557958199245	-0.915272015697009	0.360048846346008	NA	0.376388026017032
LOC100577003	121.749541975222	-0.445830866174204	0.227507664368175	-1.95963009603367	0.0500390410464217	NA	0.162475158747791
LOC102653957	39.967527446351	-0.272048487582302	0.322144819033344	-0.844491270723009	0.398394939260313	NA	0.394391389246243
LOC100577082	2696.47559655961	-0.171304531438362	0.150078441098113	-1.14143330770854	0.253689650595038	0.456305079902094	0.316331326587125
LOC100577113	439.940027920901	-0.393335992060429	0.198126326546652	-1.98527878104988	0.0471134634695367	NA	0.158687086569067
LOC551241	5263.16953249543	0.135456156743825	0.155360065637009	0.87188529554507	0.383270956285699	0.583916663927195	0.388087403743155
LOC409966	708.94975564342	0.136416068049613	0.179664214695923	0.759283468221503	0.447683004631886	0.638001385791614	0.417088895643183
LOC551318	594.190459333286	0.376806572123917	0.198690650251976	1.8964484320025	0.0579007727886256	0.223557243281896	0.172399321792531
LOC408602	2150.02046542509	0.253511213677391	0.155448021077119	1.63084233508269	0.10292359192678	0.286549242057506	0.215206380913675
LOC410734	826.6054002247	0.0219166666646022	0.272778879725225	0.0803459075962158	0.935962147223805	0.969855033968441	0.582902016585994
LOC408603	1942.99818928786	0.11170209989272	0.281221100369562	0.397203836219716	0.691217153511006	0.818423858040787	0.508925550106465
LOC410733	82010.7369877535	-0.0253343962049764	0.193024814139279	-0.131249426753475	0.895577997207136	0.94913343028396	0.572842864056599
LOC408601	505.942436148294	0.241531247387854	0.162519902787971	1.48616411432982	0.137235716980104	NA	0.240876477785978
LOC410732	3540.63665443403	0.597637973842126	0.245247543028946	2.43687649817388	0.0148147381695538	0.120245072025161	0.103953452766493
LOC113219088	31.6627555259927	1.21351458787426	0.468383945455276	2.59085436136096	0.00957379983365133	NA	0.0917123945390962
LOC102653666	74.1986398390741	0.385445904706136	0.251875760497974	1.5303017009024	0.125942067471803	NA	0.233039202197937
LOC412410	608.655325679218	-0.324325713681764	0.18067865775005	-1.79504163757092	0.0726470662432742	0.244901833562342	0.186764540945589
LOC727267	105.345686788048	-0.193429885092284	0.22451779072949	-0.861534778441404	0.388943575041068	NA	0.390926947859869
LOC727263	1758.85969913697	-0.255417994578211	0.192448691069256	-1.32720047696398	0.184442374670632	0.385765313497053	0.276849378621604
LOC113219001	38.7405934417246	-0.0603421700459277	0.334222217115769	-0.180545059411853	0.856724683251127	NA	0.562889522922521
LOC725383	7911.81559207464	0.186019289528315	0.156949265111748	1.18521924518646	0.235930772650828	0.440607060150492	0.307339100251426
LOC551546	381.029622712766	0.066346866264786	0.158086718835041	0.419686528721095	0.674714467482405	NA	0.502845282353304
LOC410157	155.086420241299	-0.0326529389281333	0.19628557919874	-0.166354242942484	0.867878180977512	NA	0.565443838539119
LOC412588	903.608548779437	-0.302370981299625	0.184067689259552	-1.64271623398963	0.100441658361641	0.283746051142645	0.212880254875429
LOC411572	635.372699888764	-0.420755036183994	0.176820133478286	-2.37956519943281	0.0173330764111473	0.128649944918293	0.110132894028394
LOC409113	355.557814263548	0.0165582500365297	0.159189739584328	0.104015812072852	0.917156800417102	NA	0.578117122604735
LOC409114	25749.2784487414	0.341643340515413	0.186117047777212	1.83563700690316	0.0664113601263387	0.235247154811256	0.18012448988148
LOC411573	424.721799136637	0.252137098218248	0.171934675758233	1.46647031557958	0.14252020240993	NA	0.245566230366898
LOC409340	1223.01711174623	-0.0577010735800278	0.152824900856694	-0.377563297974162	0.705755033856784	0.826649138658257	0.513415509121428
LOC102654365	367.734978391173	-0.376597309103502	0.171666737164764	-2.19376983172953	0.0282519606727929	NA	0.13099100268846
LOC726541	1436.21014944918	-0.374338489519016	0.181734123952546	-2.05981398197271	0.0394163273915649	0.187739854336758	0.148326211531416
LOC412114	426.135026906406	-0.349239107591011	0.187193709541529	-1.86565621487154	0.0620894792570574	NA	0.176742213333333
LOC726505	1051.4600222835	-0.0792561260697378	0.234482638155773	-0.33800424071093	0.7353599920431	0.849205479430732	0.524417594628787
LOC409078	353.5389417586	0.271480040106174	0.162811083862717	1.66745428913849	0.0954241065078656	NA	0.207589662771888
LOC551581	794.472912363507	0.510004833380709	0.157885140302143	3.2302269384232	0.00123691995013031	0.0559448585777689	0.0479032288723651
LOC413357	1047.19911309421	-0.153932349376028	0.177847354045067	-0.865530725506445	0.386747559314672	0.58715311277773	0.389797714209365
LOC107963982	390.22799735258	-0.31427347318334	0.2531060130273	-1.24166735283939	0.214359320125107	NA	0.29266564736434
LOC100576288	311.773819667216	0.084726169988636	0.285492549004184	0.296771913257163	0.766640649910029	NA	0.535630074607298
LOC409927	1339.27323417391	0.06260223229067	0.150640247004731	0.415574413448114	0.677721452800933	0.809303316881839	0.503983944778782
LOC409926	310.043022353999	0.349702303365862	0.221736336372765	1.57710869173003	0.114770517617476	NA	0.223330496591277
LOC551728	313.934972703231	-0.505615635408	0.211210644204626	-2.39389277615264	0.0166706214399538	NA	0.108971875815322
LOC409925	342.128543359381	-0.142483284649998	0.200875419072652	-0.709311698304234	0.478131070497614	NA	0.43010874696956
LOC413470	2974.14294721632	0.0912356392848045	0.206375395208498	0.44208583679576	0.658427092918431	0.79641330304199	0.497662105244805
LOC409924	4313.63253534836	0.250152885727564	0.144976003139977	1.72547787433508	0.0844413878093346	0.263016144812146	0.198767554834293
LOC413468	1366.12991910284	-0.304808950516571	0.168081958414908	-1.81345430164583	0.0697617808156703	0.240470132558332	0.183232157439436
LOC413467	315.170465892141	0.171673991037865	0.179263297042064	0.957663915986004	0.338232257857436	NA	0.36469338983068
LOC409606	842.454071174474	-0.123955002304487	0.150024823670713	-0.826229948295451	0.408673662659466	0.601716189646457	0.397351431449303
LOC409607	1885.29534070747	-0.170044248584589	0.153756873952962	-1.10592940798607	0.268757074935613	0.47475314050872	0.326464336642328
LOC409608	128.396194982112	-0.099782668978457	0.212979323801989	-0.468508713414954	0.639420841317625	NA	0.492776989472496
LOC113218547	48.4930097506147	-0.153219132502388	0.304918290444418	-0.502492429296621	0.615321176494492	NA	0.482798631996758
LOC100578747	37.2959520517664	-0.229854336226252	0.392237709846492	-0.586007745956422	0.557870309531982	NA	0.463280367359543
LOC409701	202.63948780098	0.377888000227584	0.222975664359098	1.69474996885312	0.0901228621003804	NA	0.20369538041872
LOC412813	371.783323735449	0.35177477013445	0.171095774502649	2.05601085799465	0.0397814696184029	NA	0.14854452692839
Crzr	996.57603323865	-0.244425252878283	0.22082883301939	-1.1068538901205	0.268357104297037	0.474625884667102	0.326338842532339
LOC408600	2003.9129321836	-0.515538937922843	0.197786431007759	-2.60654350905709	0.00914612032770451	0.106491538304407	0.0917123945390962
LOC725189	5149.6348693233	-0.094504616500299	0.183630271606633	-0.514646172842046	0.606800293693792	0.762333611489932	0.480506488997305
LOC408598	3266.50950117945	0.476985884975733	0.192362669147699	2.47961772982832	0.0131523303137826	0.11462688797488	0.0991194204871275
LOC102656618	1754.2101557014	0.216309612704546	0.191631197324668	1.12878078164938	0.258990321793405	0.462772007089286	0.319729831201075
LOC410730	4925.0128500567	-0.113277229967327	0.175875696254942	-0.644075516853252	0.519526465740695	0.698404580380177	0.448300113147597
LOC408597	273.10398552799	-0.0352689526497467	0.17777920303182	-0.198386268181402	0.842742860336434	NA	0.559019919228422
LOC408596	476.07889485572	0.4251991277621	0.225283996010069	1.88739162698045	0.05910767047926	NA	0.173712120065207
LOC100578424	92.4801708867304	0.0448697367986549	0.244493336781905	0.183521307325769	0.854389001851578	NA	0.562543471351165
LOC725576	2276.92695232449	0.163628262890895	0.127920660581445	1.27913866413092	0.200848230321413	0.402623737791124	0.285219086941909
LOC552761	26.7429307798612	0.0960284386826462	0.434730457807577	0.220891904300735	0.825176601165718	NA	0.554067941046138
LOC551385	1065.67378533883	-0.231937009014652	0.17033286148121	-1.36166918701262	0.173302309702569	0.372514172637898	0.268146880057663
LOC102654014	309.300037190418	-0.0530354536823938	0.171517580423164	-0.309212930543597	0.757159558418797	NA	0.53254889541525
LOC725747	246.428305791684	-0.0983450229179198	0.185552761832861	-0.530011097363807	0.596104236616732	NA	0.476976997931661
LOC725776	1428.10920362915	0.482658156574348	0.178396616843043	2.70553424787758	0.00681946160188288	0.0977573187455778	0.0862886170265971
LOC551557	684.819317894257	0.0391164282680609	0.165255533711656	0.236702683350457	0.812887453101878	0.900627027652043	0.549853388333221
LOC100578653	206.695717112909	-0.320676193051457	0.175474675006232	-1.82747848394686	0.0676278583615002	NA	0.180904821800861
LOC413713	220.937445290482	-0.118703245325338	0.182932649379647	-0.648890428952293	0.51640920154311	NA	0.446691682129836
LOC410115	840.669349523315	0.0719035499764053	0.163230321560022	0.440503634920337	0.659572380204437	0.796816703296753	0.497910760752604
LOC410116	803.059927702178	-0.278102834497232	0.157805204870796	-1.76231724881908	0.0780157111761366	0.251841937111335	0.191842606564779
LOC102654555	498.465943528134	-0.189204985583967	0.165067414622972	-1.14622856374244	0.251700592035872	NA	0.315325574497983
LOC102654510	453.96278368367	-0.133221268772546	0.205185916080344	-0.649271018778801	0.516163214718702	NA	0.446691682129836
LOC100578735	35.3536025304454	0.152080505509926	0.51698945691201	0.294165583991414	0.768631377745107	NA	0.536532165845547
LOC413907	647.17689331348	0.212886183643454	0.525554141496644	0.405069938250716	0.685426102898987	0.814928844136747	0.507153830713104
LOC409755	760.681822245132	0.00156883367603943	0.140791588047902	0.0111429503551424	0.99110939593437	0.995005086045557	0.596115458853336
LOC551939	410.727235234839	-0.0445354658366296	0.164167093549922	-0.271281319986863	0.786174672455267	NA	0.542388797370886
LOC413080	315.323644735633	-0.00169685893006306	0.160298956230019	-0.0105855893885434	0.991554079394364	NA	0.596182301642367
LOC409756	1854.63595748058	0.0185655132917488	0.128623349283498	0.144340148154816	0.885231876586241	0.943002160975824	0.569639091278158
LOC413081	451.755578026125	-0.246851306341215	0.190093174769412	-1.29858058628697	0.194087903983964	NA	0.281819858111032
LOC724329	217.169720466045	-0.165755482700419	0.189628631818819	-0.874105777754021	0.382060651304391	NA	0.387777434673402
LOC409757	700.416955375889	-0.353936806368671	0.183501291772696	-1.92879735586328	0.0537560242302613	0.215719646217925	0.167299096194022
LOC551818	392.361947156981	-0.0338528108012844	0.153721830836	-0.220221230889454	0.82569886261796	NA	0.55410270833391
LOC551790	106.445256556124	-0.250338006951163	0.212318703201112	-1.17906714376471	0.238371440537954	NA	0.308968098847979
LOC412164	247.209585632197	-0.287500931575913	0.174448279513217	-1.64805828052968	0.0993407122726927	NA	0.211551443052171
LOC724538	233.392312424083	-0.504628688101259	0.211339472725031	-2.38776354267629	0.0169512442240036	NA	0.109382956255365
LOC100576871	134.306104430743	-0.294660153033767	0.224421134440859	-1.31297862729331	0.189190150131073	NA	0.27958801742028
LOC409564	1356.73660961438	-0.275927447422371	0.154195462229443	-1.78946541897446	0.0735398918864288	0.24657159117442	0.188125010196833
LOC412674	242.772692577387	0.126884884974854	0.174142658546331	0.728626093307836	0.466230412709171	NA	0.424967272041708
LOC724760	518.451694235676	0.196533505009632	0.15812568032104	1.24289428896441	0.21390679049226	0.415537016085905	0.29232930711106
LOC551620	2327.22922195685	-0.335987179601517	0.170736160603311	-1.9678735799978	0.0490825853791146	0.206283411355537	0.161444612252886
LOC552549	291.714738302854	-0.591902079514317	0.210606762000264	-2.81046094575812	0.00494705924537321	NA	0.0772752112447627
LOC724875	431.50402397536	-0.444714873314588	0.199405722687882	-2.23020115631623	0.0257340915384873	NA	0.12604985922652
LOC412343	219.047126078113	-0.152856228931554	0.176650779556447	-0.865301751372744	0.386873189814532	NA	0.389837342586068
LOC552502	1113.23425351254	-0.0918784646217864	0.149022564241704	-0.616540623155338	0.537537769330554	0.712886070382794	0.455254412139351
LOC409102	1016.15957778841	-0.100159440696624	0.155908222347011	-0.642425647530602	0.52059685139862	0.698958419533954	0.448722179021087
LOC102656283	388.577137285099	-0.261370687198579	0.170687030784179	-1.53128615570718	0.125698685607877	NA	0.23268807415375
LOC409103	1884.09337678863	0.0696531075119692	0.145330627622342	0.479273423995461	0.631744125896806	0.781239105360711	0.489472264013595
LOC725105	884.226305254262	0.0177101635565553	0.145820740957783	0.121451608599922	0.903333341626291	0.953193937330489	0.574657604037688
LOC725150	908.059023870954	-0.361154997011901	0.172131079677098	-2.09813938127498	0.0358928346128343	0.177080078641962	0.142620624673035
LOC410061	2524.99903736483	-0.0461738696903219	0.128599550151294	-0.35905156461278	0.719556514654752	0.837568100676242	0.518679993812911
LOC725237	177.301567445232	0.189172223845542	0.19980313569391	0.946793068029454	0.343744234767139	NA	0.367230951226686
LOC725279	86.6982127942812	-0.312153302749237	0.227096108472857	-1.37454272047355	0.169273257146693	NA	0.265330674569567
LOC413759	203.912800579148	-0.160850869428459	0.23321979415869	-0.689696472843172	0.490385084428883	NA	0.434709157922826
LOC406118	786.874951349958	0.241080237607916	0.157679825000586	1.52892253404657	0.126283649212006	0.31823772772985	0.233295628775247
LOC408592	7377.73687295012	0.337611521637421	0.181586276517585	1.85923478421413	0.0629938663647114	0.232365946526103	0.177813262510898
LOC410726	709.694912198084	-0.222732451932447	0.1432572507942	-1.55477262545278	0.120000230894805	0.309773245394281	0.227785635832551
LOC725494	658.917576025288	-0.314288982563758	0.170605640394129	-1.84219573185093	0.0654465245451649	0.234639774530652	0.179268700218148
LOC408594	13563.6698745498	0.141670735996844	0.132677632725613	1.06778160784515	0.285619036329119	0.491622854181062	0.334661337769807
LOC410727	609.396936834816	-0.0901886133341036	0.163212898605315	-0.552582633509864	0.580549236453122	0.744962901109945	0.472005283468532
LOC725649	80.4674715813886	0.129599677913643	0.271226199087908	0.477828758244839	0.632772090760601	NA	0.48988222036252
LOC408595	973.896617076323	0.0458402876785037	0.254347594208139	0.180226936375075	0.856974412494689	0.92645048777947	0.562889522922521
LOC107966049	37.061430247336	-0.127005567734117	0.362929723394587	-0.349945346295138	0.726379714591388	NA	0.521255041854469
LOC100578300	1158.4184237385	0.338791320218272	0.206919772135192	1.63730762276754	0.101566208972	0.284515014646349	0.213538119344443
LOC410728	61.1186606230182	0.187145138280087	0.275696282232662	0.678809074843285	0.4972588430644	NA	0.43780089229535
LOC413024	935.550572580266	-0.137271042737378	0.142002736157718	-0.966678857405367	0.333704599595705	0.537044244419775	0.362543583931933
LOC725817	288.496225218044	-0.105452007028415	0.162478310832616	-0.649022054008494	0.516324121377003	NA	0.446691682129836
LOC107964507	177.075557258095	0.221007737495405	0.182491297226266	1.21105905242913	0.225872773305332	NA	0.29967908281387
LOC413025	2185.45767753564	-0.189446136117387	0.154729351371514	-1.22437103521823	0.220812290779566	0.422158001760838	0.296091295458555
LOC100578631	1583.06534784641	-0.115619331232135	0.191339722757934	-0.604262040132704	0.545669439539953	0.719112022353917	0.458755048664449
LOC552140	926.861254955869	0.136998857694332	0.163809207943197	0.836331848584715	0.402968240828561	0.598798118301715	0.395910809588925
LOC552118	462.808897960614	0.205893843939987	0.156233356657117	1.31786097633337	0.187550191182858	NA	0.279000922764519
LOC725848	911.335993139675	0.272063897994039	0.150039818958	1.81327796769867	0.0697889596876335	0.240470132558332	0.183232157439436
LOC552094	1948.35394410138	-0.374614163259384	0.187151647118632	-2.00166105416065	0.0453211977429079	0.199518312843957	0.155982145418138
LOC726014	853.955744874385	-0.548214256284469	0.175030489308152	-3.13210720287312	0.00173556490613832	0.0636826093071519	0.0542085384496852
LOC552067	517.586901252179	0.351819914173215	0.162673440068658	2.16273728535357	0.0305613916210125	0.166052216818256	0.134493353592291
LOC552039	82.3899845431204	-0.27692481872101	0.277130895461036	-0.999256392039281	0.317670504375318	NA	0.35357927392264
LOC726060	9233.22489493417	0.103305972294064	0.138777345919475	0.744400835810812	0.45663401349039	0.646463934325163	0.420986642482789
LOC410725	3850.24099252869	0.361906646255577	0.175236605621354	2.06524570007693	0.038899758455417	0.187046236116745	0.147988988600379
LOC410724	297.11934411316	0.525027824863175	0.209177690931788	2.50996089747632	0.012074453115946	NA	0.0963966335658758
LOC100578016	50.8641707868029	-0.114796835883253	0.291330400797847	-0.394043448843194	0.693548961367168	NA	0.50908744845369
LOC550948	1049.41755974275	0.129149802279909	0.13595617108925	0.949937036658142	0.342144246388239	0.544751142398578	0.366888297399586
LOC408591	1658.15205819354	-0.330904240175089	0.167464453320744	-1.97596704024889	0.0481585103078202	0.205326851254204	0.160182457358394
LOC408590	1259.75443827606	-0.153998148873829	0.1406715592657	-1.09473549363989	0.273632533990302	0.479657837136008	0.329076608117832
LOC409733	709.82073807836	0.182084187978517	0.156324621345387	1.16478253016981	0.244107032106759	0.448793973821996	0.311838758527759
LOC100577336	259.013941664819	0.00548529561501685	0.194997046838328	0.0281301471173803	0.97755834965997	NA	0.592682790657673
LOC100577296	43.2290970182944	-0.208336594711359	0.307776335461598	-0.676909075543117	0.498463645525712	NA	0.438228326050555
LOC409734	422.552130127673	-0.114810715324008	0.162741254972596	-0.705480090732619	0.480511517562848	NA	0.431187813773925
LOC100577140	259.220044813837	-0.397695368769203	0.206647373867449	-1.92451208707012	0.054290427142886	NA	0.168167804371079
LOC552374	80.1171030509679	-0.165536809662021	0.26090548944566	-0.634470397743387	0.525773879716305	NA	0.450592308106499
LOC102656816	74.0484302637382	0.169815834758512	0.249552075858764	0.680482557294455	0.496198962610709	NA	0.437399531606052
LOC102653642	48.1872393467538	0.419849784612843	0.330652880726932	1.26975994792428	0.204170151576974	NA	0.287020643858603
LOC412613	276.136752619153	-0.179791451873365	0.192527210081815	-0.933849567533658	0.350381496697844	NA	0.370992209496399
LOC409546	365.264322995799	-0.343940892822804	0.195791363965471	-1.75667039575586	0.0789740063695308	NA	0.192372088554698
LOC551415	544.340004646581	0.11187197061851	0.154333054449218	0.724873689682083	0.468529523118718	0.656455369274434	0.426055972823415
LOC551354	154.809973266376	0.199280716548354	0.193934104114019	1.02756922233333	0.304152508048433	NA	0.345591057270039
LOC411965	295.340838427722	-0.0215628660192365	0.16749779505564	-0.128735223123825	0.897567163278535	NA	0.572968136824764
LOC726223	264.58742495845	-0.149701882878376	0.181116086232342	-0.826552108057001	0.408490971850276	NA	0.397244650041191
LOC551573	169.406564435507	-0.418692935408194	0.267662138786649	-1.56425909658419	0.117756733805477	NA	0.226045621434909
LOC551612	866.901623067733	-0.438008169734216	0.177905362866967	-2.4620290399101	0.013815348026211	0.117160627206657	0.101339180039282
LOC725882	56.9273138084056	0.13742403237339	0.294707793349176	0.466306068162125	0.640996435847932	NA	0.492814425830304
LOC551636	654.508680330624	-0.0121314572714611	0.14731845755105	-0.0823485221955788	0.934369570280822	0.969422383311668	0.582764258508696
LOC551670	82.9726743515665	-0.189932243738038	0.240862449255263	-0.78855066169634	0.430374677309069	NA	0.408826626466164
LOC725225	41.4100005068132	-0.127432122525033	0.306995992179435	-0.415093765949069	0.678073262917184	NA	0.504042254328895
LOC409218	852.499364945418	-0.308820110105134	0.156903328063598	-1.96821899137766	0.0490428460369932	0.206283411355537	0.161444612252886
LOC100576131	185.490298220612	-0.500757872239619	0.27621436407063	-1.81293204618269	0.0698423028440575	NA	0.183232157439436
LOC412112	152.783854861077	-0.272379339003256	0.214462819726394	-1.27005389256166	0.204065433862328	NA	0.286947426258897
LOC724620	799.640940493332	-0.238601002608111	0.155950639187072	-1.52997771507621	0.12602224511066	0.317763407822582	0.233049631776798
LOC551107	4876.24658827989	0.157167393764147	0.202893922478066	0.774628396181443	0.438559272916333	0.630746725075429	0.412789301466577
LOC726944	278.948395610155	0.0113411214448315	0.194527809050716	0.0583007720087707	0.953509052588835	NA	0.586382889425261
LOC411997	259.678266651212	-0.249695080240035	0.170525983598494	-1.46426412544815	0.143121795158487	NA	0.246136035154487
LOC552371	668.739340892327	0.0389660060894137	0.147440675794063	0.264282606408012	0.791562162031374	0.888333654055369	0.543560528176064
LOC726918	644.819902588655	-0.567476606679157	0.25910937185208	-2.19010452081647	0.0285166574485566	0.161223081564626	0.13174838472568
LOC412748	1391.9541612852	0.275304905559027	0.151853357048789	1.81296555380448	0.0698371343058628	0.240470132558332	0.183232157439436
LOC409079	396.886960415469	-0.0141849214157332	0.150310612282351	-0.0943707247302504	0.924814670278904	NA	0.579780850645492
LOC727390	195.412153289301	0.191712080255384	0.20558344222646	0.932526852255953	0.351064316131178	NA	0.371433533076706
LOC412495	1162.15851672467	-0.0939510576024263	0.152634408722819	-0.615530000008317	0.538204763473858	0.713237665280553	0.455536232821945
LOC550977	271.885249292459	-0.181513933445565	0.165684217409499	-1.09554148417735	0.273279481585969	NA	0.328952652251024
LOC727396	840.143803141377	-0.371822358606501	0.156304115311051	-2.37883921268842	0.0173672495163556	0.128683613310608	0.110221563672902
LOC100578820	122.537486703487	-0.0259151233973278	0.218066992691139	-0.118840192536763	0.905401965261792	NA	0.575111926328945
LOC412721	528.300136954755	-0.318847256500227	0.156799596797044	-2.03346987500824	0.0420050741071575	0.191380935753702	0.150755327765128
LOC724633	159.993285126959	0.249650622726246	0.201430574098089	1.23938793226432	0.215201868352652	NA	0.292948908009822
LOC724678	105.76079561665	0.186314590621825	0.234817821015863	0.793443145906884	0.427519681383127	NA	0.407107693428784
LOC552473	406.720726191442	-0.53972209483482	0.215268891472094	-2.50719967545699	0.0121691945489807	NA	0.0968214831549621
LOC726264	505.706938896242	0.192648153280436	0.158881356535665	1.2125283764001	0.225310187099782	NA	0.2991903430798
LOC552497	455.288086917395	-0.584837220949867	0.315397942548881	-1.85428356387971	0.0636986023118335	NA	0.178245708119298
LOC551976	1008.89902607694	-0.228960403787084	0.139095633341349	-1.64606464118971	0.0997504512288462	0.282713093495855	0.211910555504933
LOC551785	395.299680556034	0.14033271509019	0.157519795573587	0.890889393166035	0.372988511164855	NA	0.383372209019263
LOC412636	322.970015953042	0.140386340424004	0.162433899074907	0.864267503418507	0.387440957447171	NA	0.390018448421847
LOC100578479	163.829234368991	-0.167472670702686	0.201031595891262	-0.833066414063944	0.404807274087927	NA	0.396551954437839
LOC726667	528.966383723542	0.115658768057535	0.155042327340858	0.745981887921873	0.455678356248068	0.645531948720754	0.420552402210995
LOC409351	391.674583796264	-0.400747086791371	0.193462353318322	-2.07144738972539	0.0383170061444654	NA	0.146964140866825
LOC726694	404.513072656401	0.00287965165894923	0.166443685934314	0.0173010567675464	0.986196442551609	NA	0.594801058991034
LOC726722	91.0115816075093	-0.607626966618512	0.228461812852044	-2.65964346090531	0.00782234087657819	NA	0.0878158320092103
LOC409860	414.126983203883	-0.156329161796639	0.182004010013881	-0.858932513545804	0.39037775006928	NA	0.391506058582213
LOC726779	32.6991249887396	0.356053156120303	0.341677336590199	1.04207425541761	0.297377253408456	NA	0.342180322546605
LOC409859	461.593631351946	-0.272637759317078	0.182362766030826	-1.49502974346743	0.134906679805363	NA	0.239662417166712
LOC411555	738.295496824574	-0.091939049769806	0.173518280577674	-0.5298522407191	0.596214381547343	0.755181693313466	0.476976997931661
LOC107965313	185.770754920285	0.063200293284686	0.206073116862288	0.306688685292807	0.759080342857563	NA	0.533261929783192
LOC409100	1876.44374668778	0.349500917809479	0.156109156527842	2.23882394590445	0.0251673735661444	0.150518920143525	0.124935206877794
LOC726824	355.24463706634	0.185648730362519	0.159410484881803	1.16459548128325	0.244182773772568	NA	0.311838758527759
LOC551406	138.138393379569	-0.316226821696834	0.249216186423915	-1.26888556571897	0.204481881169764	NA	0.287162673967765
LOC412224	798.127732184581	-0.525435090418343	0.217212901011202	-2.41898657019108	0.0155638148113205	0.122737529207489	0.106007191309316
LOC409646	446.379136759206	0.136187010192671	0.180519179641849	0.754418508121227	0.450597961523327	NA	0.418199942104942
LOC411526	240.922160515254	0.0674830223847121	0.184207276115761	0.366342870964033	0.714109243294814	NA	0.515844723325624
LOC409093	3206.34422196256	-0.314729948881698	0.174802894920719	-1.80048476327834	0.0717841273392784	0.243828664743002	0.185747752269155
LOC409481	7461.01780261659	0.104695138404607	0.199602162732491	0.524519058167326	0.59991756780115	0.757916115782554	0.478241146507479
LOC100578657	44.0538920530191	-0.0343971358774162	0.342111672038579	-0.100543590554658	0.919912777885649	NA	0.57910272397667
LOC102655567	75.655972788433	-0.219383632141206	0.281964118390448	-0.778055141886583	0.436536506234876	NA	0.412023580295469
LOC410035	1647.44045876147	-0.11143036316339	0.190743938287608	-0.584188227231486	0.559093681260907	0.728566855952838	0.463572339701879
LOC102655275	194.29640711643	0.217640026166033	0.320407067670901	0.679261003036227	0.49697250084903	NA	0.437734443505431
LOC107964488	183.771639725622	0.00495771428982525	0.233987437945301	0.0211879506582068	0.983095726108068	NA	0.594311679233103
LOC413677	2446.73797082678	-0.185207886722933	0.143412016242249	-1.29143911072335	0.196551456077207	0.39807035065649	0.283186374474563
LOC551679	200.995365985818	-0.343946633280799	0.210030859350296	-1.63760046663978	0.101505065666046	NA	0.213538119344443
LOC409401	781.014052479835	-0.172753572729095	0.150296642350262	-1.14941737904229	0.25038391724105	0.453285865148527	0.314735474111418
LOC551705	106.913120629298	-0.573885139760944	0.363091733148159	-1.58055137963378	0.113980650238741	NA	0.223118005271981
LOC409571	1191.76864134294	0.024678496956595	0.150503987095666	0.163972379953685	0.869752887090834	0.933382856092042	0.565485534641235
LOC724719	452.822715659227	0.470007943917341	0.220237834906023	2.13409264633344	0.0328351977253239	NA	0.137460759754819
LOC107966040	58.2283424913284	0.271238822750301	0.3122797441796	0.868576421640414	0.385078855623536	NA	0.389050895581933
LOC100576106	81.2537190792462	-0.0811020470061867	0.244347681480816	-0.331912488445503	0.739955340056086	NA	0.525532078497305
LOC552440	360.047149711241	-0.023465588919371	0.154805933120443	-0.151580681995659	0.879517670859288	NA	0.568175196098982
LOC726972	1159.66068527064	0.114391392258029	0.142100037342502	0.805006067537567	0.420816178444316	0.612532298627295	0.403827905710479
LOC551730	273.480150660973	-0.241963978988045	0.178942482756687	-1.35218856506563	0.176315000797883	NA	0.270610718394155
LOC724235	1470.49940987721	-0.155158808733351	0.184914433067108	-0.839084360045823	0.401421971920963	0.59825457666333	0.395832616232803
LOC414004	3066.85797100517	-0.207681196807032	0.180559311589635	-1.15021039335284	0.25005722651322	0.453285865148527	0.314542396113202
LOC724330	210.464304870764	0.00604822822074668	0.183714752611783	0.0329218428828495	0.973736914133977	NA	0.591444820448582
LOC724495	83.224277573046	-0.0844178866436926	0.259340416542208	-0.32550995239862	0.744795151489234	NA	0.52792147316716
LOC409109	5204.9221468757	-0.29257628042185	0.156101694454354	-1.87426716567387	0.060893610706544	0.228522089617817	0.174997999252102
LOC409096	34363.828035198	-0.0784655938898243	0.146347444455555	-0.536159645163151	0.591848220933423	0.751720053473632	0.475462485518047
LOC100578708	247.844291407778	-0.0407169411853344	0.197249637673198	-0.206423401663196	0.836460192562486	NA	0.557332655605902
LOC724635	72.4278702451732	-0.0282075783793864	0.247639756827565	-0.113905694064413	0.909312551737828	NA	0.575422172048751
LOC724680	306.181424150788	0.135345133980115	0.177365429495444	0.763086326152365	0.445411914294105	NA	0.415864685486405
LOC551031	7627.96006529262	-0.163633567199291	0.130819464586906	-1.25083501691436	0.210994676353207	0.412856989689104	0.290913262321401
LOC409718	1024.32817441044	0.223999285131546	0.153162160896117	1.46249755044573	0.143604915115711	0.338141291449251	0.246267705798113
LOC724625	223.580714695256	0.135872040515873	0.194124765495304	0.699921208760767	0.483976511551794	NA	0.432105950902353
LOC413000	1460.80758730456	0.58528170386809	0.174344207803377	3.3570470234845	0.000787797130522996	0.0456082018764113	0.0386919041896504
LOC102655469	34.8908664015883	0.105506406983278	0.3755635819272	0.280928215781396	0.778765458696781	NA	0.539830765274752
LOC552040	460.250309827577	0.378437697189256	0.228579373741131	1.65560737609616	0.0978013554692747	NA	0.209913246357358
LOC113218781	136.207058073606	0.357208690892135	0.211351230393437	1.69011881419938	0.0910052261538223	NA	0.203988093952791
LOC409717	3351.41074080222	-0.211057948381325	0.155770285833757	-1.35493073824473	0.175439625191353	0.374512710216743	0.269795123840587
LOC552095	174.584075396926	-0.338254225758912	0.232049924260526	-1.45767867340111	0.144929133011501	NA	0.246790114010925
LOC409258	722.627233577542	-0.00840404631078984	0.162047019485558	-0.0518617765230717	0.958638831182652	0.977307398028604	0.587495521463984
LOC409259	388.730665598327	-0.280579373262903	0.193690948283988	-1.44859311056457	0.147451246315038	NA	0.248794157557296
LOC552166	5477.79418642968	0.0579196725949139	0.133439106855579	0.434053209435825	0.664249802334037	0.798939789954125	0.499169052270762
LOC410723	143.549273798484	-0.233686456410207	0.234588412048005	-0.996155156898313	0.319174763805347	NA	0.35413016645903
LOC725190	3022.21253719761	0.00552038925108504	0.220596756295146	0.025024797933561	0.980035183909453	0.98974424238568	0.593448593881447
LOC113218632	4340.8200459324	-0.322838291601152	0.199825380968392	-1.6156020323175	0.106180384235213	0.291058360100602	0.217944570090994
LOC552229	3114.8373807597	3.32924280633795	1.86725180768213	1.78296402908327	0.0745921589750179	0.247983470821708	0.189213837494912
LOC100576446	222.122723055704	0.397634153967855	0.194387691796324	2.04557269183735	0.0407984305085714	NA	0.149519729366739
LOC102656359	388.942422850849	-0.147128648145857	0.211501240658701	-0.695639645836775	0.486654531256318	NA	0.433225765027317
LOC102656491	628.247918492241	0.225297184187505	0.180809700737546	1.2460458884036	0.212747548825171	0.41498196630678	0.291842868400014
LOC100577918	29.1887476611281	-0.121453430574532	0.407085358303523	-0.298348805962155	0.765436957624566	NA	0.535193193004758
LOC413240	215.449987808719	0.0321564194956911	0.186787889382929	0.172154734452661	0.863315883170132	NA	0.56435264127529
LOC413239	719.215708170262	-0.163182929009533	0.153554087546226	-1.06270651349746	0.287915066118857	0.494121429679082	0.336322001088592
LOC409739	556.991926794489	-0.162230291954399	0.148543223828551	-1.0921419892007	0.274770695884956	0.481146159028607	0.32958096759858
LOC102653708	62.5612927674464	0.332611895553973	0.277237555890358	1.19973606925577	0.230241860016233	NA	0.303027881218445
LOC100576586	2255.00933749107	-0.486819039590301	0.183043514087981	-2.65958093088351	0.00782379308714203	0.101165849820775	0.0878158320092103
LOC410718	2855.93209523228	0.465829078520863	0.158040479991944	2.94753014255974	0.00320323521862003	0.0772691517736009	0.0663990353800023
LOC107964845	895.610870962192	0.476718178667097	0.160011820506745	2.97926851377209	0.00288937456491174	0.0766176215992134	0.065306832907097
LOC410719	268.454721466448	-0.221271834864366	0.197236037818167	-1.12186311037316	0.261920647646664	NA	0.321688883400556
LOC725489	853.77148243581	0.461790324232654	0.283454874364567	1.62914934967292	0.103281406316063	0.286731372266207	0.215500486832564
LOC725818	467.451103311301	-0.173487664224683	0.192837880189822	-0.89965552439131	0.368303598866807	NA	0.380907012309358
LOC100578389	270.447743460183	0.0748330247817159	0.17697733237163	0.422839601992508	0.672412291763731	NA	0.501815545968117
LOC725885	3237.25309557353	-0.17552329687369	0.200069822501209	-0.877310204404414	0.380318171128226	0.581458274309422	0.387215011238263
LOC100577905	1458.2109538428	-0.626940265707555	0.20991055154665	-2.98670200753689	0.00282004457618054	0.076495941058638	0.0652461350189059
LOC724279	503.805969120411	0.419466449259161	0.169601561869109	2.47324638191061	0.013389180021528	NA	0.0999907460098893
LOC411976	529.310689357349	0.190987009540481	0.159252428540223	1.19927219503747	0.230422123035769	0.434314429557799	0.303027881218445
LOC726238	4487.36335171859	-0.0978400223292812	0.159988830558868	-0.611542830755806	0.540840272353087	0.715224078200924	0.456520013426927
LOC411781	36.1786645699638	-0.640441815793182	0.349792120797774	-1.83092121781509	0.0671123028808689	NA	0.180410943847431
Slc35b1	1113.48465783145	0.0651550850905857	0.160394692370444	0.406217214096493	0.684583006901473	0.814149388103587	0.506667547211484
LOC409298	380.686512199994	-0.0354291501757795	0.160541343948664	-0.220685521276741	0.82533730587867	NA	0.554067941046138
LOC100577753	626.997318270102	-0.278613515322199	0.148275214164981	-1.87902959298507	0.0602404526039319	0.227843244953199	0.174315503870858
LOC411983	3400.25033144981	-0.0582581422071695	0.279720296098316	-0.208272846195948	0.835015932345139	0.914785650353549	0.557051171545127
LOC411715	665.849633092541	0.0644503383352244	0.161491772729933	0.399093633351877	0.689824213261533	0.817694986071956	0.508338256678096
LOC100577872	269.31166351287	-0.441176400833332	0.272224764074483	-1.62063287053716	0.105096398303364	NA	0.217260909832514
LOC107964025	1121.46868389935	-0.0462652754942263	0.171631832751986	-0.269561157463611	0.787497886271189	0.885858738521812	0.542685930288265
rtGEF	1250.22034618992	-0.259825974804396	0.151702366855509	-1.71273514177845	0.0867612769420034	0.264964896191705	0.200645019008051
LOC725527	45.9317554531426	0.36623173221399	0.337252575906201	1.08592716076348	0.277511219257078	NA	0.330196163064509
LOC413631	195.050700130487	0.137635579553231	0.189916417720653	0.724716594832145	0.468625912342647	NA	0.426055972823415
LOC107966041	158.130472734561	-0.52392610680767	0.225481076934137	-2.32359235609252	0.0201473525080502	NA	0.116229331720317
LOC409138	2585.80857719267	-0.259151988202912	0.142129698447776	-1.82334861069261	0.068250608260389	0.238018398687906	0.181508497193767
LOC412436	501.790706954136	-0.337910309732142	0.159853121928715	-2.11387995214025	0.0345255219362471	NA	0.140778888936807
LOC100576414	54.8558574990884	-1.21368497164957	0.333812521441831	-3.6358281780663	0.000277088984825723	NA	0.0225461891776238
LOC724636	858.152434951311	0.544705433065601	0.164834376693321	3.30456209434419	0.000951249012513592	0.0485920377921649	0.0416976349798802
LOC409238	1436.95210413359	0.138834271946478	0.143012092158951	0.970786944310765	0.331654385274798	0.534952080866975	0.361112567282102
LOC411850	911.722936663833	-0.451327953224857	0.188922175638954	-2.38896228935761	0.0168960365438143	0.127365608807711	0.109382956255365
LOC100576230	50.2669033160297	0.0343793109988682	0.29032563855403	0.118416379518167	0.90573774811101	NA	0.575162888947655
LOC412191	1991.97409396697	-0.132679672817959	0.130541245469381	-1.01638123905505	0.309447876035523	0.513898582466153	0.348396282777094
LOC100578952	93.5615998505499	-0.504411978396448	0.276642907742603	-1.82333240534678	0.0682530611445	NA	0.181508497193767
LOC724411	1119.47368245425	0.0624939921285883	0.134394963192419	0.465002487028572	0.641929675577826	0.787711813418997	0.492814425830304
LOC551703	140.38739011044	0.270742634402926	0.210796791389287	1.2843773978653	0.199009937414688	NA	0.284440344697041
LOC551676	1036.82555854464	0.0878454095294866	0.144892821547428	0.60627854845612	0.54432980085649	0.718282748839602	0.458159717639917
LOC102656429	218.137246776619	0.311433322814698	0.214069866731223	1.45482093098942	0.145718842001933	NA	0.247171576041167
Tret1	10784.4682816833	0.153653345634046	0.136039702942521	1.12947428074705	0.258697813183842	0.462679254781463	0.319547371661052
LOC726405	446.628363670215	-0.325319283288724	0.214481088915374	-1.51677373951175	0.129323819364061	NA	0.236166350234147
LOC726368	719.997337584154	0.194482870818029	0.152122759589567	1.27846004991463	0.201087262352291	0.402916886540678	0.285450775504912
LOC409579	141.975081817657	-0.334769500940989	0.208053504557645	-1.60905485179287	0.107604348196423	NA	0.218656555593578
LOC726320	195.212490719511	0.281706201977535	0.233320353269359	1.20737945931496	0.22728604233687	NA	0.30065741552144
LOC100578782	386.834677223135	0.529596358129805	0.29332420655116	1.80549830631668	0.0709967403105927	NA	0.185277882156499
LOC100578721	403.656649815554	-0.153806348089665	0.162058585081667	-0.949078680479386	0.342580596616923	NA	0.366888297399586
LOC552091	561.220732017341	0.0296080750642803	0.1470199962141	0.201388082075334	0.84039513343801	0.917524684281579	0.558559701947645
LOC552065	383.763295089358	0.0574249708575313	0.176754637679234	0.324885228537784	0.745267936908184	NA	0.52792147316716
LOC726220	66.2522531582456	0.301238139959146	0.282167691043205	1.0675855157103	0.285707520102013	NA	0.334661337769807
LOC552036	1009.81035768429	-0.0586212990211165	0.156422850777417	-0.374761735448309	0.707837674343911	0.827525897146274	0.513961947773462
LOC724681	407.579419218671	0.171232683492864	0.17085617485178	1.00220365837764	0.316245241270016	NA	0.352846695602021
LOC410717	9298.16115878783	-0.104730856788521	0.147117931200642	-0.711883697206745	0.476536798273086	0.662404497235124	0.429883624506119
LOC408589	2540.75025397058	0.321153471967719	0.161589812035993	1.98746113954377	0.04687131819084	0.203062446913134	0.158531260570735
LOC724761	1648.84256515952	0.21686512023952	0.170691941714125	1.27050590708451	0.203904480048991	0.4061253451251	0.286869085494404
LOC724618	3493.73746571796	0.256153064476419	0.162091614950273	1.58029805894032	0.114038624187703	0.301495351456962	0.223151363563045
LOC411474	524.264472737283	-0.25067117480487	0.19113002874208	-1.31152167168424	0.18968157684533	0.391452185704733	0.279636235466618
LOC409075	776.306491970153	0.0173209295590153	0.148139037282969	0.116923465122361	0.906920703211507	0.954861710316286	0.575310969223681
LOC411473	243.202334450394	-0.180567802963079	0.172408526569616	-1.04732524867422	0.294949594898072	NA	0.340659859005161
LOC409074	643.010330582452	0.287314595652278	0.181156275458876	1.58600410018642	0.112738379456044	0.300046910442273	0.222293836260329
LOC725421	230.330138421367	-0.573555325277986	0.187679264221998	-3.05603992884132	0.00224281386100251	NA	0.0596878426051563
LOC411472	707.181421107444	-0.145778035427907	0.151565713943354	-0.961814064903821	0.336143011631973	0.538573046681191	0.363382331001992
LOC725068	5327.47926051857	-0.218640845928929	0.17952233501885	-1.21790330939029	0.223260718467429	0.425754824597948	0.298040816146196
LOC412081	651.71710574999	-0.421888280275942	0.162556207919821	-2.59533785682324	0.0094497977976874	0.106491538304407	0.0917123945390962
LOC726218	294.198237754855	0.0680918381262993	0.188637670460523	0.360966279747127	0.718124654854304	NA	0.517853278009455
LOC413374	527.904976085477	-0.182551556226447	0.162143081073463	-1.12586707380833	0.260221788085089	0.464208300684246	0.320741684140096
LOC726172	1394.98534666976	-0.31408175367425	0.154964104896973	-2.02680326442737	0.0426825364934452	0.192924440994321	0.152005406973765
LOC412918	1286.83746169348	-0.449630395540114	0.186875931558597	-2.40603694542187	0.0161266337228132	0.124372724022122	0.107346653067904
LOC726113	60.8222236219115	0.0839763741243497	0.271946048414185	0.308797920080274	0.757475251410842	NA	0.53254889541525
LOC411995	461.919527963316	-0.401505463611406	0.210879518467284	-1.90395665984838	0.0569158289072684	NA	0.172094117798944
LOC411996	578.348082233464	-0.391334709519526	0.267400396009378	-1.46347842172156	0.143336513881626	0.338059284776764	0.246267705798113
LOC552186	118.662749616464	0.234883773549597	0.214656663057125	1.09423006117955	0.273854090303837	NA	0.329148856188091
LOC100578370	286.404769125735	-0.156576335310681	0.179242108769887	-0.873546603447382	0.382365216076803	NA	0.387890732217374
LOC725028	236.159831133545	-0.125606209085649	0.193582867091195	-0.648849823194721	0.516435449871214	NA	0.446691682129836
LOC409832	2669.15689159591	0.00372097581200585	0.19077511413514	0.0195045136199998	0.984438636380908	0.991057862083446	0.594431700712125
LOC413228	736.21838566124	0.214394157779167	0.16616797415466	1.29022550145325	0.196972374368979	0.398534039846274	0.283406236354383
LOC409911	3781.0967859001	-0.247985969949246	0.15804679194655	-1.56906677380147	0.11663238083562	0.304887295357172	0.225232928415408
LOC409910	4132.49003036706	-0.0428171999216328	0.139791080137899	-0.306294220485278	0.759380639280912	0.866779898989937	0.53335278833832
LOC409909	1407.67421790306	-0.0625410209040098	0.141887103619122	-0.440780164713866	0.659372154636566	0.796816703296753	0.497910760752604
LOC411704	214.737532285408	0.0250364305926456	0.181082944542714	0.138259462567663	0.890035361944245	NA	0.57124668539983
LOC411705	1217.96533309631	-0.278516733813127	0.170171473988644	-1.63668285456418	0.101696753277553	0.284515014646349	0.213587081436315
LOC552264	477.238862427972	-0.321483372522037	0.1925639734494	-1.66948867310589	0.0950205733150251	NA	0.207206078770074
LOC100578901	103.510493535669	-0.21301304686552	0.228812515031915	-0.930950157319012	0.351879347364913	NA	0.371696615487808
LOC102655679	511.05187569234	-0.151106363491616	0.180554215913141	-0.836902991865384	0.402647098506135	NA	0.395910809588925
LOC552243	3084.52800684344	-0.0599180295138305	0.167986683273754	-0.356683210514889	0.721328975963332	0.837839490824071	0.518996918036254
LOC552221	1522.73000473416	-0.229544747633863	0.180321581217529	-1.27297434995844	0.203027143962163	0.405493955420291	0.28629973333246
LOC725819	646.217089201107	-0.0231169297508941	0.149299517571352	-0.154835930664319	0.876950664209766	0.938093073170437	0.567458283064466
LOC409193	1324.52039225875	-0.729447224149302	0.308949426736537	-2.36105705666628	0.0182229266744285	0.130612448430165	0.111846429327517
LOC725946	245.890258597909	-0.415880163016814	0.201356719052696	-2.06539004495786	0.0388861097437266	NA	0.147988988600379
LOC413650	681.60370111044	-0.406140310527518	0.182525111792633	-2.22512018504575	0.0260731710391498	0.153622845553557	0.126585046545791
LOC413649	90.7303152776737	-0.224577800509701	0.246692984976916	-0.910353411673684	0.362636158890147	NA	0.378081255681135
LOC410009	104.854450938727	0.693958922266063	0.276853765009468	2.50659015687336	0.0121901965371343	NA	0.0968214831549621
LOC552032	142.979602248142	-0.0970229643461734	0.20726780141747	-0.468104373581663	0.639709951777325	NA	0.492814425830304
LOC409282	2075.80573629625	-0.334108644671113	0.171917778005654	-1.94342114321723	0.0519652946946797	0.212861612796509	0.165091532455335
LOC551978	376.006788329226	-0.285569253400382	0.196426548344133	-1.45382208162653	0.14599563976747	NA	0.247339492193372
LOC107964283	962.995992743347	0.219686489491062	0.146169687133108	1.50295518722023	0.132850600298324	0.325161954055988	0.237850961875316
LOC412117	571.720652030737	-0.373722815814209	0.202604856469553	-1.84458962300527	0.0650972576552717	0.234371718689212	0.179253729230621
LOC726115	646.857455291615	0.00860929680897168	0.178727200726597	0.0481700422429908	0.961580725288361	0.978711558650273	0.588161377270983
LOC412197	6739.98041944231	0.296827526620738	0.163134511702626	1.81952625181984	0.0688311814754071	0.238900871275953	0.182157346693064
LOC412196	134.981938226402	0.094460800515891	0.217454847047594	0.43439271093928	0.664003289950595	NA	0.499169052270762
LOC100578255	38.3704634349473	-0.465720859743779	0.322493442202213	-1.44412505433756	0.148703801638548	NA	0.250139254108084
LOC726325	1041.47462479087	-0.391156104823651	0.176340113060978	-2.21819130108184	0.026541791615361	0.154700972828295	0.127406432535046
LOC726348	365.74871696778	-0.00236198111787509	0.16040889717021	-0.0147247513045912	0.988251772812382	NA	0.595447804162244
LOC411982	698.272487131238	-0.0674232180447503	0.15696503312257	-0.429542916046156	0.667528169157856	0.801550694270854	0.500293647516698
Gtpx1	3431.88397937803	0.196784625766526	0.14130935800223	1.39258028306534	0.16374674876476	0.361985044388077	0.261632897612969
LOC409261	567.293153982608	-0.206513005340518	0.170681564489351	-1.20993152340951	0.226305169835022	0.428994113752875	0.299878584116957
LOC726369	169.371529393555	0.0342134127493238	0.189063483939705	0.180962563665838	0.856396960688908	NA	0.562821684504604
LOC551699	168.629215419157	-0.0901548648130831	0.194935414384625	-0.462485819201634	0.643732969331803	NA	0.493310749970515
LOC100577833	837.809774749553	0.33237255523216	0.290027162450487	1.14600492044914	0.25179311614009	0.454487837499543	0.315325574497983
LOC726447	103.348677984777	-0.338185916443483	0.244225515922392	-1.38472802551454	0.166135646184395	NA	0.263354852343505
LOC406132	107.950157932998	0.0864345048298037	0.277758724814097	0.31118556181324	0.755659558526868	NA	0.532110343512216
LOC100578881	41.5835898340113	-0.324640107549555	0.368862617697276	-0.880111163273221	0.37879909224753	NA	0.386502620933695
LOC726542	53.7018932710727	0.292489744368572	0.28604571008384	1.02252798786195	0.306531073052919	NA	0.346629931957485
LOC551671	29.2301694602004	-0.203865815721477	0.4035631869638	-0.505164549956247	0.613443266856417	NA	0.482650923531964
LOC551109	89.4766240679063	-0.551694694768448	0.252577436962428	-2.18425961322315	0.0289431766557937	NA	0.132151031220468
LOC551156	286.19637565362	0.105416764606682	0.184223973150454	0.572220665985687	0.567172488508429	NA	0.466827855471303
LOC551205	1860.46246048341	-0.403453971144176	0.162000229817648	-2.49045307897597	0.0127580340278771	0.113583342494345	0.098020065154306
LOC724281	63.3231653430705	0.177241640241079	0.33368559140408	0.531163600727508	0.595305414064656	NA	0.476844277814191
LOC724412	81.9541834013775	0.36684131887633	0.242526107436752	1.5125848625266	0.130385141656602	NA	0.236919888592903
Msx	36.6589244989328	0.787415742775522	0.403385693518008	1.95201702843824	0.0509361829406242	NA	0.164020498094689
LOC102655896	4491.92815757801	0.161883767266973	0.141625874384903	1.1430380781058	0.253022781703866	0.455826720933715	0.316157217644137
LOC724587	298.618231768973	-0.627249410780155	0.207012362952736	-3.03000942471907	0.00244546107477439	NA	0.0611551377397026
LOC410710	3238.54524799577	-0.0177316447547125	0.130541282225397	-0.135831703599299	0.891954327479368	0.947837907468286	0.571872385232736
LOC413670	597.499197448104	0.152066975366137	0.207014233883291	0.7345725581936	0.462599855701955	0.651722444340652	0.423570153690905
LOC724762	221.351764903984	0.122003433476966	0.208096004596513	0.586284362900306	0.557684437447038	NA	0.463249339742869
LOC413672	451.122330862171	-0.2339788050016	0.168009523819777	-1.39265203353941	0.163725040062038	NA	0.261632897612969
LOC100576435	873.462616589459	0.379358667296864	0.165304785480325	2.29490432593687	0.0217386078492503	0.142698506272031	0.12009480908628
LOC413674	440.266515985528	-0.00199790909132548	0.164059979638155	-0.0121779186839594	0.990283666858076	NA	0.595996625065544
LOC410021	1001.30914778404	-0.0180121927482471	0.277138375735966	-0.0649934990071806	0.948179176353087	0.973745029263269	0.584877754974474
LOC413675	159.425861498202	-0.486824444324216	0.248005582856585	-1.96295760247354	0.0496511006677062	NA	0.161915529056754
LOC410022	7336.52648106945	0.254512084971358	0.182269129860819	1.39635321222911	0.162608157097919	0.361517981627837	0.261268562651884
LOC412626	134.557381055364	0.311595256790796	0.243450240668319	1.27991352949747	0.200575548823233	NA	0.285128946078123
LOC551843	1238.92510714688	-0.328247192576524	0.171405506462228	-1.91503294935778	0.0554883017124464	0.2194840246987	0.170240751754209
LOC409690	10306.9761723109	0.136665663497205	0.127883413040444	1.06867388231173	0.28521664415219	0.491542906559341	0.334661337769807
LOC412949	37.9570438280158	0.154032879668698	0.344287956454396	0.447395492003221	0.654589530123822	NA	0.49653526413054
TyrR	1107.11866587989	-0.0450788743289574	0.162422313096877	-0.277541142404923	0.781364619022866	0.881904126799398	0.540918540373949
Ks-1	30.1724803237923	0.0779430823070238	0.376037520062802	0.207274748259181	0.835795293877911	NA	0.557230156197738
LOC412948	1715.03230798985	0.20229586817299	0.164434391847176	1.23025278289108	0.218602459746187	0.419801804607671	0.294913655156958
LOC409689	220.47637259378	0.262239626293523	0.178734834767733	1.46719931027606	0.14232184451572	NA	0.245457188633192
LOC725230	163.500587074364	0.384607014841319	0.267834579943515	1.43598714894257	0.151005998091454	NA	0.251907349388021
LOC725272	106.744561659159	0.407758674281168	0.303978838431494	1.34140480431194	0.179789058594095	NA	0.272793946674117
LOC725308	45.7409844589905	0.108846291561482	0.355019262830984	0.306592635829174	0.759153459624083	NA	0.533261929783192
LOC725344	81.3875302464785	0.394304837070662	0.284395752277191	1.38646528266831	0.165604874201022	NA	0.263059823143068
LOC725238	309.583983100139	0.380406286918003	0.264657241408698	1.43735453786643	0.150617279572742	NA	0.25169756634513
LOC725414	84.5524541687437	0.280948385986783	0.351378711505161	0.799560066639541	0.423965731974276	NA	0.405636473215472
LOC100577019	7857.49024984294	0.191504337825843	0.134413580885404	1.42473949852666	0.154232516928692	0.351044996301846	0.254318464246615
LOC408587	3527.91222539657	0.508231108739783	0.196471844413077	2.58678850528446	0.00968750330883624	0.106491538304407	0.0917123945390962
LOC113218581	296.861707771417	0.175223378665186	0.233809540161737	0.749427840044405	0.453599376241972	NA	0.419557032519839
LOC408586	725.767501043026	-0.137542165952863	0.165986148198756	-0.828636409998301	0.407310178597909	0.600727172375041	0.396801982334693
LOC408585	203.431865588945	0.0898941858733312	0.195541762385987	0.45971860321012	0.645718214722701	NA	0.493796878088037
LOC725495	69.9742894855767	0.400653995615225	0.333648266210317	1.20082744671801	0.229818142743101	NA	0.302703590318344
LOC550899	3261.02854943044	-0.228718278150824	0.175851817388631	-1.3006307330072	0.19338488213345	0.395317298540254	0.281709621891748
LOC100577273	700.074236848519	-0.100024718759758	0.167702138001013	-0.596442716545174	0.550879511053887	0.723005934619128	0.460995220126848
LOC102654970	1619.5498931733	-0.151872204603237	0.153368498167686	-0.990243801156525	0.322054968102352	0.526064076101872	0.355555667290268
LOC100577239	727.868534421266	0.111300416355318	0.189955675070456	0.58592835572844	0.557923661168707	0.727697367616258	0.463280367359543
LOC410706	3444.78296005683	0.135847274940285	0.159765693650523	0.850290646485361	0.395163515546188	0.594319357291842	0.393550741725826
LOC413562	4896.45686248405	0.423124022878283	0.255776327901606	1.65427358485283	0.0980719375530418	0.28004836353158	0.210245681091811
LOC551206	81.874063959888	0.558374852595715	0.274839413019546	2.03164039124186	0.0421900745114805	NA	0.150887213646728
LOC724237	43.8642968902745	0.151011397242388	0.329035999807419	0.458950988131307	0.646269362410279	NA	0.494004518451968
LOC413560	79.6881418790126	0.440446947059224	0.409487771707831	1.07560463947989	0.282104111613703	NA	0.332869804782236
LOC409970	666.561192624063	0.266763025106677	0.19337202557247	1.37953266154676	0.167730583143087	0.365886243607663	0.264321109388015
LOC724374	38.7079305296826	-0.241487530150186	0.34008358967862	-0.710082866328224	0.477652750577021	NA	0.42998678101379
LOC413558	235.548640762076	0.182892430377213	0.193779628955114	0.943816599109996	0.345263376711957	NA	0.368203876403237
LOC409706	872.129712631286	0.0736602831561591	0.13598970481572	0.541660732744264	0.588052245262956	0.748406211273626	0.473863525259599
LOC551529	1235.11781520935	0.179554781807239	0.161554349693555	1.11142028764826	0.266387483740547	0.472103858939369	0.324760766603118
LOC551558	7175.07242671883	0.603867085186855	0.145585390245038	4.14785497480533	3.35604870139812e-05	0.00809553525637258	0.0067763086344484
LOC409704	866.031027873907	-0.0749259374982742	0.17543553928364	-0.427085286163917	0.669317209546313	0.803254650041485	0.501072413426444
LOC113218641	67.261433523743	0.0827447814763865	0.287777317776672	0.287530588288407	0.773706084209766	NA	0.538076512914278
LOC724835	601.212931735819	-0.23055801334482	0.155310685776508	-1.48449549489848	0.137677517447423	0.329561031517513	0.24104237442203
LOC724903	235.812124464564	-0.129341619584545	0.228111667583454	-0.567010100600075	0.570707319223281	NA	0.468569537375247
LOC408583	10020.9843994949	0.240029779721843	0.20474044862882	1.17236130588441	0.241052027716158	0.446331728931155	0.310743313108101
LOC724991	2975.26441890376	0.153918810676369	0.14374007553939	1.07081348120058	0.284253304012445	0.490161972208911	0.33417088767349
LOC410705	23.55903088493	0.173012808444787	0.572406667143524	0.302255054624313	0.76245763807237	NA	0.534618532659162
LOC100577365	53.4133247354385	0.494863879800474	0.290385775863171	1.70416019286583	0.0883511637843081	NA	0.202208405800877
LOC551157	1813.05823212273	0.25393506910279	0.151310594475171	1.67823720462918	0.0933008013824498	0.272986188501512	0.20621216946469
LOC410702	772.707309709237	0.0149505829489486	0.155818705987019	0.0959485759700386	0.923561414470718	0.964199004960774	0.579582829298098
LOC725320	925.633845662355	0.136979838664692	0.148220797268489	0.924160719609168	0.355402643523232	0.557298041956618	0.373464541626751
LOC100577522	447.483459908033	-0.0346748484904078	0.176593097415234	-0.196354495152632	0.844332710497248	NA	0.559689410551411
LOC551356	79223.6462370063	-0.245549407377912	0.197639376056019	-1.24241136699558	0.214084823810265	0.415537016085905	0.292364095592114
LOC102655530	32.5585442709298	0.338341326682444	0.349150818341491	0.969040623446354	0.332524920963586	NA	0.361694433053924
LOC551280	1971.14042604973	0.503236809252886	0.17897186329685	2.81182080793447	0.00492619386597947	0.0859017420324612	0.0771795111385019
LOC724904	111.709459543527	0.708120801279847	0.23270209295474	3.0430358072352	0.00234204463176402	NA	0.060511985017224
LOC100578281	613.441209495746	-0.24633677143843	0.158156962268636	-1.55754617378156	0.119340866832171	0.308965624521308	0.227246146714761
LOC413018	1185.08141343256	-0.41489500331834	0.233093555578744	-1.77995055370881	0.075084053213233	0.248571540553682	0.189672272767405
LOC551111	216.239499661581	-0.125487930560189	0.184922076034732	-0.678598971258685	0.497391994852318	NA	0.43780089229535
LOC551069	204.41111601916	-0.393618034681808	0.293280849859694	-1.34211979701407	0.179557155876155	NA	0.272536948597328
LOC413099	684.100072553368	-0.530556927690111	0.197474864340142	-2.68670612567809	0.0072160409350561	0.0991815287026055	0.087189636672406
LOC550996	381.82986744383	0.0630454156615323	0.174493897117897	0.361304416388475	0.717871892597241	NA	0.517739490422333
LOC414039	38.0616541022389	0.318392736921964	0.340439880834191	0.935239244420472	0.349665017970342	NA	0.370543594465416
LOC724496	233.364319582653	0.209452804991484	0.194402543842177	1.07741802577196	0.281293554666579	NA	0.332827246788573
LOC724540	459.78358102815	0.106748547370874	0.146436862429168	0.72897319431785	0.466018059702155	NA	0.424967272041708
LOC725348	241.722824722806	-0.29109074274934	0.19125309974888	-1.52201843071589	0.128004462648422	NA	0.235040986419377
LOC725387	4483.66340735478	-0.544454297641768	0.178577846490831	-3.04883449061931	0.00229731009011928	0.0708852008461942	0.0600842537820692
LOC725458	136.588262856621	-0.0997155921634528	0.19773127439758	-0.504298535814592	0.614051606224332	NA	0.482710887260969
LOC410696	1190.85337461911	-0.00263446757003455	0.155223583446789	-0.0169720831817907	0.986458886957605	0.992401410373012	0.594893532040263
LOC408579	1173.67541238992	0.569739930514102	0.201885677186204	2.82209188118193	0.00477115056969852	0.0855403366609028	0.0768762627933912
LOC408578	385.217718960102	0.0364919664737595	0.155846681223556	0.234152990536982	0.814866208667495	NA	0.550616354759251
LOC408577	3664.93491992681	-0.0398663139982933	0.159902762919659	-0.249315979726527	0.803116371486404	0.895974122557545	0.547494891066775
LOC102655849	69.1991950492075	0.471573201697771	0.279767372770262	1.68559041402235	0.0918747168401264	NA	0.205060140909003
LOC551647	2443.91287144336	0.229354750289422	0.165273974656912	1.38772453899976	0.165220940772189	0.363603307061756	0.262679568057973
LOC551680	646.179572295372	0.587355403457227	0.204186387971097	2.87656493311576	0.00402029470850093	0.0808424797225438	0.0717463568881679
LOC408576	3524.09867208205	0.065693392515512	0.213891890144148	0.307133629382765	0.758741661389183	0.866278278662065	0.53311004684478
LOC551731	1662.31618888262	-0.289097254338737	0.169433463256247	-1.70625830802688	0.0879599968614005	0.26596260889429	0.20156700879275
LOC551762	908.242341044194	-0.0017785397143982	0.156679966763214	-0.0113514174858491	0.990943073749785	0.995005086045557	0.596081185832721
LOC100576169	686.48140916141	-0.472910471531448	0.257437662254069	-1.83699023441537	0.0662113370504046	0.235247154811256	0.180047387929726
LOC410083	822.978867937173	-0.449605652872202	0.217516550519081	-2.0669951403664	0.0387346118742982	0.18687298306467	0.147980306803749
LOC410687	34.5644999621976	0.501024661818741	0.356763679171141	1.40436005980978	0.160211657951304	NA	0.260178533449476
LOC413245	155.305094028636	-0.082243896412121	0.221605431422008	-0.37112762031316	0.71054247971849	NA	0.514632037726617
LOC724332	326.250412061807	-0.467857908722675	0.232739482716483	-2.0102214856798	0.0444077523739904	NA	0.154639821710123
LOC551911	258.307508324468	0.00508995145339088	0.190076773209614	0.0267783978412646	0.978636483064273	NA	0.593062744617391
LOC724413	213.685120043995	0.277664754821123	0.1985325765161	1.39858535910658	0.161937359284926	NA	0.260964533342118
LOC724497	961.335935664995	0.0938807295411193	0.17134168008505	0.547915308724176	0.583750056705764	0.74643185525042	0.473026674165831
LOC100578913	42.8543135044813	0.153475904048203	0.336291340016221	0.456377806341371	0.648118322306486	NA	0.494371280333647
LOC113218878	48.5167847210239	-0.187364579391609	0.29281013244359	-0.639884206970552	0.522247882063663	NA	0.44963951334125
LOC410690	757.144494675728	-0.148653136827642	0.13793954548647	-1.07766874469093	0.281181611506725	0.48725909085307	0.332827246788573
LOC408580	383.427916307963	-0.108983624080301	0.174241883011085	-0.625473176695221	0.531660547780505	NA	0.452520387691711
LOC410689	10299.7970266087	0.0560837083962854	0.208343119337938	0.269189155727846	0.78778412485575	0.885858738521812	0.542685930288265
LOC552096	31.6356286081983	0.137240463976767	0.396718670202694	0.345939009894966	0.729388550876282	NA	0.522314160326389
LOC410688	1712.55639848241	-0.285055609172201	0.156512289965668	-1.82129856533777	0.0685614844162626	0.238536831198247	0.181973630852693
LOC552141	427.708493631739	-0.109625696586407	0.151703892137951	-0.722629426585311	0.469907584360078	NA	0.426488745091785
LOC552167	1237.87908889265	-0.2362149755114	0.162362613723365	-1.45486063629072	0.14570784731107	0.339229744249151	0.247171576041167
LOC412601	1015.56149562967	0.0346917289152918	0.169265970429482	0.204953948081045	0.837608105279547	0.915644103059614	0.557534153218637
LOC102656575	58.8803221557111	0.0712750523585167	0.277118618094275	0.257200518856041	0.797023983489867	NA	0.545661562430612
LOC102656224	4136.33958032373	-0.0280433130625728	0.155744188179815	-0.180060093351255	0.857105391388791	0.92645048777947	0.562901623108114
LOC724950	150.023590989004	0.499177700015974	0.273768419680453	1.82335749535546	0.0682492634850235	NA	0.181508497193767
LOC552251	1867.71774850466	0.393015904994419	0.147976413296516	2.65593614711347	0.00790885880408156	0.101311826788788	0.0878158320092103
LOC409027	2493.53224212889	0.295228524781049	0.167014344266919	1.76768364464085	0.0771138057278759	0.250432419200028	0.191090080793047
LOC411351	718.581042676832	-0.377759302860142	0.166628439589238	-2.26707579925355	0.023385595672743	0.147748034376617	0.123367169118826
LOC413895	1410.95644849283	-0.295928922513213	0.155924440081016	-1.89789953620774	0.0577093174852028	0.22352707985794	0.172385391914476
LOC552332	881.419852218975	-0.141819614192402	0.159141200349207	-0.891155865867569	0.372845557609657	0.57572783272289	0.383309676762235
LOC409792	5099.9319465068	-0.0021415888917744	0.14865204725754	-0.0144067231584379	0.988505495642595	0.993309618625352	0.595534859368589
LOC413501	148.619220020007	0.286096518059737	0.222193841763	1.28759877316896	0.197885666630905	NA	0.283896101995281
LOC409937	5261.2709629158	0.0946687446631262	0.17085061576971	0.554102449304196	0.579508733987926	0.744225650096296	0.471534931451528
LOC409936	693.010102084396	0.0564977264180904	0.142862500267876	0.395469254088048	0.692496607929173	0.818423858040787	0.50901715206892
LOC413499	302.054616233073	-0.165040609051088	0.164228394889018	-1.00494563782724	0.314923027144933	NA	0.352052463429996
Sergef	147.354396276215	-0.138915679749038	0.219805666398859	-0.631993169352432	0.527391340657178	NA	0.451061745424274
LOC411721	138.426674027466	-0.216656274455917	0.225653380553734	-0.96012864475711	0.33699047348141	NA	0.363977542327534
LOC725609	643.897747628866	-0.0240015410995934	0.158558634937668	-0.151373282880676	0.879681263761152	0.940087631614797	0.568213546517193
LOC411722	548.804445277611	0.157180304379803	0.154195019925866	1.01936044663032	0.308031876757846	0.512442302253857	0.347678006642687
LOC411723	1185.29055839898	-0.453299894426822	0.181220006390046	-2.50137886791136	0.0123710754643701	0.113084651929042	0.0972649606054269
LOC410686	3335.70579562753	-0.331216617722951	0.201330436308803	-1.64513932317182	0.0999410829200155	0.282991708595842	0.212165045774396
LOC410685	177.272260703808	0.418993382700429	0.243182251029559	1.72296037612342	0.0848956907686179	NA	0.199149036936642
otd2	878.833461407966	0.447337250943508	0.150550924408337	2.97133513262397	0.00296508025835156	0.0766176215992134	0.065306832907097
LOC410684	175.238949730371	0.514850348266259	0.315223145830227	1.63328852933771	0.102408328125424	NA	0.214496639629334
LOC551451	1153.11628757708	-0.136560747583824	0.164083128399797	-0.832265626061732	0.405259028426935	0.600148261060624	0.396551954437839
LOC102654681	162.734643838591	0.00189572923706354	0.209077224148808	0.00906712457457479	0.992765580418125	NA	0.596195395317257
LOC551494	1221.94766798987	-0.468993068932029	0.182940880144854	-2.56363186052607	0.0103583346662785	0.107848353441067	0.0924700793573913
LOC725980	545.18373433868	0.484696783536253	0.158690072709844	3.05436109051695	0.00225540435278392	0.0708852008461942	0.0596878426051563
LOC411700	3514.28486061913	-0.86665272557215	0.575227533155823	-1.506625944724	0.131906563300904	0.323947001047808	0.237341712586788
LOC100577704	91.5956303682354	0.202909082652395	0.275412663306788	0.73674565365344	0.461277038075296	NA	0.422670295512331
LOC100577074	193.580849560878	-0.0216334600290157	0.251089634490411	-0.0861583158258246	0.931340566591783	NA	0.581785473287883
LOC102655034	162.930608713366	-0.172626022720605	0.204872944244059	-0.84260039000055	0.39945197289965	NA	0.395007431089607
LOC551622	247.254833046197	-0.0403681309529936	0.171211810464711	-0.235778891908359	0.813604248250163	NA	0.550036330884615
LOC726034	424.370189369833	-0.148928502673972	0.156068241161226	-0.95425245755235	0.339955867069089	NA	0.365763466180399
LOC726061	421.604770907019	0.188818109029927	0.172060028667385	1.09739670795323	0.272468011893502	NA	0.328484012309525
RCC1	251.461391429104	0.428230730295088	0.180281034036675	2.37535097678646	0.017532270373959	NA	0.110497064333727
LOC726148	116.200547684155	0.337656815635289	0.212343394251429	1.59014513649283	0.111802093826995	NA	0.221800181179004
LOC107963988	50.2119254509738	-0.0117963108014947	0.29180905087178	-0.040424759842963	0.967754490879589	NA	0.590273835229341
LOC408573	526.082107413194	0.222264611622027	0.169013828760071	1.31506760868396	0.188487181509746	0.390129570977124	0.279503910301852
LOC408574	698.252918982019	-0.0578296366130772	0.147940629840008	-0.39089759639132	0.695872930707478	0.81994037045641	0.510037909139251
LOC551791	127.804364315369	0.0478297979828207	0.206353524696239	0.231785708788973	0.81670445754732	NA	0.551175322649194
LOC408575	353.999073747919	0.0449810561112186	0.156714479058705	0.287025528090283	0.774092773662284	NA	0.538208121896791
LOC412777	7441.46324323473	-0.127453078182876	0.212655176102082	-0.599341528003506	0.548945160307725	0.721612555633181	0.460186216896337
LOC412778	590.955790058605	0.10284826642612	0.173915336576911	0.591369734552636	0.554272714551837	0.725332165938541	0.462038833760157
LOC726349	3089.59656386416	0.101970414818393	0.150364657733777	0.678154137782382	0.49767396783764	0.678887957383296	0.437816491256389
LOC413574	212.566163775711	0.207489745818495	0.178652270344042	1.16141678702946	0.2454724454369	NA	0.312087705563433
LOC413575	2850.6166602531	0.150156008522458	0.14944486408677	1.00475857393985	0.315013115865811	0.519084231153454	0.352052463429996
LOC413576	62.7510380840596	0.576584325877841	0.311211240943902	1.85271047449656	0.0639238678831653	NA	0.178387330403271
LOC100578467	450.97976229617	0.525425318665822	0.234863062106096	2.23715604299015	0.0252761431658331	NA	0.125111732142188
LOC413577	741.075307883255	-0.0187507115217494	0.192153969284175	-0.0975817027959443	0.922264454208674	0.964003914341373	0.579473743598822
LOC412407	298.193237122514	-0.0478942920377866	0.174432171874626	-0.274572583274437	0.783644632391171	NA	0.541534207248569
LOC552128	1797.95081490458	0.221405346351792	0.205717756056214	1.07625783304428	0.281811961386648	0.48741895127238	0.332827246788573
LOC552153	236.12019029151	0.0252164973723117	0.171212209407476	0.147282121173366	0.882909343815071	NA	0.569017700021461
LOC726562	976.652426038078	-0.321964361444715	0.157049805030257	-2.05007807161993	0.040356812877186	0.189043738499692	0.149030345458079
LOC726591	169.35512091034	-0.362668825219323	0.205785896069073	-1.76235996803975	0.0780084977869101	NA	0.191842606564779
LOC113218556	1599.82256711651	-0.46485935937647	0.19451012929168	-2.38989795065832	0.0168530548533134	0.127365608807711	0.109382956255365
LOC414042	399.368674919735	-0.155098365301454	0.171711286844737	-0.903250847113477	0.366392777126142	NA	0.379597371527883
LOC726647	579.399667102949	-0.404963688330045	0.158487564638789	-2.55517642190416	0.0106133989330951	0.108524262968754	0.0934348539706978
LOC100576242	297.228188308916	-0.551409653575782	0.226878318022181	-2.43042022870547	0.0150813255221183	NA	0.105185926392699
LOC726708	377.471282467005	-0.168475070358114	0.179044500057297	-0.940967582384264	0.346721472178813	NA	0.369109012993052
LOC551725	2376.16384503634	-0.105259771733189	0.133635431109431	-0.787663652216563	0.430893471813336	0.623230997539475	0.409064282443245
LOC409225	1319.02732065531	0.467237381844563	0.18421326261047	2.536393825414	0.0112000699801229	0.108639341861686	0.0936471548641946
LOC409226	997.131339049376	-0.202798685748529	0.164501159521574	-1.23281006856327	0.217646633971359	0.419264278927969	0.294425618918844
LOC551637	560.241663190816	-0.369559911293516	0.170164105081199	-2.17178535459737	0.0298718568574104	0.165422591918411	0.1340338922744
LOC107966053	121.289390337484	-0.178349633347992	0.235903324095923	-0.756028487650611	0.449632115835208	NA	0.417801431485771
LOC107966054	53.1407753325575	0.5797677094563	0.365817506133856	1.5848550157798	0.11299927915155	NA	0.222293836260329
LOC725976	426.819450227612	-0.461704208668909	0.172128141451044	-2.68232843727198	0.00731116416316247	NA	0.0875333710443229
LOC412412	682.378095609451	-0.231478640453952	0.178000685937687	-1.30043678896263	0.193451307851673	0.395317298540254	0.281709621891748
LOC726766	1104.10726952815	-0.0499296922602788	0.17961546352734	-0.27798103392517	0.781026917924294	0.881752178270224	0.540808621654491
Uqcr11	2397.45780332909	0.465994436490984	0.188198744409134	2.47607622438722	0.0132835214997251	0.115123852997618	0.0996110458726732
LOC113219410	92.0379277393428	0.800288676469951	0.330132876482198	2.42414110644659	0.0153446419471095	NA	0.105548660126519
LOC102656360	42.107144085113	-0.155589367453533	0.386952877188722	-0.402088669255845	0.687618771315651	NA	0.507621815943645
LOC551665	129.701831654543	-0.209374256223948	0.223211438312318	-0.938008633459863	0.348239973330962	NA	0.369869073958655
LOC725572	349.542251366689	0.203700713812667	0.290735135493053	0.700640166752511	0.483527604863208	NA	0.432105950902353
LOC551633	598.269346425846	0.203897680529631	0.142135187018121	1.43453345232265	0.151420089879568	0.347603834737736	0.251955424585973
LOC551606	293.324220061876	0.126706140914115	0.165116669966457	0.767373402938995	0.442859537359665	NA	0.414416711697945
LOC412449	86.1465968929821	0.212900099178253	0.235524349665392	0.903940927894375	0.366026725439318	NA	0.379291563277893
LOC100578271	332.616213119187	-0.346235892920258	0.173320023569831	-1.99766816198683	0.0457526481057194	NA	0.156652066910977
LOC412362	309.01470566923	-0.0711813390159546	0.166238956295141	-0.428186873897229	0.668515071990142	NA	0.500732023344078
LOC412361	62.7274207001012	-0.097967873612612	0.25779433634017	-0.380023374459785	0.70392806418588	NA	0.512976314609671
LOC727229	403.660385627993	-0.19472154512073	0.171376487290393	-1.13622089120534	0.255864129323389	NA	0.317773692188181
LOC100578205	129.257297501475	-0.44336158354011	0.211093029005967	-2.10031371300081	0.0357012537625608	NA	0.142620624673035
LOC410678	316.613130708873	0.173632728179054	0.195656706133383	0.887435609085053	0.374844419104418	NA	0.384212072064874
LOC724195	1032.19734764062	0.222812717261815	0.162746767332472	1.36907614764867	0.170975473371254	0.369734670649809	0.266561314841617
LOC551158	270.492147149929	0.190381430880535	0.174005522031124	1.09411143197215	0.273906109175042	NA	0.329148856188091
LOC551207	663.619224720023	-0.253189007416036	0.170201500162175	-1.48758387660971	0.136860668109947	0.329027108753665	0.240600091740847
LOC100576938	59.493075157911	-0.11709182320998	0.307766472461789	-0.380456721855945	0.703606416404413	NA	0.512947619089673
LOC551281	210.013148398277	-0.0914112368791553	0.189217657522588	-0.483100985795911	0.629024034150396	NA	0.488247530839011
LOC412262	338.357823738003	-0.448283915795373	0.21741529015601	-2.06187851587485	0.0392193034287805	NA	0.148230117877865
LOC551358	186.029290686047	-0.100268519904179	0.190184570816743	-0.527216900264717	0.598042973820266	NA	0.477563556064274
LOC412406	1051.80999274344	-0.495134935361821	0.213338619654616	-2.3208874987727	0.0202929164260695	0.137890208328629	0.116575407495887
LOC551418	4453.66558355218	0.0272646054088935	0.232933852892764	0.117048703184613	0.906821459138613	0.954861710316286	0.575310969223681
LOC551452	140.059512527555	-0.0372619808454455	0.239067639386993	-0.155863758645842	0.876140412529204	NA	0.567098226361953
LOC551472	375.384777544125	-0.513306609465296	0.220136212420852	-2.33176815309226	0.0197128912606067	NA	0.115432827351817
LOC724638	145.048866215581	0.361512780376162	0.205122163746641	1.76242671085846	0.0779972289602265	NA	0.191842606564779
LOC413968	5584.0860350791	0.150034167189273	0.142747208163021	1.05104799680516	0.293236546347585	0.49911136191345	0.339465689981746
LOC408572	1622.34518134136	-0.178898503785973	0.158790658437604	-1.12663116046131	0.259898458781436	0.464012791130344	0.320633126911884
LOC107966061	53.045562927184	-0.312208133729003	0.316437315433402	-0.986635009532277	0.32382160095562	NA	0.356783541851614
LOC551584	271.429048355502	0.110451955407685	0.17546619727965	0.629477113655407	0.529036747303172	NA	0.451705560663194
LOC410676	237.920737814981	0.147299284775371	0.170093386882616	0.865990662394326	0.386495282454638	NA	0.389642168883669
LOC725042	294.542564543433	-0.160091735204225	0.181193576441352	-0.883539794006126	0.376944691810491	NA	0.385378217606068
LOC410675	1090.02823340329	-0.197230569214455	0.21222707789975	-0.929337439719267	0.352714238112374	0.554973830382891	0.371988841250469
LOC725079	456.573138343897	-0.439545260853431	0.202553791637033	-2.17001744228553	0.0300055246196069	NA	0.13419187053353
LOC100576454	203.792203303717	0.51738759027611	0.210270930758621	2.46057592654137	0.0138714217779628	NA	0.101370324702957
LOC410674	1667.35801993958	-0.184913414331896	0.214909496500531	-0.860424584966815	0.389555038507074	0.590383238114387	0.39113910965882
LOC410673	126.744285208959	0.0112310259375589	0.224531889034568	0.0500197365543469	0.960106660511087	NA	0.587647263450366
LOC725239	68.2461197726306	0.000390032732704754	0.248901237845862	0.00156701805133766	0.998749701002033	NA	0.597808833706583
LOC410672	388.881306810527	0.104408825827212	0.162559708943186	0.642279852160063	0.520691493666835	NA	0.448724707488205
LOC410671	1159.51363359257	-0.235589582845558	0.179348478387638	-1.31358562371721	0.18898568926617	0.390456596487955	0.279549267066889
LOC551893	548.256457717324	0.015394781580068	0.158636760742901	0.0970442254870419	0.922691273309522	0.964199004960774	0.579582698569467
LOC551912	429.614292364607	0.115814929970156	0.187135126887494	0.618883968480083	0.535992800400669	NA	0.454471620266382
LOC725459	175.988579987395	0.330222279841455	0.269625085730899	1.22474612829993	0.220670888199024	NA	0.296091295458555
LOC100576258	70.3006712023301	0.0755150899583808	0.280672747904771	0.269050310449101	0.787890967393617	NA	0.542685930288265
LOC107965063	45.0481397471044	0.45750720633551	0.325973327735291	1.40351116919306	0.160464463702475	NA	0.260239087864294
LOC410669	355.186101371267	0.270736917815057	0.194033984535036	1.39530669569985	0.162923373816259	NA	0.261612092145552
LOC412734	276.786499264757	0.067617623552508	0.178567982053498	0.37866600033734	0.704935904185738	NA	0.513274794358538
LOC552014	486.063542723969	0.0746365975150699	0.16637852118541	0.448595149081147	0.653723733771132	NA	0.496361966124629
LOC725684	360.256924317414	-0.0081695485972873	0.166414304791157	-0.0490916247106264	0.960846277874194	NA	0.587967933241875
LOC408570	2966.08825059554	-0.00335598503354963	0.16652227449777	-0.0201533701342433	0.983921025564004	0.990996310136605	0.594415112431441
LOC725748	118.080592857924	0.468913737250584	0.259744807557318	1.80528627948456	0.0710298955521085	NA	0.185277882156499
LOC552142	1097.87540024886	0.153778484280209	0.17932116876253	0.857559011807765	0.39113601626298	0.590781937107093	0.391729077426821
LOC408569	622.631640630256	-0.0153427707946347	0.156370296545787	-0.0981181920962989	0.921838442024239	0.964003914341373	0.579473743598822
LOC100577689	135.43827551024	-0.167958616136358	0.208313552825909	-0.806277910668272	0.420082624214514	NA	0.403444652067184
LOC411927	526.18567205252	0.162835457945716	0.170599009446081	0.954492399893926	0.339834454557785	0.542087142428326	0.365745574768029
LOC725947	92.8859717607289	0.247909125994247	0.219461008639677	1.12962720590279	0.258633342227682	NA	0.319547371661052
LOC725981	213.581877925508	-0.214242704934272	0.177185378064884	-1.20914438467839	0.226607379834876	NA	0.300142413903168
LOC113219119	189.037759949318	-0.657384005438088	0.239935881299049	-2.73983199961136	0.00614705963796754	NA	0.0825950744888085
LOC551837	2446.03335305726	-0.117925205148315	0.192220705371736	-0.61348856732296	0.539553339941282	0.714341342104533	0.456166977177429
LOC113218850	903.760930796465	0.252442956776998	0.139108800414141	1.81471593476078	0.069567574966459	0.240304224744921	0.183059529648164
LOC100577648	373.642621886591	-0.0931219066944414	0.163419544282361	-0.569833351961518	0.568790732263757	NA	0.467496795336396
LOC724146	70.1123539794781	0.445839552455323	0.288711532493134	1.54423880683023	0.12253049084599	NA	0.230025640737368
LOC724196	30.6747091910973	0.62130850148585	0.365113349596246	1.70168661916337	0.088814130098264	NA	0.202927224274193
LOC724239	510.237352956827	2.4085552468009	0.808510387512381	2.97900346612927	0.00289187506973583	NA	0.065306832907097
LOC408568	736.360714723629	-0.181239965140523	0.156298750741149	-1.15957398431597	0.246222298170369	0.450065333432221	0.312570219602901
LOC100578551	249.280118292009	0.265935086673055	0.193267376040967	1.37599574289602	0.168822951263959	NA	0.265082134794644
LOC100577533	118.343695582244	0.0330355044815236	0.208613880244404	0.158357173754788	0.87417535829333	NA	0.566536615926178
LOC551386	1020.10908211478	-0.122698713124552	0.170983838632371	-0.717604155491937	0.473001394684147	0.659316871819765	0.427990429762485
LOC551419	105.299819533457	0.305317584033073	0.265139134493831	1.15153722824035	0.249511288735967	NA	0.31429077590674
LOC412015	32.4261335477071	-0.166734654503687	0.378150630071317	-0.440921265878207	0.659269997612537	NA	0.497910760752604
LOC409313	571.59947193979	-0.275212022095545	0.155044581165009	-1.77505089199245	0.0758894844580547	0.249110709962314	0.190032535289033
LOC409312	635.9415539783	0.0604860358101715	0.138596322575496	0.43641876412142	0.662532927278738	0.798939789954125	0.499157495354199
LOC100577501	316.350959060517	-0.463460906185985	0.197384532613637	-2.34801025211621	0.0188740017959884	NA	0.113211484195747
LOC551559	927.267618656278	0.23227224751179	0.178598397816736	1.30052817019182	0.193420007748457	0.395317298540254	0.281709621891748
LOC551585	44.1425168644014	-0.175675801510996	0.337934092487483	-0.519852259409143	0.603166552028603	NA	0.479547673737254
LOC550724	976.217577448142	-0.222869617154053	0.155738950772913	-1.43104609378693	0.152417005144266	0.34886380407823	0.252791465526322
LOC412240	359.664886260863	0.0617671515019692	0.164448381665198	0.375602063556462	0.707212756423524	NA	0.51379035604954
LOC413118	552.8241615293	-0.542411518821417	0.21998277409493	-2.46569996697718	0.0136745823179519	0.116235896837134	0.100778599786056
LOC409062	553.02462768023	-0.122400654748569	0.181828249716101	-0.673166325582964	0.500841481942749	0.681709628399816	0.439428833687968
LOC410662	555.104093732247	0.291563450390417	0.180426285503343	1.61596992132843	0.106100816570594	0.291058360100602	0.217944570090994
LOC102654353	2259.34543391005	0.364734189540729	0.141871577467231	2.57087568949443	0.0101441732297694	0.106907767387522	0.0917123945390962
LOC725106	87.8671427309314	-0.0105006587024286	0.25648300671662	-0.0409409529186876	0.967342969093376	NA	0.590154886168882
LOC410791	9178.42321377623	0.186811175769631	0.150845285948401	1.23842899428447	0.215557035309099	0.417275366612621	0.293199467255846
LOC551792	3114.25363388465	0.392338502832789	0.194287775373003	2.01936793027538	0.0434489921966658	0.194979482729969	0.153589334658799
LOC113218960	164.217134730359	0.715732973259431	0.323152964271559	2.21484266707196	0.0267708654763544	NA	0.127686466624645
LOC725273	288.683840378086	0.715309085601162	0.286212778582702	2.49922134554336	0.012446654213274	NA	0.0976329715455816
LOC725283	72.1434903591849	0.748581579885548	0.384053078925966	1.9491617720629	0.0512761086230788	NA	0.164305475716923
LOC107966045	155.30019306279	0.713501320379261	0.28527851735449	2.50106922524648	0.0123818973089912	NA	0.0972649606054269
LOC550901	518.545148733814	0.268329854623047	0.163250756579312	1.64366683650059	0.100245039821676	0.283374975850077	0.212563897195769
LOC551868	108.792078123555	0.121318019170255	0.24268700433483	0.499894996449317	0.617149015611529	NA	0.483333719739544
LOC551894	517.825175470207	-0.126908908854865	0.149222246959227	-0.850469091847557	0.395064337354698	0.594319357291842	0.393523857942784
LOC725415	3152.5019445678	0.268967638494617	0.18669268337321	1.44069726587482	0.149670227674627	0.345858503759037	0.250907457842372
LOC551941	2817.02133211783	0.203797710230509	0.171939512820872	1.18528723786037	0.235903897664253	0.440607060150492	0.307339100251426
LOC408646	394.698713952	0.552203371869546	0.199532056895215	2.7674920033503	0.00564894312870251	NA	0.0796751735345389
LOC725651	486.890102898447	0.359610757139841	0.220740899942901	1.62910795975219	0.103290166491671	NA	0.215500486832564
LOC102653800	3187.05508649968	0.62977370969454	0.159818464546378	3.94055662768418	8.12927570292957e-05	0.0121714879662483	0.0113635998839399
LOC408645	1539.5481189265	0.290812619245372	0.158622772675559	1.83335982810103	0.066749077551236	0.235247154811256	0.180234380120365
LOC410788	1390.9251457668	0.432718112729347	0.163833868944537	2.64120059861271	0.00826127891861003	0.103671887469956	0.0889289274292993
LOC107963993	313.582401269997	0.309523082324491	0.246001780887471	1.25821480319314	0.208314082778215	NA	0.289144208935198
LOC101664701	1622.49997962445	0.502713034900871	0.203418328815364	2.47132614759197	0.0134612986401214	0.115768664899085	0.100142238963767
LOC724283	864.708302805199	0.0250460110889135	0.141483093067176	0.177024763496099	0.859488938303729	0.927641305024805	0.563584394822855
LOC410785	3628.42464046524	0.354117807196058	0.160555152079296	2.20558358053291	0.0274131697742294	0.157236437463282	0.128945000343026
LOC100576697	146.15529050077	0.376532774885484	0.358280168206488	1.05094506561825	0.293283820915272	NA	0.339465689981746
LOC410784	341.045813256986	-0.280439650964387	0.169072953337123	-1.65869020105898	0.097178234958453	NA	0.209191001366264
LOC724415	335.512584692444	-0.39492183832208	0.195719672447395	-2.01779327230494	0.0436127958556207	NA	0.153634727385184
LOC408643	8724.49002482958	0.168536990564026	0.153384244355735	1.09878945697413	0.271859911954988	0.477707704455103	0.328331314223097
LOC410782	1235.95356848752	-0.203481889135702	0.153080365870015	-1.32924877713243	0.183765907449356	0.384906690856297	0.276214247173188
LOC409126	1951.03960984274	0.0279149527545805	0.136336729510755	0.204750054183882	0.837767411174422	0.915644103059614	0.557534153218637
LOC409127	1612.56967266532	-0.476766083601502	0.206550555110626	-2.30822949541894	0.0209863754746821	0.140559171439036	0.118929900228253
LOC413378	326.297412930272	0.179789002140215	0.158711065734353	1.13280697415983	0.257295322063783	NA	0.31871948931942
LOC413377	1535.52541966047	-0.35357608026496	0.215539334338665	-1.64042485029394	0.100916861914083	0.284515014646349	0.213490230767539
LOC724639	254.159050935456	0.343487450545566	0.173900374342741	1.97519672883846	0.0482458270035534	NA	0.160265961636536
LOC409887	1245.17499545276	0.435648173902863	0.1578025695735	2.76071660354016	0.00576746988242427	0.0901799251993705	0.0797733365283433
LOC409886	1265.27062233871	0.0230522675271288	0.130058761374502	0.177245018201812	0.859315936003499	0.927641305024805	0.563584394822855
LOC552426	271.29069639865	0.132155552668585	0.189653207156422	0.696827407509045	0.485910811775023	NA	0.433093626136344
LOC551960	373.452806024904	0.203203626604948	0.212864284182012	0.954615883006451	0.339771982070971	NA	0.365745574768029
Gat-a	725.753903444294	0.400255953897018	0.156040050450499	2.56508475062299	0.0103150606486527	0.107848353441067	0.0924700793573913
LOC100577450	134.195727522781	-0.269784294439891	0.23805663307378	-1.13327778754343	0.257097616685533	NA	0.318619811691822
LOC410080	1876.92137210761	0.155675966299408	0.133828391221122	1.16325067408296	0.244727812114823	0.449115874979951	0.31187245393767
LOC551906	392.528623035437	-0.402147393303501	0.173332104539565	-2.32009756283613	0.0203356001560967	NA	0.116668907912565
LOC725284	78.2295634988938	-0.32885184456028	0.269261950334649	-1.2213082619047	0.221969326423613	NA	0.296957322630506
LOC551889	669.013387396401	-0.207935994466055	0.160710170389204	-1.29385709667584	0.195714786290651	0.397023329935437	0.282674408162033
LOC412088	803.697667014875	0.231405782154504	0.161189173821256	1.43561615627555	0.151111594858697	0.347603834737736	0.251955424585973
LOC725154	1146.29947291258	-0.0862372604741794	0.216867185934442	-0.397650110608474	0.690888117064248	0.818423858040787	0.508863909210726
LOC100576132	3684.57775319415	-0.161565626270914	0.159417042578055	-1.01347775406012	0.310832016653087	0.515344781944803	0.3492159050004
LOC725044	146.313975372553	-0.0216700155118251	0.196688179675879	-0.110174467766873	0.912271010754815	NA	0.576691850893706
LOC100579054	89.0212506837995	-0.139785357661681	0.242792933768632	-0.575738986682735	0.564791619187095	NA	0.465676247499344
MsrA	1445.84887227291	0.624845372499521	0.222645058662605	2.80646413737126	0.00500884876262395	0.0866217878641988	0.0773804966001896
LOC411548	878.548657431991	-0.159895034497325	0.156224854532067	-1.02349293251865	0.306074839800381	0.510163898047314	0.346275107123324
LOC100579021	114.169771041315	0.0745813724991009	0.246552937848134	0.302496385360615	0.76227368853812	NA	0.534558304769716
LOC100578953	1415.40807226152	-0.0478300620346989	0.13335370027528	-0.358670677573731	0.719841466680589	0.837568100676242	0.518766986348614
LOC409251	331.654557688397	-0.135807650138303	0.160180089780242	-0.847843513664049	0.396525126041278	NA	0.393979942638461
LOC100578883	523.63971037465	-0.45214696890615	0.251036684939655	-1.80111910342841	0.0716841093354324	0.243828664743002	0.185703725905738
LOC724798	153.735975713287	-0.514943320370758	0.227123628691977	-2.26723799428689	0.0233756909867753	NA	0.123367169118826
LOC411882	596.218588027658	-0.295416278086045	0.152478509953904	-1.93742894113638	0.0526929317416545	0.213885622973874	0.165761049505946
LOC727452	961.372132212216	-0.188740581956746	0.138700121038694	-1.36078166726395	0.173582697074075	0.372747809443934	0.26830555241906
LOC725460	846.990939151696	0.113341671162201	0.233873360765344	0.484628393722542	0.627939968800599	0.777989158399901	0.487920381014628
LOC408642	149.040615304872	-0.182629256296132	0.20192755709598	-0.904429583176333	0.365767657470954	NA	0.379291563277893
LOC551071	4309.11231469779	-0.0833906245848429	0.157205164168144	-0.530457285077795	0.595794917266385	0.755090931339943	0.476976997931661
LOC408641	719.1967772139	-0.159232085035951	0.157728637589903	-1.00953186097985	0.312719629498605	0.517268050012549	0.350573884801622
LOC725724	776.3613423956	0.129694181258337	0.201371850439028	0.644053183081844	0.519540947634264	0.698404580380177	0.448300113147597
LOC551208	230.827196975847	0.381315993762356	0.197703586556038	1.92872572726077	0.0537649205935711	NA	0.167299096194022
Mir6053	238.458078019549	0.256271841669294	0.18805841922005	1.36272464020569	0.172969309202424	NA	0.267892141228667
LOC551320	5243.76149573552	-0.124252905758254	0.144209918407604	-0.861611372714721	0.388901410615137	0.589598437461916	0.390926947859869
LOC102655568	88.0299223099545	0.273824391210749	0.312340953822908	0.876684238359605	0.380658170139144	NA	0.387232235524715
ROCK2	1244.80897724582	-0.410317942815638	0.227409152236857	-1.8043158719851	0.0711818029878944	0.243363298089321	0.185407989133233
LOC408635	638.109393778801	0.0148352162328354	0.159628607071421	0.0929358246307181	0.925954544956154	0.96561917930701	0.580146912706336
LOC551420	335.755553247156	0.115146790081689	0.194404196914818	0.592306091684544	0.553645637438527	NA	0.4620063150267
LOC409392	667.317542938925	-0.0441348041957367	0.155456119514033	-0.283905222475032	0.776483014154221	0.878047271142184	0.53901033655324
LOC726062	110.687062192526	0.178551758893663	0.251134279786114	0.710981229029075	0.477095867879649	NA	0.429959864113223
LOC100578360	319.872898547752	-0.343751300577359	0.190565832065168	-1.80384540529703	0.0712555455655493	NA	0.185455477500353
LOC412288	1882.75209414589	-0.387060291158054	0.214494977554166	-1.80451913406835	0.0711499623439405	0.243363298089321	0.185407989133233
LOC726178	4165.89665657824	-0.301572931867094	0.149975330574295	-2.01081691710425	0.0443447985699238	0.196675296619621	0.154639821710123
LOC409189	4060.44771744392	0.454855835672893	0.189973935949917	2.39430653156972	0.0166518257586789	0.126623865926767	0.108971875815322
LOC411753	729.712492014972	-0.439050610297583	0.142819416794534	-3.0741661053638	0.00211091865621262	0.0686914841212873	0.0586676756703754
LOC100577142	669.947969246731	0.271116014945542	0.197746674382197	1.37102692519389	0.170366562750238	0.369127552625515	0.266049961487609
LOC410780	1956.84948893093	0.63667279356809	0.160502860313259	3.96673799037271	7.28630160155237e-05	0.0120822918455087	0.011034008930329
LOC410779	4680.30366136678	0.361877324671976	0.18652243469903	1.9401276058609	0.0523641838169368	0.213488531580413	0.165682923500375
LOC726350	487.565480662373	0.520316189664857	0.202267995617263	2.57240987669356	0.0100993246508077	NA	0.0917123945390962
LOC408634	537.693250536997	0.260258736469952	0.187032393817343	1.39151689799855	0.164068739125794	0.362169021496796	0.261917080036551
LOC408633	317.76125830674	0.490256055098829	0.19107617876173	2.5657622958337	0.0102949351800115	NA	0.0924700793573913
LOC102653614	65.7302061254008	0.21960659776077	0.28551084985515	0.769170761364005	0.441791945363548	NA	0.414116069830358
LOC409288	1409.65901024878	0.392068957859628	0.147788910294252	2.65289836077014	0.0079803897270771	0.101318281271838	0.0878158320092103
LOC726431	610.586071075267	-0.295739165259689	0.177163474729937	-1.66930099847334	0.0950577424561243	0.275160478496328	0.207206078770074
LOC409505	295.806839214267	-0.377632019280297	0.19955611101509	-1.89236008538842	0.0584430203318902	NA	0.172970369902181
LOC100576990	125.611201920002	-0.0623760080118973	0.245866707635219	-0.253698471874613	0.799728514711849	NA	0.546799521816414
LOC552660	723.39578487531	-0.0266255750825946	0.165907023647828	-0.160484917981006	0.872499101348989	0.934712829523146	0.566202013603855
LOC726056	5141.58313591706	0.0851923867140569	0.185947996992799	0.458151677306618	0.646843474038241	0.790093802706654	0.494194020820798
LOC552654	1055.68511177809	0.537671560180639	0.204029614808263	2.63526234015546	0.00840722772834862	0.10400052078772	0.0890715515080569
LOC552644	542.567159950895	-0.156080707052101	0.164869133470459	-0.946694531393694	0.343794457870736	0.545426553333613	0.367230951226686
Mir9871	36.0904857141218	0.10773708872226	0.34778865820628	0.309777464503626	0.756730189913049	NA	0.53245159999604
LOC727436	30.7860419726366	0.326768396655025	0.3439959592222	0.949919287987778	0.342153265424598	NA	0.366888297399586
LOC113219416	81.488796801347	0.269229720561174	0.293850287433183	0.916213909174389	0.359554711601771	NA	0.376159988778147
LOC552372	284.350613189621	0.270421943673932	0.197731589767916	1.36762134968588	0.171430630131703	NA	0.26680843643147
LOC100576918	48.4143325361836	0.45925207414721	0.287716935966031	1.59619409474537	0.110445465638728	NA	0.220503979213339
LOC100576885	241.948069775396	0.0239298978473973	0.189427809230444	0.126327269182984	0.899472871482347	NA	0.57365692912673
LOC552315	895.54477830731	-0.181484784998722	0.133825288431578	-1.35613221630761	0.175057104134754	0.374248127106401	0.269570883175137
LOC412712	313.087933686281	-0.087596124512523	0.169181560824147	-0.517764016869271	0.60462292691664	NA	0.479836600578666
LOC552274	444.043428080884	-0.022445447722263	0.151812657515054	-0.147849646331613	0.882461427745889	NA	0.568930799288588
LOC550992	767.54332897953	0.537105997055331	0.23553929685477	2.28032436297244	0.0225884578907107	0.145087402605719	0.122167233273619
LOC412451	648.610241239002	0.0141302149531406	0.142142923831283	0.0994085007700596	0.920813933559375	0.963661402355677	0.579337983222672
LOC412384	584.214597420815	0.00342891559441231	0.156855786914283	0.0218603066030718	0.982559387944335	0.990878411889161	0.594261330202587
LOC409462	572.924629354839	-0.0143190392908616	0.141801338130978	-0.100979578046263	0.919566671657732	0.963122682955623	0.579044848095865
CSP6	329.753374066388	0.322492090067394	0.203487850198735	1.58482233584184	0.113006706086165	NA	0.222293836260329
LOC552185	436.053151583665	-0.577328320041401	0.206459147177401	-2.79633200046753	0.00516862748796722	NA	0.0777609783848354
LOC409229	234.273082759716	-0.251544072846312	0.196874863789717	-1.27768506351825	0.201360493849022	NA	0.285450775504912
LOC725736	111.926079042716	0.0174238711646424	0.219437282071076	0.0794025108231097	0.936712471601192	NA	0.582902016585994
LOC725712	1682.9420292177	0.189186219638608	0.130801238577903	1.44636412999967	0.148075097160528	0.342902438331207	0.249460737077353
LOC411836	202.426895812343	0.0563481456281913	0.202701505835535	0.277985826478814	0.781023238947594	NA	0.540808621654491
LOC727199	1023.36085836119	0.377666950649314	0.176622238068739	2.13827519557492	0.0324944144978506	0.169010110267423	0.137430930362748
LOC409036	1060.15221251815	0.0670294669288763	0.143030122390847	0.468638814037439	0.639327828609442	0.786614177336978	0.492774968182533
LOC551381	4214.61340095252	0.661275827714881	0.225854886730668	2.92787921167919	0.00341282600937019	0.0784047118131502	0.0679035176587249
LOC413524	405.656745448883	-0.272826644280614	0.174307204189611	-1.56520578451728	0.117534665636332	NA	0.225778338593588
LOC410057	2553.82452356203	-0.052746568808847	0.145323148967306	-0.362960541274217	0.716634360627621	0.83488768281329	0.51718906615391
LOC724794	178.471218806727	0.0338588474280934	0.21358412269452	0.158526986935823	0.874041557028944	NA	0.566517248162599
LOC552435	826.911133411362	-0.688413158959921	0.25443488469108	-2.70565555425213	0.00681697129454094	0.0977573187455778	0.0862886170265971
LOC724118	222.21308250269	-0.406438407619212	0.206219721852398	-1.97089979546244	0.0487353385399606	NA	0.161023303003033
LOC413551	588.157634046538	-0.0442441442161603	0.156165381371033	-0.283315955352746	0.77693464753676	0.878089417976372	0.539174522484994
LOC410050	104.646883575714	0.155067120103534	0.217938539391702	0.711517662439827	0.476763509716902	NA	0.429935648982032
LOC100578005	461.79414549325	-0.236035227478294	0.188806860300461	-1.25014116066903	0.21124798614884	NA	0.290921342596726
LOC413132	1043.86174837766	-0.477893503062942	0.232546715623199	-2.05504301267915	0.039874850399923	0.18839673605709	0.14864691592653
LOC411546	143.668307467569	0.00549939470812723	0.192730986177832	0.0285340453924361	0.977236214780376	NA	0.592682790657673
LOC100578146	459.205285537753	-0.0663292032932422	0.178800272723522	-0.370968132670617	0.71066126729494	NA	0.51464969943355
LOC412745	378.688950609114	-0.439769961701087	0.237755344682462	-1.84967434607381	0.0643605001504252	NA	0.178901701166833
LOC726259	335.768827682306	0.408711667344148	0.183502989722073	2.22727525019166	0.0259288835868828	NA	0.126585046545791
LOC552260	209.26063965871	0.459167929547051	0.211920785632284	2.1666960519096	0.0302580378436297	NA	0.134329740683757
LOC413855	387.305548085912	-0.376602534823284	0.218716521828895	-1.72187510881279	0.0850921448868346	NA	0.199203057026547
LOC412220	301.63729771177	-0.369818509341473	0.275306702395988	-1.34329642585143	0.179176008974829	NA	0.272252521262313
LOC552197	365.992358090684	-0.15934366922172	0.158608240365583	-1.00463676322518	0.315071788197556	NA	0.352052463429996
LOC552068	1120.29209361773	-0.157232669581664	0.161989126963277	-0.970637181206048	0.33172898392675	0.534952080866975	0.361116877217894
LOC410777	368.599770372458	-0.73523059790044	0.278109405689327	-2.64367397455718	0.00820116075367275	NA	0.0889289274292993
LOC408632	903.302041274143	0.039627328193423	0.134314295514133	0.295034330052033	0.767967654731922	0.873138401897356	0.536343559271679
LOC410776	1151.10515240449	0.23078393366686	0.160895499250876	1.43437159362059	0.151466249498802	0.347603834737736	0.251955424585973
LOC408631	2907.95488413145	-0.138529130806747	0.216686673164023	-0.639306187057873	0.522623764321458	0.701029467001473	0.449679068875231
LOC410775	2927.00438106741	-0.114712336562667	0.137899955712192	-0.831851873847445	0.405492559476277	0.600289360124786	0.396592606053608
LOC102655243	2377.39811555588	0.573238112075593	0.202082655808076	2.83665171453415	0.00455893130365135	0.0842335307253368	0.0748606600940295
LOC724993	2234.58408458136	0.797831042989113	0.165461960678081	4.82183965256735	1.42240268100405e-06	0.000686230271213289	0.000646204538721488
LOC100578606	236.323822093164	0.00903416486621087	0.194788995639941	0.046379236345107	0.963007985697649	NA	0.588730632606458
LOC552090	525.449237347587	0.0731519740314606	0.143724845346751	0.508972362119951	0.610771596768533	0.766022609234248	0.482218466311961
LOC412353	11823.1403110578	0.10246348757579	0.150995077574169	0.678588264080728	0.497398780965548	0.678725803567696	0.43780089229535
LOC412354	3648.29790261312	0.190592310612036	0.189784057051055	1.0042588064221	0.315253883626172	0.51928390087437	0.352111594195529
LOC113219004	273.788357941629	-0.0404211031371281	0.163805859171493	-0.246762254668864	0.805092223670029	NA	0.548111117556915
LOC100576708	140.664045892889	-0.170459750122125	0.216417656567786	-0.787642527996477	0.430905831377699	NA	0.409064282443245
LOC413255	99.8288451058856	0.149050814300944	0.230898788836018	0.645524452736728	0.518587377189404	NA	0.44776078142386
LOC100576747	456.217051828455	-0.342328182591293	0.251420985519185	-1.36157362474888	0.173332483690682	NA	0.268146880057663
LOC725388	509.731096309463	-0.442841384154129	0.175894669532699	-2.51765096310553	0.011814032982866	NA	0.096275365006861
LOC551242	637.731267633419	-0.32616904999704	0.145198356912368	-2.24636873951606	0.0246803989288222	0.150453898019634	0.124687390283123
LOC409311	901.414200816052	-0.39723640922598	0.155985123443961	-2.54663009173878	0.0108768661493301	0.108639341861686	0.0936389022258831
LOC725496	1691.37014765132	-0.19687795839875	0.138405429925892	-1.42247279246317	0.154889044454967	0.351561923273864	0.254858487354161
LOC410756	2795.23175974993	0.0985865547810783	0.165466773601425	0.595808769551238	0.551302984593108	0.723189594895249	0.46106375006075
LOC410755	153.107113698568	0.306302832514306	0.212540178930525	1.44115260491255	0.149541574707595	NA	0.250846055627667
LOC724240	248.797122324705	-0.524139157768716	0.228476078374103	-2.29406580110544	0.021786719391593	NA	0.12009480908628
LOC551530	1669.62585271192	-0.393150058272519	0.178315796337846	-2.20479658194519	0.0274683720154204	0.157345212784901	0.129093275168929
LOC408607	6634.65934791752	0.221058353626455	0.172269079904671	1.28321550070844	0.199416586839607	0.400880973364864	0.284440344697041
LOC100576425	194.730097485583	-0.265076792032917	0.189300783611329	-1.4002942141918	0.161425232720729	NA	0.260596781959771
LOC551623	839.866644064556	-0.151109833092426	0.261119951703565	-0.57869891636612	0.562792347300896	0.73206841581201	0.465236215516248
Prpf3	572.052496405886	-0.349308671660538	0.207981118946264	-1.67952107109679	0.0930505358024158	0.272472488949743	0.205819138044487
LOC724541	62.6309754475834	0.233253953048043	0.266170699448031	0.876332194083539	0.380849468110442	NA	0.387289955941199
Hsc70-5	6067.7584561242	-0.0851838184487979	0.136867028776047	-0.622383777967318	0.533689544649285	0.709082008221296	0.453238573384072
LOC551732	590.955659301512	-0.134651181931861	0.160182423118091	-0.840611468541665	0.400565631732623	0.59825457666333	0.395534732089283
LOC100577959	568.909709371358	0.0136166332301252	0.193410838738744	0.0704026378196844	0.943873191783788	0.97240297598158	0.584063319934682
LOC113219074	30.3840959954116	-0.321594875584996	0.38370610625701	-0.838128115088138	0.401958754180911	NA	0.395832616232803
LOC100577920	1160.3666537121	0.305375872309084	0.181302669357924	1.68434294646935	0.0921154100723921	0.271721096103652	0.205060140909003
LOC100577882	53.0201643429096	0.622692508829805	0.327351094913765	1.90221605641442	0.0571429145593545	NA	0.172233126935291
LOC100577847	95.2612299297252	0.437865994196738	0.288184340254364	1.51939551541995	0.128662970115838	NA	0.235716515173816
LOC410694	122.185563602851	0.455857574288971	0.211377155209659	2.15660757586041	0.031036253754619	NA	0.135238182133158
LOC113219412	1057.67757918289	0.132149980977342	0.152369530739886	0.867299258162964	0.385778063051819	0.586296237231711	0.389324411897855
LOC724994	595.582484876994	0.307193458104017	0.17555157008291	1.74987587954317	0.0801397336142647	0.254920676449185	0.19365891175765
LOC725045	216.844711282606	0.145459235875513	0.178195543050184	0.816289977772053	0.414334305144181	NA	0.400285197418147
LOC725081	3624.25901532527	-0.286140199552046	0.151592570321897	-1.88756084117082	0.0590849312704599	0.225767224304779	0.173712120065207
vas	221.016835488554	0.172815287716652	0.204119377690829	0.84663832347367	0.397196746045743	NA	0.394081711642132
LOC412263	5271.63992438837	0.181660973540972	0.142165481797955	1.27781351171551	0.20131518906132	0.403187523479821	0.285450775504912
LOC725305	1822.87222450264	-0.257273868953293	0.175121899924213	-1.46911305247735	0.141802128047683	0.335286872917835	0.244715687330567
LOC102654257	4084.24483026691	-0.0400176939858293	0.166143279071952	-0.240862550741512	0.809661647897182	0.899710907778155	0.549330075122454
LOC552181	79.797706154519	-0.205247069085126	0.25100135203021	-0.817713002041609	0.413521084428916	NA	0.39978293437656
LOC409922	543.245362006543	0.214639865258785	0.19921635408	1.07742090879041	0.281292267259587	0.48725909085307	0.332827246788573
LOC409923	1282.90694260754	-0.292899359642562	0.17067792366073	-1.71609399364842	0.0861448403947519	0.264901485123239	0.200526174090069
LOC100577118	238.910489971371	-0.345831711844692	0.203485349882717	-1.69954108265789	0.0892172807003181	NA	0.203292433792115
LOC727144	272.937371753001	-0.23099875874706	0.194498980173278	-1.1876605139074	0.234967186300413	NA	0.306743532158447
ecd	531.741346382168	-0.262083560184619	0.175305997197555	-1.49500624265166	0.134912812930203	0.327903820613259	0.239662417166712
LOC727127	568.778399302966	-0.764888177277765	0.197132220928022	-3.88007690309057	0.000104423443239654	0.0133354879572523	0.0126506891232344
LOC409105	1084.91098473101	-0.0652151396420462	0.168519948906924	-0.386987653776619	0.698765348102283	0.822455717392277	0.511470252641929
LOC727116	1038.25158139535	0.0494138791181801	0.138040971517837	0.357965309681951	0.720369274498397	0.837568100676242	0.518854232101107
LOC726554	196.98421504477	-0.016345285146478	0.186650629891875	-0.0875715509556365	0.930217214335425	NA	0.581682876272266
LOC552434	281.284925779496	-0.271154556127244	0.166737388715891	-1.62623727176916	0.103899190163528	NA	0.216357128156108
LOC100578519	671.572083592546	-0.419587909142485	0.201419073896484	-2.08315876458714	0.0372367543730371	0.181054857209101	0.144897993854191
LOC724669	261.217905715677	0.173187548400068	0.202750646117963	0.854189871726993	0.392999794119929	NA	0.392561034802951
LOC551905	37.3837591064751	1.33211741101703	0.492955448068641	2.70230791897352	0.006885995860325	NA	0.086299084431603
LOC100578694	640.937036499828	-0.272461140599348	0.148853590165062	-1.83039683690006	0.0671906203587051	0.236036952748784	0.180453889276453
LOC727049	714.211359837655	0.582591485557757	0.203624350016745	2.86110912329418	0.00422161717139106	0.0811463659586335	0.072318774014541
LOC726108	331.423297942383	0.147491490811024	0.158690009443654	0.929431482978102	0.352665518299352	NA	0.371988841250469
LOC413578	1261.95702372286	-0.404966235811725	0.167286559767478	-2.42079361530665	0.0154866669748751	0.122694993147986	0.105799534263548
LOC412003	192.79677074213	-0.440293627674015	0.317201351140622	-1.38805722639821	0.165119620004076	NA	0.262671687361311
LOC727393	678.593933279669	-0.105040699716374	0.146072443117817	-0.719100040187949	0.472079282570295	0.658787853257247	0.427661048900868
LOC727456	243.85954476792	0.0740924147074693	0.195185391185839	0.379600206026305	0.704242207856388	NA	0.513068076143634
LOC727460	769.27786153742	-0.283796530978875	0.162619697784493	-1.74515470662705	0.0809579429797553	0.256106229425678	0.194448674259462
LOC409530	471.812973517002	-0.654456548625842	0.207816410019207	-3.14920534218331	0.00163715114665385	NA	0.0540060042104891
LOC102654355	41.8229863247796	-0.533846650981828	0.333226772313729	-1.60205210186179	0.109144088559724	NA	0.219644281793911
LOC552418	2108.27270609136	-0.238882703165568	0.169431331506631	-1.40990866943768	0.15856665245842	0.356733888587804	0.25812222385452
LOC726053	786.652820215655	-0.462779160542139	0.226088699585037	-2.04689204454501	0.040668685383645	0.189165654307619	0.149282611027361
LOC102654146	1401.7904554775	1.21729417901325	0.242353452255881	5.02280519498442	5.09221878301664e-07	0.000276380174448228	0.000277610406703567
LOC552453	35.0902929297793	0.236529969136709	0.324150715738009	0.729691336939331	0.465578877640147	NA	0.42479954929183
LOC724319	318.263029873503	0.0115800197251154	0.179239956387462	0.0646062404751035	0.94848751591243	NA	0.584935583780208
LOC100577437	29.3825476853785	0.0824140951347438	0.377178801488905	0.21850139724029	0.82703846977894	NA	0.554852543413965
LOC100577995	2906.9859923509	-0.508767540534427	0.208153554025594	-2.44419338846297	0.0145176422669252	0.120158585011449	0.103785027435705
LOC552364	598.045074022961	-0.131421083798472	0.170045525667783	-0.772858228891174	0.439606287954102	0.631415978265535	0.413275323868312
LOC550695	1874.87376946457	-0.490337510304692	0.192616474551165	-2.54566755749879	0.0109069004949258	0.108639341861686	0.0936389022258831
LOC724665	1512.02669644596	-0.146217673606878	0.134195213184111	-1.08958933882591	0.275894081428497	0.482039623252243	0.330103858512621
LOC409950	587.157874745498	0.349572937577204	0.1819113881799	1.92166604342272	0.0546477925817575	0.21801618138648	0.168892656748112
LOC726051	163.21497943212	-0.608953665187317	0.715752740987353	-0.850787751573665	0.394887266823522	NA	0.393523857942784
LOC412386	1110.95857946331	-0.191047388286675	0.136969420196534	-1.394817821471	0.163070783335664	0.361858220759933	0.261632897612969
LOC412516	90.7787351285472	-0.314217157269285	0.250497811776989	-1.25437086671649	0.209707236616596	NA	0.289797809052698
LOC100576733	198.085318556278	-0.0727148209306369	0.185333757398679	-0.392345258366597	0.694803127485939	NA	0.509527813525865
LOC726804	8263.54700770845	-0.215089723719572	0.128951439852953	-1.6679900896403	0.0953176941291096	0.275545557861913	0.207440946466058
LOC102653978	39.38808411607	0.104340644305338	0.363458711820875	0.287077021163166	0.774053346431209	NA	0.538208121896791
LOC552370	1376.75312080398	-0.506930912393777	0.21205934329438	-2.39051439336987	0.0168247896539744	0.127365608807711	0.109382956255365
LOC552343	872.848092134076	-0.0301904609773757	0.154643616901056	-0.195226040248995	0.845215994087668	0.920242689651117	0.559900979501621
LOC100576623	95.2275203249852	-0.535964235879938	0.349900778298971	-1.5317606279286	0.125581515149513	NA	0.232629155620708
LOC100576732	41.4665834209585	-0.321910465090945	0.307223618204566	-1.04780507101703	0.294728425662015	NA	0.340559324368704
LOC412853	92.2462229762496	0.223405912232376	0.23206744055395	0.962676675793472	0.335709805237068	NA	0.36328282316088
LOC727515	40.7487227889568	-0.0761921462298983	0.309737522527427	-0.245989396467622	0.805690440746668	NA	0.548326914051197
LOC727168	955.765358291803	-0.153492682741312	0.145722505301088	-1.05332173931658	0.292193558703445	0.497531149760925	0.338995459022722
LOC727350	414.959233454931	-0.0429017174196599	0.179862182799497	-0.238525501869868	0.811473538418685	NA	0.549413446186518
LOC727358	223.599175508023	-0.126585188592866	0.174687919075381	-0.72463619271944	0.468675249187532	NA	0.426055972823415
LOC726925	168.409193713156	-0.0950892823067157	0.209703227518715	-0.45344691844683	0.650226957999938	NA	0.495292872653837
LOC411359	1292.09974663488	-0.279065743452311	0.151975568192336	-1.83625398984614	0.066320101079873	0.235247154811256	0.18012448988148
LOC552129	625.829060001717	-0.722816546860696	0.26785564421156	-2.69853020640399	0.00696464170515488	0.0982481165591937	0.0867471539818856
LOC727574	2298.80742273022	-0.433590000113599	0.22528940359552	-1.92459118446626	0.0542805231390386	0.217222148820005	0.168167804371079
LOC100578586	1018.86151132203	0.26137954986979	0.224933010573527	1.16203286126537	0.24522211699118	0.449193714405196	0.312056864503299
LOC113218599	96.4608169551212	0.461375811313112	0.235616454334005	1.95816464778422	0.050210695916454	NA	0.162935473431644
LOC107965774	205.473874808099	-0.0757858013278422	0.310852036225035	-0.243800240938356	0.807385533718427	NA	0.549032139307372
LOC409793	1601.33564263672	0.315023227755513	0.168219011754431	1.87269693520367	0.0611102468293082	0.228939337129298	0.175343279401527
LOC409489	520.199181455274	0.230433682470675	0.145057796297146	1.58856461598686	0.112158722051354	0.299503795293344	0.221942327902261
LOC726110	344.839655000989	-0.213702659696941	0.168789402084106	-1.26609050721357	0.20548068081282	NA	0.287676069714256
LOC100576649	212.1485397093	-0.172076146609829	0.190534754257684	-0.903122095914898	0.366461098154054	NA	0.379597371527883
LOC409111	1171.38962728708	-0.370854007203641	0.212781715772991	-1.74288474860918	0.0813537486252181	0.256341056988895	0.194693986330215
LOC100576896	1194.24735740563	-0.504668480152552	0.197939365199326	-2.54961149160173	0.0107843022583734	0.108524262968754	0.0934348539706978
LOC100576862	328.42756474588	-0.337381396966475	0.204374923163241	-1.65079644676856	0.0987801459348105	NA	0.210851870657089
Tert	50.8744887097577	-0.177530912950668	0.296163615128382	-0.599435257682519	0.548882671322267	NA	0.460186216896337
LOC100576829	566.396824749538	-0.521125941901095	0.226541705518121	-2.30035322065416	0.0214282167806652	0.142265011103438	0.119960428437025
LOC725528	1889.31548899796	-0.352503386481002	0.145997630934216	-2.41444593467297	0.0157591615929451	0.123513140138209	0.106617929616471
LOC412594	722.723141045761	-0.353151638341001	0.20994849604875	-1.68208701175454	0.0925519685680033	0.272078975979872	0.205524145857967
LOC725850	63.5227564424653	0.158177262384166	0.260556243393974	0.607075310588485	0.543800934184254	NA	0.457855952180363
LOC727119	75.4267576938632	-0.448796733389151	0.267467776667894	-1.6779469249726	0.093357460728693	NA	0.20621216946469
LOC412646	314.077057973731	-0.446470327447846	0.248737068914927	-1.79494889682304	0.0726618423665619	NA	0.186764540945589
LOC726171	4242.8462340049	0.137633452441173	0.259903591713815	0.529555792336738	0.596419951953768	0.755221764766188	0.476976997931661
LOC412465	1365.04958318017	-0.391707530178143	0.194229097891999	-2.01672939034064	0.0437237610824716	0.195518610319353	0.15368603371868
LOC100217360	4382.44590423981	-0.118966288969004	0.169640041588946	-0.701286605772417	0.483124170956466	0.666791211154792	0.432105950902353
LOC552292	32.1652928189792	-0.40983688078931	0.467274882306746	-0.877078773774683	0.380443852980773	NA	0.387215011238263
LOC102655008	98.0880734640706	-0.164798434576053	0.2426202418715	-0.679244375097674	0.496983034772601	NA	0.437734443505431
LOC409457	659.085041330217	-0.420315058757576	0.274222809695874	-1.53275017210904	0.125337422025029	0.316404120018998	0.232334883542284
LOC726760	212.578612654312	-0.0220712179442713	0.179288567369426	-0.123104435871772	0.902024398683596	NA	0.574432835710139
LOC412505	1649.26468604568	-0.352855360370747	0.144509449729726	-2.44174592755483	0.0146164292567815	0.120245072025161	0.103785027435705
LOC412697	173.651857597825	-0.097973650237268	0.187866825696164	-0.52150585860071	0.602014425415364	NA	0.47912078793074
LOC724300	1131.83258268653	0.277848990039098	0.165097599263723	1.68293779726783	0.0923871336027231	0.271778410638905	0.205241709066514
LOC100576121	40.2116947941086	0.488954044618306	0.324670528991428	1.5060007021186	0.132066993427094	NA	0.237341712586788
LOC113218584	96.6272812885437	-0.238040208178222	0.254743421461495	-0.934431228145385	0.350081495448119	NA	0.370803372224515
LOC412955	90.5527627794298	0.113136848445496	0.242949338605663	0.465680825042833	0.641443979577852	NA	0.492814425830304
LOC102655291	65.1882111990842	0.0365752323256336	0.251284952912724	0.145552815246908	0.884274419149748	NA	0.569437156517267
LOC726798	471.826579678773	-0.158622085767533	0.249652001245184	-0.635372778813617	0.525185317395471	NA	0.450592308106499
LOC726812	156.139369050284	-0.260111810203249	0.202850348201028	-1.28228426773749	0.199742944703485	NA	0.28448465140887
LOC726735	1331.08898931041	-0.476674340717418	0.191869966147896	-2.48436141563703	0.0129784013302361	0.11423838725948	0.098685520673636
LOC107964089	590.413237942767	0.218033257327396	0.234349418725205	0.930376778886142	0.352176037221751	0.554701590697525	0.371833755136158
LOC725270	20.912695415035	1.87383712510112	0.669293230307614	2.79972520301735	0.00511461261927604	NA	0.0776688697234448
LOC724471	7557.00166222222	-0.328873376073781	0.197498484487947	-1.66519442884055	0.0958739721054018	0.27660118729678	0.208153010261851
LOC411729	682.686660346236	-0.0887107266925126	0.166732199034578	-0.532055159148444	0.594687792865372	0.753907853028159	0.476559619961175
CPR17	25.1594244999421	0.423922158720799	0.410766215090615	1.03202781325938	0.30205908827484	NA	0.344757459551437
CPR22	4067.47273884491	0.528054637598904	0.268699745987293	1.96522194562802	0.0493885550272241	0.206283411355537	0.161584951805462
CPR14	18939.3304191056	0.554019750354541	0.206696986373209	2.68034749841108	0.00735457674025843	0.099687897969837	0.0875333710443229
LOC100578507	160.849873788479	-0.0519601207776896	0.199185419120501	-0.260863074250708	0.794198101600335	NA	0.544684523465321
LOC551255	530.453584414346	0.132210638805556	0.148588829481006	0.889775087853803	0.373586665818561	0.575942849791921	0.38362825436879
LOC102655706	852.509511111674	0.329612476813713	0.178729509539111	1.84419728820206	0.0651543934397239	0.23438307896875	0.179253729230621
nAChRa6	532.285077586851	0.185895563637087	0.184124598217344	1.00961829889591	0.312678199130163	0.517268050012549	0.350573884801622
LOC550962	34.0902670372657	-0.346723230915423	0.331788588168932	-1.04501252688922	0.296017179900331	NA	0.341469475474524
LOC727534	327.347780439472	-0.103707190159574	0.170896442829037	-0.606842298428183	0.543955574177788	NA	0.457915431576564
LOC552788	1071.95156933483	-0.274819078511451	0.156089736541528	-1.76064797468817	0.0782980033337412	0.252203212518623	0.192190013216138
LOC552790	442.306908607448	-0.221745493074252	0.151369840027605	-1.46492519932513	0.142941326792499	NA	0.245980864721279
LOC724275	150.137510712349	-0.133999027677062	0.655614506775635	-0.20438691684246	0.838051153244968	NA	0.557534153218637
LOC413607	376.065303391445	-0.405010218313656	0.207806537152545	-1.94897727407078	0.0512981387567624	NA	0.164305475716923
LOC102654955	3018.61327811495	-0.00430591349408592	0.159052115937318	-0.0270723433555758	0.978402033478048	0.989108644787354	0.592986582697821
LOC100578624	159.234402069593	0.255114942258705	0.211805021472016	1.20448014162125	0.228404052981603	NA	0.301487001433977
LOC412759	49.7669170822437	-0.198761365573738	0.302044917216481	-0.658052343358195	0.510504497254713	NA	0.444626460894575
LOC551997	692.096092230479	-0.100913970318785	0.160290690538712	-0.629568504444198	0.528976935449821	0.705398745423748	0.451705560663194
LOC412010	106.493134898708	-0.080089523126792	0.214930577623644	-0.372629730084443	0.709424042549645	NA	0.51439443108977
LOC412009	360.27407866567	-0.159401341711208	0.162909584788131	-0.978465091041231	0.327844348680054	NA	0.359309509154842
LOC412008	412.524132921377	-0.300910026550827	0.238811259876194	-1.26003282553271	0.207657520928445	NA	0.288795409594025
LOC552105	402.219720028268	0.217511896988079	0.157680312374794	1.37944866871565	0.167756462428333	NA	0.264321109388015
LOC724716	124.638867039684	0.532174686297275	0.233749049329128	2.27669240933661	0.0228046001270338	NA	0.122848720277649
LOC107964039	511.711755045523	0.350660592393869	0.184372016931443	1.90191873056451	0.0571817800663421	NA	0.172233126935291
LOC724736	281.089557717202	0.565041098160508	0.184244354187665	3.0668027829226	0.00216361556801861	NA	0.0589764720823713
LOC102654330	27.8819754644268	0.669977981664805	0.399739393569749	1.67603691915819	0.0937309613002072	NA	0.206460300805248
LOC413279	74.5249725292966	-0.579672122348843	0.258541866524571	-2.24208222111583	0.024956058827627	NA	0.124865138607229
LOC413278	510.712095715622	-0.255775787164451	0.182475595785837	-1.40169860009468	0.161005268857987	NA	0.260239087864294
LOC551690	938.615089054457	0.239799090745582	0.151167387718739	1.58631497417784	0.112667877160334	0.300046910442273	0.222293836260329
LOC413146	444.06618254213	-0.503466403066053	0.206199993144331	-2.44164122116943	0.0146206687129446	NA	0.103785027435705
LOC409791	9445.05310744816	0.210610076015425	0.205518872621385	1.02477243733922	0.30547057458755	0.509352240729318	0.345789332620195
LOC551596	2222.83691775083	-0.227966863138597	0.129276323098208	-1.76340769659279	0.0778317526381139	0.251634750524714	0.19182286596899
LOC413147	816.60915176886	0.0189114485679549	0.14248663503402	0.132724367892046	0.894411370567097	0.948780812360574	0.572842864056599
LOC113218583	206.301709938434	-0.482426536268915	0.203899976119584	-2.36599604104897	0.0179816366975568	NA	0.111365651926272
LOC551536	795.285344251466	0.157453184327599	0.143145750103107	1.09995011527891	0.27135385747928	0.477204718175389	0.327865406900504
LOC412143	1160.25829454497	-0.362454976066799	0.203946026743905	-1.77721028378715	0.0755336480782661	0.248836949890616	0.189905753614438
LOC100578537	326.841808256513	-0.500709691387442	0.213781133666861	-2.34216033379123	0.0191724766016202	NA	0.113930901209639
LOC413869	356.722097636569	0.088574530021202	0.188478890952142	0.469944032319738	0.638395004236577	NA	0.492301549532878
LOC102655388	117.477473020685	-0.156568523638374	0.209175985019855	-0.748501428706133	0.454157763630229	NA	0.419795999179142
LOC100578498	265.653438345161	-0.203708444246898	0.177950987211938	-1.14474467064509	0.252314941094016	NA	0.31575551466594
LOC412711	375.632590846427	-0.287048981033237	0.207738357408625	-1.3817813167195	0.167038857371694	NA	0.264183028828866
LOC551273	511.176651599479	-0.158187091878563	0.186326563693535	-0.848977669865393	0.395893717827597	NA	0.393787428846122
LOC100578429	159.491145068346	-0.570158762527964	0.264441871721967	-2.15608352344226	0.0310771438283826	NA	0.135238182133158
LOC100579024	164.732857416279	-0.0489109366123902	0.202709595237026	-0.241285749474262	0.809333654934311	NA	0.549330075122454
LOC725295	291.546829825203	-0.473003037214777	0.21274452944729	-2.22333819085096	0.0261930041197781	NA	0.126816454930052
LOC100578885	779.957718414564	-0.592900756637055	0.259497434452693	-2.28480392450717	0.0223243274482925	0.144244389554295	0.121340600219386
LOC408716	4085.69918991519	-0.370405542581349	0.197577888334172	-1.87473176125289	0.0608296351004883	0.228522089617817	0.174985477320911
LOC113218529	91.9739065088668	-0.0846688326561821	0.229938590032672	-0.368223675043635	0.712706458491871	NA	0.515556095971055
18-w	1133.43839003219	0.314057689778198	0.177363602404395	1.7706997688406	0.076610640945456	0.249992840156036	0.190623046508132
LOC408717	2584.43830130899	-0.247807651074105	0.146440741260096	-1.69220429329819	0.0906070282309086	0.269735545197179	0.203850834075362
LOC408718	2641.16066794794	0.0763982214341915	0.163724660733143	0.466626231455223	0.640767316172744	0.787358866065012	0.492814425830304
LOC100578839	412.699708659004	0.24752752428476	0.24883835596227	0.994732196037704	0.31986653114378	NA	0.354484315041159
Calpb	3361.51023962314	0.0105611271198928	0.13375187368218	0.0789605919464579	0.937063968225833	0.969855033968441	0.582902016585994
LOC725743	363.024320118998	0.046488191992001	0.154209820787604	0.301460644688966	0.763063255913619	NA	0.534729338641617
LOC411452	895.025401116494	0.381937924562696	0.227417043045847	1.67946042850314	0.0930623447978969	0.272472488949743	0.205819138044487
LOC100576174	43.0041947542872	-0.141168536800094	0.332044061174059	-0.425150012624658	0.670727321462643	NA	0.501381691990568
LOC410087	2924.33100119873	0.876904614159532	0.173500590419546	5.05418806955681	4.32225538172865e-07	0.000268103326678083	0.00026181625240984
LOC724274	7086.84404374157	0.304340024190208	0.202332544151097	1.50415755145616	0.132540804631927	0.324586674400355	0.237608444116569
LOC724367	1278.30541722595	0.196861499518005	0.220364583454881	0.893344549435332	0.371672687719882	0.575109244820473	0.382919006688293
LOC724405	5005.12424311691	0.200635279733602	0.167556678291879	1.19741738603878	0.231143910406704	0.435035482872088	0.303423499548287
LOC724449	8880.12633267415	-0.154129243731448	0.176531904375088	-0.873095683621929	0.382610926398639	0.583916663927195	0.388048171891765
LOC724488	7238.57838349181	-0.0443592328703518	0.170852951817535	-0.259633985824992	0.795146118184816	0.890875948934317	0.544990699801633
LOC411348	2661.94701563848	-0.390362076731628	0.195096118508173	-2.00087054379442	0.0454063426927677	0.199518312843957	0.156078120794297
LOC408715	2244.45326127417	-0.232743096277165	0.170314128463841	-1.36655190251335	0.171765801818983	0.370679478875757	0.267239894378207
LOC551009	575.014961736651	-0.311817179189677	0.16331489551535	-1.90930030114963	0.0562233634936812	0.220828007543697	0.171123693099668
LOC412824	1388.95822879734	-0.0576661217604957	0.135709728820541	-0.424922533275059	0.670893147652739	0.804310841677195	0.501436894370584
LOC100578420	740.197282978435	0.585507082329016	0.204742358393075	2.85972617940118	0.00424006938627876	0.0811463659586335	0.072318774014541
LOC408714	444.954686642401	0.531708526177035	0.172096460351205	3.08959594573854	0.00200428958183665	NA	0.0573480296176147
LOC100578727	466.409298021197	0.473530060660051	0.224127906954894	2.11276706722358	0.0346207097231422	NA	0.140852639426077
LOC100576249	365.058882606414	0.346586456972999	0.153472123999376	2.25830234143634	0.0239268164200589	NA	0.123367169118826
LOC410897	444.820018279519	-0.117072120041361	0.15850601670868	-0.738597325655649	0.46015154865107	NA	0.421984983838347
LOC408713	64.5509671800972	0.152464167139	0.2675150595342	0.569927417934797	0.568726927796984	NA	0.467496795336396
LOC410896	549.156750212907	0.204571894471403	0.147846071037233	1.38368164291552	0.166455956905715	0.364657802666305	0.263566983957576
LOC408712	718.465183044368	-0.388152985584667	0.208806492197579	-1.85891243849537	0.0630395507217293	0.232365946526103	0.177813262510898
LOC552020	7776.17506736999	-0.141660814777908	0.155024624455093	-0.913795568128878	0.360824275632347	0.563358146276753	0.376909548146016
LOC113218591	71.8609173982893	0.201849022330688	0.318028818898463	0.634687834359854	0.525632029638688	NA	0.450592308106499
LOC408711	488.694601766335	0.0406619668093539	0.149263555425378	0.272417246751718	0.785301213001145	NA	0.542070364541247
LOC410895	2101.27904757437	0.133439718562982	0.124280350335504	1.07369924692642	0.282957499010493	0.488331739976315	0.333123980726803
LOC107964042	62.1269977124336	0.351132253139055	0.281649946715002	1.24669738884901	0.212508476623206	NA	0.291756806613685
LOC410893	1456.04869559263	0.331673432611492	0.158111389613038	2.09772005307923	0.0359298823776068	0.177080078641962	0.142663852027623
LOC408710	1310.27702152898	0.100396827296604	0.140727395424346	0.713413525446624	0.475589906006075	0.661862619191788	0.42961955601033
LOC726303	42.4592248837231	0.0558034629886115	0.335801001866133	0.16618015633812	0.868015175255289	NA	0.565443838539119
LOC551849	61.7380412543901	-0.116169205998111	0.264158474982878	-0.439770883768316	0.660103057643655	NA	0.498083988314076
LOC107964103	63.7760184144772	0.184398587243183	0.26215525035611	0.703394599164796	0.481809871371495	NA	0.431803904499007
LOC408705	2480.649948384	-0.233313064867858	0.175757458942617	-1.32747176860376	0.184352672724751	0.385763520467888	0.27679094429292
LOC551773	503.877635720535	-0.340046529395124	0.185802592492238	-1.83014954115525	0.0672275806322515	NA	0.180453889276453
LOC551743	224.079348949128	-0.36033390513102	0.195340816892566	-1.84464215345837	0.0650896107745137	NA	0.179253729230621
LOC724162	242.056218142658	-0.236334908345733	0.184202479616568	-1.28301697587178	0.199486128723845	NA	0.284440344697041
LOC413265	690.076123454511	0.0772136570998036	0.141426003982158	0.545965062475673	0.585089953241521	0.747327459022538	0.473391354295337
LOC552307	48.7710143283805	-0.259504046874772	0.337663848247085	-0.768527777616512	0.442173694426151	NA	0.414331424522109
LOC552346	1008.49332687753	-0.266762822941902	0.165086069131986	-1.61590147699638	0.106115616246759	0.291058360100602	0.217944570090994
LOC724424	122.403092734785	-0.132435559384432	0.235982096698603	-0.561210198727827	0.57465425119114	NA	0.469617606895278
LOC411955	416.579575078336	-0.278994734577181	0.167893831325357	-1.66173308676555	0.0965663039386749	NA	0.208576293930179
LOC100579003	449.893334020673	-0.231283826851476	0.155222482129566	-1.4900150009096	0.136220291685468	NA	0.240373302481172
LOC552405	400.581246486631	0.0744254572327873	0.159461364317944	0.466730342808264	0.640692817942959	NA	0.492814425830304
LOC552422	270.627546344713	-0.237939455628339	0.16530357085442	-1.43940904844632	0.150034662189262	NA	0.251132276827554
LOC724598	209.501391654757	-0.140195051167751	0.189810334329209	-0.738605996681901	0.460146281816178	NA	0.421984983838347
LOC410127	3261.02987649453	-0.163549720824883	0.150301456225899	-1.08814461903198	0.276531268750937	0.482387171092355	0.330113618101091
LOC413928	407.197788622566	0.626360338353748	0.224892688548926	2.78515207584208	0.00535026235424829	NA	0.0784080813001664
LOC552471	82.991170719086	0.459892211617857	0.288843652130251	1.59218389681097	0.111343390402119	NA	0.221212173176838
LOC552483	163.764323309602	-0.158879673556811	0.19899475209809	-0.79841137457984	0.424631804639352	NA	0.405928355144264
LOC411349	692.749818842307	-0.215723107069952	0.152242110823922	-1.41697396273919	0.156490540122155	0.353757527221724	0.25627307631679
LOC102654426	3925.61479795287	0.250030725178836	0.282749564521905	0.884283325428306	0.376543287230179	0.578636466839183	0.385354913419458
LOC409038	203.703246756679	-0.27478926802538	0.212487057987306	-1.2932047279877	0.195940260870226	NA	0.28281691782871
LOC409039	2146.91979369066	0.157826662079906	0.20949655775881	0.753361600631209	0.451232651072873	0.641116548088487	0.418432823772462
Hiscl1	892.865117878372	-0.111610656557818	0.147576610915215	-0.756289603519493	0.449475580049593	0.639457067029926	0.417798400476208
LOC725008	88.1745667238458	-0.459908358939659	0.244463425583571	-1.88129720362786	0.0599315012097395	NA	0.174315503870858
LOC725119	273.310306769927	-0.254179983189181	0.174462557029247	-1.45693143283788	0.145135308323707	NA	0.246916780455086
LOC725164	4539.5237575658	0.197757396475316	0.174476697871978	1.13343156356856	0.257033065440895	0.460601555981992	0.318619811691822
LOC413060	245.903378496979	0.557754004109672	0.201552594501097	2.76728764266359	0.00565248576776571	NA	0.0796751735345389
LOC410891	315.242836122283	-0.165601494985488	0.179396757843245	-0.92310193883319	0.355954084350128	NA	0.373922029221897
LOC410890	47.3706745133051	-0.101438248984463	0.360915481867105	-0.281058181432667	0.778665775188244	NA	0.539830765274752
LOC725396	740.51306006523	0.22387969754459	0.162335799476338	1.37911476252792	0.167859372931014	0.365886243607663	0.264330465469951
LOC408708	672.217800906988	0.0719869545903659	0.143574196064506	0.501392008895689	0.616095262652302	0.767905193014101	0.482908718526514
LOC725429	222.387098241972	0.157016437687375	0.176028254910071	0.89199565017327	0.372395263901289	NA	0.383123611024379
LOC410889	164.838681609919	-0.0444647901719455	0.201502332346666	-0.220666379659805	0.825352211293699	NA	0.554067941046138
LOC725530	918.531617337611	-0.0305882247028903	0.174067907956939	-0.175725813344395	0.860509354745935	0.928511833575261	0.56393364185732
LOC725588	1639.37742646029	0.42239902412026	0.163297730029268	2.58668031726193	0.00969054520742333	0.106491538304407	0.0917123945390962
LOC725625	675.643264964781	0.553147808252502	0.176186056115694	3.13956632237271	0.00169198109917888	0.063407597525975	0.0540060042104891
LOC100576512	669.869193962319	0.45540517378658	0.161789510464434	2.81480036919138	0.00488075425056741	0.0855403366609028	0.0769813292682728
LOC725757	264.641699744309	-0.280380171319522	0.20760868097242	-1.35052238666633	0.176848477730111	NA	0.270895646554536
LOC725789	355.985265076594	0.120020327269679	0.17132842253009	0.700527825431883	0.483597734215169	NA	0.432105950902353
LOC725742	88.2949420495367	0.6110937104163	0.264993945517984	2.30606668851168	0.0211069062939703	NA	0.118994474615008
LOC408706	5334.13678366989	-0.584669725121462	0.184136124566612	-3.17520381455598	0.00149731291793926	0.0612160557735173	0.0527185421631628
LOC725826	342.942529680003	-0.374292023512392	0.169810731067534	-2.20417179267391	0.0275122647089152	NA	0.129188188799459
LOC725860	482.856942488809	-0.281246744355424	0.169679775942819	-1.6575148263409	0.0974154338656034	NA	0.209332176878242
LOC725891	313.294321971448	-0.37299242275405	0.303107192586058	-1.23056275758996	0.218486441475282	NA	0.29483009614639
LOC412076	462.270358966933	-0.15332395846315	0.167060137037579	-0.917777042339312	0.358735603715082	NA	0.37583733332174
LOC412077	1127.45684604995	-0.126970191620815	0.174747854864422	-0.726590845531835	0.467476637846964	0.656205744118489	0.425676173149537
LOC726009	245.442445449923	0.320317834943715	0.220379680224895	1.45348171218342	0.146090053672289	NA	0.247339492193372
LOC551412	129.386238606708	-0.342214535191466	0.199091246194896	-1.7188828827585	0.0856356995746273	NA	0.199938602806617
LOC726085	655.928682221632	0.0867013009512961	0.154109953087062	0.562593779405772	0.573711528864324	0.740394684781591	0.469409896204568
LOC551508	181.392785751133	-0.0804769958654425	0.194687336535015	-0.413365333861703	0.679338969049637	NA	0.504334281006542
LOC409566	334.734082042884	-0.270118984779126	0.197059216529474	-1.37075032336142	0.170452801523664	NA	0.266108407773146
LOC412678	324.678241886877	-0.00635144693310845	0.170140803989119	-0.0373305332065708	0.970221460475337	NA	0.59072628215016
LOC413955	1423.55923015355	0.0179328557945013	0.134923595752289	0.132911190918932	0.894263616356629	0.948780812360574	0.572842864056599
LOC412127	126.995062103469	0.432302636534405	0.229822326713585	1.88102976206119	0.0599678703903848	NA	0.174315503870858
LOC410887	1659.25061817537	-0.118111744782296	0.186158700266188	-0.634468035141028	0.525775421125038	0.703830879275204	0.450592308106499
LOC726187	3909.21026118646	-0.106397567053987	0.131455107131188	-0.809383289671704	0.418294710998424	0.61007063295657	0.402328890524375
LOC726295	3154.88894436687	0.194310702507003	0.188860241271045	1.02885975999647	0.303545579946967	0.509055924910467	0.345440893738572
LOC410886	1216.81011176231	-0.414820211980099	0.193365412074493	-2.14526583389325	0.0319315985662827	0.168640267337863	0.136667055127453
LOC551254	807.035547703757	-0.487385846140405	0.295185260905373	-1.65111850315807	0.0987143798014223	0.281060876785427	0.210851870657089
LOC410885	60.9896060941562	-0.234095758227565	0.276112434240099	-0.847827657134781	0.396533958005284	NA	0.393979942638461
LOC410884	60.6730740578725	0.136825226104087	0.342026895711602	0.400042300239037	0.689125361213009	NA	0.508097987530665
LOC551123	10093.8691897416	-0.0946727972545733	0.207058171880604	-0.457228016623099	0.647507162861404	0.790093802706654	0.494257671750889
LOC100577125	54.8214451771455	0.0610125133681219	0.306528096815131	0.199043787509368	0.84222849233845	NA	0.559019919228422
LOC410883	321.677501138225	-0.0418547823041774	0.168068737412837	-0.249033716492836	0.803334700831513	NA	0.547506800976822
LOC100577268	682.442827159135	0.293816772399343	0.1880878730922	1.56212501938025	0.118258539923226	0.307104414082924	0.226559473907845
LOC410882	797.008513970982	0.182206007488481	0.169358179850773	1.07586186654243	0.281989038598853	0.48741895127238	0.332827246788573
LOC550665	243.968583299688	0.00771390493577258	0.17306414867905	0.0445725183098328	0.964448048093506	NA	0.589119554138747
LOC724553	228.623359267703	0.298795965495785	0.20087456778535	1.48747533742087	0.136889312218227	NA	0.240600091740847
LOC413933	298.063999059007	-0.2233811318846	0.171363914726675	-1.30354825425698	0.192387653547974	NA	0.28147637342939
LOC100576274	42.8050233378735	-0.168932853554728	0.307699384393725	-0.549019147007994	0.58299230997927	NA	0.472676280390249
LOC413023	207.925790623872	0.0834934484727788	0.180358233987785	0.46293117107386	0.643413703603876	NA	0.493163100714052
LOC412780	228.510018938375	-0.486091198144395	0.25681253461217	-1.89278610905217	0.0583863196012817	NA	0.172896419504625
LOC102656247	81.4662250453391	0.0135331690927167	0.231518449833971	0.058453955192002	0.953387038176782	NA	0.586382889425261
LOC727293	236.044793819744	-0.11269345817427	0.231916253401927	-0.48592307145875	0.62702170986437	NA	0.487494093866162
LOC113218590	180.131690635668	0.301013250553963	0.187805906130238	1.60278905363721	0.108981234365706	NA	0.219613823396624
LOC727300	205.238199502675	0.263881909681954	0.193444344749513	1.36412315399372	0.172528808637645	NA	0.267586982343671
LOC410879	162.69811812349	-0.137445417757391	0.20584143582189	-0.667724732916843	0.504309319272789	NA	0.44123294336253
LOC727308	986.19325624922	-0.102365427538264	0.173855786722041	-0.588795055190912	0.555998763337807	0.726418293164796	0.462478479035943
LOC408702	650.20904335975	0.49933686542133	0.201776237033977	2.47470600483667	0.0133345893285063	0.115336228813494	0.0998566411276743
LOC408701	210.789545828848	-0.0146567757524273	0.174851674450209	-0.083824051433954	0.933196325035808	NA	0.582606471348494
LOC725009	235.784853903796	-0.463302059905468	0.24361784233481	-1.90175750456217	0.0572028642181563	NA	0.172233126935291
LOC100578611	315.986532667092	-0.121225683953195	0.187584788810395	-0.646244744693698	0.518120866094666	NA	0.44748664992172
Mir6037	461.789348719651	-0.285341420895717	0.227773499474352	-1.25274196319686	0.210299629013484	NA	0.290248576731952
LOC412330	4802.08226037464	-0.170705545609133	0.237238962087092	-0.719551055641803	0.471801456401505	0.658787853257247	0.427578483229951
LOC100578715	137.761580901321	0.158569434780204	0.225273270667216	0.703898133633662	0.481496213846519	NA	0.431593751591466
LOC412331	478.785529671527	-0.318643149855872	0.18817324000377	-1.69334996755908	0.090388872284065	NA	0.203850834075362
LOC725325	1093.86139690868	-0.196391645925876	0.149859041694285	-1.31050915383883	0.190023649582328	0.391452185704733	0.279636235466618
LOC725357	31.7204921126823	0.453488501587835	0.354943510259956	1.27763570393414	0.201377905378025	NA	0.285450775504912
LOC411871	1368.17637930247	0.138737623242178	0.181799892917493	0.763133690651521	0.445383669386206	0.635927620018056	0.415864685486405
LOC411870	418.27421712165	0.0152667837525248	0.160416068192776	0.0951699161095157	0.924179864968091	NA	0.579582829298098
LOC409246	1043.52347993959	-0.378582786883058	0.188180719998064	-2.01180432770665	0.0442405675767245	0.196614682106589	0.154639821710123
LOC409092	224.575685289446	-0.348269827768942	0.173192053467765	-2.01088803323048	0.0443372846376699	NA	0.154639821710123
LOC100578119	280.567502467535	0.155712159594698	0.191206592507723	0.814366061088655	0.415435275302791	NA	0.400709745748756
LOC409091	2587.44411652321	0.316443063427553	0.13777170306393	2.29686544036343	0.0216264470208575	0.14251718732087	0.119960428437025
LOC100578084	761.858746115029	0.0713277436274207	0.22699166438866	0.314230673710079	0.75334584744699	0.861703811805803	0.531648506860558
LOC413350	293.58682095352	0.387155181833696	0.269271476009499	1.43778757249445	0.150494336541987	NA	0.251669881434847
LOC413351	535.029231321087	0.0271548519646099	0.162373274803066	0.167237200811183	0.867183414562888	0.932469139681045	0.56529854002476
Cdc37	1426.74817644416	-0.374358190520802	0.175017618377605	-2.13897431579211	0.0324377485473942	0.169010110267423	0.137404464487421
LOC724599	2427.34040388285	-0.503680478651125	0.18781084827893	-2.68184976143165	0.00732163329773735	0.099687897969837	0.0875333710443229
LOC552075	4267.53073918484	0.053502128447433	0.156006988942929	0.34294699750282	0.731638334465608	0.846236986747381	0.522806854055719
LOC551992	500.287386307961	0.00522314990715379	0.171789950375974	0.0304042809007313	0.975744630770494	NA	0.592378884757951
LOC412700	647.521601316861	-0.0540820174944974	0.15188748220718	-0.356066324285549	0.72179089598356	0.837972211326368	0.519124304801483
LOC724808	977.372106254264	0.0952737787665561	0.151443511443721	0.6291043958127	0.529280712821354	0.705398745423748	0.451705560663194
LOC724850	272.456137026418	-0.244131812446561	0.185315067438669	-1.31738781859903	0.187708661996788	NA	0.279139014744132
LOC551872	613.688048138805	-0.103873742941119	0.155300104702745	-0.668858164261644	0.503585959444253	0.684158396716817	0.440670779924259
LOC413845	688.448476814536	-0.0434929511426983	0.172803510235891	-0.251690206311936	0.80128052759224	0.894845692079606	0.547132796700942
LOC409871	317.643195494218	-0.138356499100731	0.174073903138661	-0.794814711487918	0.426721292048116	NA	0.406720860493091
LOC551772	231.071934128057	0.554418568533159	0.202780357741143	2.73408418206312	0.00625540493176984	NA	0.0830434319346717
LOC100578436	65.921588500623	0.0345362975451519	0.295134926181307	0.117018673431878	0.906845255884723	NA	0.575310969223681
LOC102655100	15382.7389091173	-0.649873856767266	0.208187501465596	-3.12157959624037	0.0017988361311991	0.064020872800545	0.0544813405243081
LOC113218600	357.769169416264	-0.210907168576526	0.206072642121349	-1.0234603021799	0.306090260318165	NA	0.346275107123324
LOC107966103	7561.40974114496	-0.690700094636413	0.249057213401241	-2.77325874325779	0.00554979745358998	0.0892489649758803	0.0796122767678456
LOC408699	199.830248066651	0.259700161090481	0.255521822379724	1.01635217951971	0.309461709002735	NA	0.348396282777094
LOC113218601	27514.95685124	-0.412107763056906	0.208223246518528	-1.97916308552147	0.0477976476021059	0.20469587205164	0.15974519761525
LOC107966102	3994.80981942588	-0.638872032938593	0.30218646857811	-2.11416492586416	0.0345011834181566	0.173670939230539	0.140778888936807
Or12	52.9015881720509	0.322796583525874	0.368048610672272	0.87704877607406	0.380460145547056	NA	0.387215011238263
LOC100577938	40.1808910402396	0.133813316724821	0.347080135522426	0.385540118922119	0.699837288741663	NA	0.511678939392488
Or30	37.4637240200099	-0.0986039146220332	0.325707786549923	-0.302737357514539	0.762090025724342	NA	0.534498262477399
LOC100577226	59.9489817965981	-0.27975014717203	0.281224954114727	-0.994755774972605	0.319855060344954	NA	0.354484315041159
SPG11	344.803253601984	-0.359606567330472	0.193270887802525	-1.86063494310587	0.0627957467420777	NA	0.177813262510898
LOC726583	150.056120196401	-0.215549069983477	0.212416388812146	-1.01474783178854	0.3102260471548	NA	0.34897044859277
LOC100576571	289.095950944151	-0.167610065546276	0.194091595499769	-0.863561686505258	0.387828718886168	NA	0.390166072990048
LOC550664	326.727583790656	0.115656170331914	0.160577568690416	0.720251099049158	0.47137040721709	NA	0.427436918116332
LOC412132	1167.34097083628	-0.65023383982721	0.271028632580352	-2.3991333817265	0.0164339272560506	0.126294003797826	0.108728359754313
LOC552365	333.68558370292	0.0067798444197283	0.199860161779193	0.0339229407170135	0.972938599667196	NA	0.591201546849642
LOC726679	549.070049326013	-0.232864730116467	0.172727168399207	-1.34816504128795	0.177605305744091	0.377650459128718	0.271673281253598
LOC412005	170.920655349641	-0.354998431476324	0.193081907174189	-1.83858983304977	0.0659755377974325	NA	0.179748195129909
LOC726711	146.485277124848	0.310745273743515	0.198298770592987	1.56705597727243	0.117101607929548	NA	0.225582346981402
LOC102654653	2778.64002339242	0.202171792117182	0.15352583655482	1.31685843017694	0.187886082814718	0.389962414713913	0.279174397890901
LOC408693	1783.65321617836	0.0970245184409657	0.134951549779746	0.718958163869323	0.472166697221684	0.658787853257247	0.427661048900868
LOC107964030	33.6139077709562	-0.137534064499757	0.340767421182753	-0.40360097811697	0.686506166305593	NA	0.507608512430695
LOC726747	597.552458395053	0.21659729383614	0.30264896211611	0.71567168881631	0.474194096149359	0.660131697813567	0.428571707736932
LOC410874	967.749395581562	-0.458083056589077	0.207559309423621	-2.20699836524386	0.027314173551796	0.15687584862685	0.128635558036229
LOC408694	4771.16466735394	0.226072183413693	0.148749924200713	1.51981377219828	0.12855778676074	0.322471351886271	0.235660128813001
LOC408695	22968.1289750868	0.707140445214825	0.173101917512976	4.08511040995151	4.40558626519819e-05	0.00910907407785264	0.00800591809427841
LOC408696	8052.67939971348	0.626315349599404	0.156565321638187	4.00034530664958	6.32501225348426e-05	0.0109852812818515	0.00985194581837001
LOC726783	882.830796113057	0.483158081969853	0.184758263219876	2.61508239766715	0.00892059323028099	0.106118399468165	0.0907314046934439
LOC726793	1244.74227963694	0.561405373683159	0.215138358674962	2.60950849091188	0.00906723958263586	0.106491538304407	0.0915709613086718
LOC726803	955.144237208921	-0.106468638765255	0.21165114690069	-0.503038326625329	0.614937326037876	0.767815677353982	0.482798631996758
LOC100578437	941.957642208415	-0.00949155490185807	0.177307393280556	-0.0535316363646464	0.957308324604207	0.977307398028604	0.587417063791259
LOC408697	3011.01304923192	-0.124628150457294	0.152275211880356	-0.818440171045146	0.413105891663694	0.605200440426547	0.399476496105435
LOC726840	164.833146722254	0.374788241599748	0.192217326936215	1.94981507428889	0.0511981642045087	NA	0.164305475716923
LOC410875	259.586495872314	0.0582948121750177	0.177778430350544	0.327907114828676	0.742981894050722	NA	0.527200829761104
LOC410876	66.0192246108247	-0.408978933615276	0.270703995375776	-1.51079755231375	0.130840038538204	NA	0.237017851211365
LOC410877	521.426040802958	-0.366314872161823	0.174101453975287	-2.10403109105464	0.0353757350050846	0.175745356283841	0.142150831974374
LOC550806	1988.19385248302	-0.0590915419052385	0.134479544013658	-0.439409148347773	0.66036509891458	0.797359638344579	0.498212756052901
LOC551801	1350.25659187417	-0.377976257560872	0.203968261700204	-1.85311309911749	0.063866149698363	0.233253940433633	0.178387330403271
LOC726899	231.547227083163	-0.140289119478239	0.211338542074871	-0.66381228005509	0.506810465075151	NA	0.442568935490775
LOC726924	17597.1157676999	-0.204336453631227	0.166552915819252	-1.2268560572844	0.219876697068925	0.421131283049524	0.295707136420628
LOC551711	95.9397655670169	0.072067014655119	0.259840131119218	0.277351363489167	0.781510323468896	NA	0.540950715643513
LOC100576433	263.676788728171	-0.174291979644703	0.184662277350491	-0.943841818401788	0.345250487236677	NA	0.368203876403237
LOC411671	128.629970200848	-0.536950415273237	0.218121761119295	-2.46170034808938	0.0138280142686772	NA	0.101339180039282
LOC726956	391.291537849998	-0.156285484492056	0.176565532821753	-0.885141522212206	0.376080307150221	NA	0.38495336354438
LOC413186	1043.81886008909	0.462412836962275	0.177535612826128	2.6046201638155	0.00919761624088251	0.106491538304407	0.0917123945390962
LOC100578356	102.308892450692	-0.676320557323473	0.297960637319753	-2.26983189258549	0.0232177847256964	NA	0.123367169118826
LOC100577827	257.522312596048	0.193830985596592	0.253512528160562	0.764581486378573	0.444520796925899	NA	0.415530835130331
LOC113219427	36.1631822130775	0.147771063612866	0.332744116241486	0.444098201591107	0.656971586653325	NA	0.49737329584359
LOC107964072	37.7601988606137	0.11316914557906	0.323762551073107	0.349543655385599	0.726681202811557	NA	0.52140275914132
LOC100577670	722.074875302857	0.056870935906254	0.199235979030022	0.285445109779516	0.775303151760371	0.877572024229283	0.538568864999838
LOC726987	625.330842680765	0.353102296267587	0.176092854507501	2.00520513597868	0.0449411212463431	0.198307264686607	0.155262148837681
LOC410872	176.296396147756	-0.188207404254918	0.196799493210574	-0.956340898975473	0.338900033236988	NA	0.36513190455694
LOC410871	568.898626029123	-0.273881528076723	0.154806760663017	-1.76918325080716	0.0768632983897532	0.249992840156036	0.190729402432824
LOC724187	79.5578345265101	-0.227129969836002	0.783259978103168	-0.289980308180747	0.771831302460834	NA	0.537595645052456
LOC551364	335.020319671293	0.460945645280105	0.217685943444656	2.11748006318697	0.0342191255794558	NA	0.140437155808311
LOC410870	106.358801149228	0.439838427702262	0.261676522447431	1.68084787885632	0.0927924660255158	NA	0.205600552277239
LOC408691	984.766680691354	0.498024003062474	0.191192957392957	2.60482399484459	0.00919214660819438	0.106491538304407	0.0917123945390962
LOC410869	357.049640486076	-0.0295000892021357	0.167110845112495	-0.176530070099741	0.859877527089809	NA	0.563771390515208
LOC410867	9558.19066917681	0.410960815619502	0.163612403165657	2.51179499639405	0.0120118844915002	0.111339835231558	0.096275365006861
LOC408690	290.692728727621	0.395321539176151	0.191709330247871	2.0620881553601	0.0391993438267238	NA	0.148230117877865
LOC100578801	55.5420341277381	0.334957037399634	0.293437763799905	1.14149260498059	0.253664987620574	NA	0.316331326587125
Fabp_1	4925.97508890213	0.163231749452483	0.140287154816294	1.16355449411056	0.244604601972224	0.449079569455982	0.31187245393767
LOC551008	63.3114326913247	0.0104208674622079	0.273398300054105	0.0381160653162277	0.969595142347861	NA	0.59072628215016
LOC100578691	62.2333204545478	-0.232431665524231	0.299844384632852	-0.775174315199648	0.438236663216375	NA	0.412688685913033
LOC107964104	1893.05847781902	0.478161017994493	0.223253178141929	2.14178817956406	0.0322105310466476	0.168707027508497	0.137081056556197
LOC410866	1293.47600481104	0.508169912661761	0.179835425559458	2.8257497713861	0.00471700966835808	0.0855403366609028	0.0767627716434645
LOC724851	720.282713254025	0.326059294524012	0.235202399636105	1.386292380641	0.165657642501148	0.364195181640498	0.263066993244549
LOC410865	569.90363376141	0.24134291075141	0.153481730066783	1.57245367671055	0.115845374189949	0.303814207440894	0.224271833774084
LOC410864	512.412352057756	-0.324340257809544	0.18916129256188	-1.71462276143754	0.0864144128508958	NA	0.200592173584301
LOC410863	309.594748035974	-0.187830637478018	0.191460638990136	-0.981040481577495	0.326572779055332	NA	0.358720529745139
LOC100578478	45.3995807542684	0.519975235282477	0.327303273656586	1.58866493901325	0.112136058557353	NA	0.221942327902261
LOC410862	1430.47872201952	-0.0192855893207078	0.163828002934808	-0.117718515609216	0.906290695454446	0.954661377890151	0.575245998604129
LOC408688	1201.77926560172	0.302972377694929	0.165683282180253	1.82862370728095	0.0674559986832333	0.236586386334894	0.180888886600033
LOC551914	394.535731907112	0.230873233280148	0.17796758183936	1.2972769023099	0.194535928765783	NA	0.281952381305285
LOC410860	3034.44078539681	0.393050764584847	0.174753143737989	2.24917707445742	0.0245012324366321	0.150048450267781	0.124555727329162
LOC408687	367.942670580643	-0.105319035199487	0.182579560758782	-0.576839131180904	0.564048132480621	NA	0.465450307716119
LOC100578213	41.95587893553	0.154118126146995	0.316903769286728	0.486324686178005	0.626736979213513	NA	0.487494093866162
LOC107964035	202.328055779291	0.255876950656342	0.184065160779603	1.3901433034507	0.164485365933941	NA	0.262153975033323
LOC725143	249.609213467865	0.0319488360057523	0.182276954374259	0.175276332191471	0.860862508049359	NA	0.56393364185732
LOC100578144	25.3388808305273	0.642594631552653	0.45931573507236	1.39902594769896	0.161805202158019	NA	0.260964533342118
LOC100577530	2830.25479520875	0.301182868181212	0.127992339366868	2.35313198954762	0.0186160248307527	0.131428905559415	0.112570014503383
LOC100577496	31.7610517014245	0.264591270516086	0.339030622991592	0.780434723510648	0.435135035926015	NA	0.411091590464269
LOC102653640	87.432343799202	0.310559285945117	0.225647248842507	1.37630433137643	0.168727432491423	NA	0.265008480618032
LOC408686	3467.13369530087	0.0406770576196469	0.138804502694188	0.293052868099431	0.769481741722755	0.874309042761616	0.536872013098112
LOC410857	3305.61656639789	0.258216995121216	0.220182999615469	1.1727381113536	0.240900843162917	0.44631304024524	0.310671256262021
LOC102653599	275053.34824726	-0.280607017963554	0.186446454537179	-1.50502737453556	0.132317038985852	0.324404620709525	0.237519718322838
LOC410856	454.953470293572	-0.0948298904011973	0.168649895664504	-0.562288461712677	0.573919498375663	NA	0.469426982746076
LOC410855	284.194420803564	-0.077871644306536	0.163399006012116	-0.476573549662608	0.633665822055251	NA	0.490073772254076
LOC410854	249.428851125045	0.189865673179998	0.179202177483721	1.0595053913184	0.289369675225499	NA	0.337504884483923
LOC410853	1506.70954396708	0.158438409350527	0.188798461299097	0.839193329544813	0.401360829882056	0.59825457666333	0.395832616232803
LOC725491	1033.20608025755	0.131215520943402	0.171804776853867	0.763747803444437	0.445017547475695	0.635823030977121	0.415710065989731
LOC551477	217.408711540259	0.370444226512461	0.21018526952369	1.76246521629199	0.0779907283235503	NA	0.191842606564779
Eaat-2	2332.59116397543	0.425582407402111	0.131490599150941	3.23659949950928	0.00120963048198678	0.0552864795030166	0.0477861809992815
LOC725892	61.1844367422965	-0.201387633342713	0.268610262705686	-0.749739162287226	0.453411816117235	NA	0.419454715054876
LOC102655971	292.895840504483	-0.134754373496489	0.180212006382791	-0.747754692937909	0.454608134878166	NA	0.419987232128659
LOC551395	894.703923170205	0.515811194843962	0.145817945989293	3.53736428904186	0.000404141820080825	0.03095495421198	0.0280425045547984
LOC408685	19093.364229657	-0.168101212053665	0.164504440644645	-1.02186428156544	0.306845139917056	0.511055465101594	0.346769296731499
LOC410852	8067.44054505856	0.13159618846864	0.167602983673379	0.785166144327667	0.432356162597507	0.625138347651807	0.409709437079226
LOC724211	8878.89611030375	0.386201247974635	0.206025438898727	1.8745318541196	0.0608571558258268	0.228522089617817	0.174985477320911
LOC107966114	43.9552898050131	-0.0172548874681135	0.372252660165859	-0.0463526236734628	0.963029196725489	NA	0.588730632606458
LOC410851	1527.40523692082	0.322334810507364	0.184814278514747	1.74410123015275	0.081141439603812	0.256106229425678	0.194459838440755
LOC551122	143.534381402736	-0.522926781889593	0.231093414238791	-2.26283723234643	0.0236457248198106	NA	0.123367169118826
LOC410849	496.367776553397	-0.246598091537195	0.150444156883779	-1.6391337267269	0.101185412368275	NA	0.213538119344443
LOC410848	1012.549395242	-0.169982340716523	0.160580047849682	-1.05855206168354	0.28980382885904	0.495826210812693	0.337609076952554
LOC113218605	3119.47739264978	-0.484022357891955	0.193451236347987	-2.50203806928005	0.0123480646299552	0.113084651929042	0.0972649606054269
LOC724508	461.460783755658	0.0401694480079182	0.150463817511894	0.266970815124659	0.789491631934436	NA	0.54288029081546
LOC100577751	109.602128424029	0.266406990242892	0.210322511502765	1.26665941909594	0.205277096254218	NA	0.28761262962315
LOC724600	66.8733323924996	0.281322505569896	0.251982934917125	1.11643475246616	0.264236084716986	NA	0.323343210864379
LOC724648	101.722991779387	0.363636903042411	0.233639801802807	1.55639963840289	0.119613091135215	NA	0.227446736007237
LOC410844	218.47820838288	-0.100563886529764	0.174380120899721	-0.576693524530779	0.564146507583935	NA	0.465450307716119
LOC550739	544.282735378317	0.0813832891464856	0.152210618929	0.534675502400051	0.592874264218865	0.752391310510975	0.475945862865158
LOC724775	1053.75556592547	-0.32925536427005	0.173162265311758	-1.90142675528797	0.0572461378269964	0.22312632894508	0.172233126935291
LOC552124	2132.40340652573	0.560281654318441	0.225840591691628	2.48087223878457	0.0131061339587693	0.114500671325908	0.0990559892831347
LOC552101	2300.85729285642	0.2120711717934	0.160636255727284	1.32019493876549	0.186769941358782	0.388947283155795	0.27850274704043
LOC102653857	170.62376396888	0.0471231805152133	0.208713599287611	0.22577915706526	0.821373188776589	NA	0.55297832409208
LOC100577719	478.301396235239	0.0264600135845742	0.159260215378	0.166143273897828	0.868044199727819	NA	0.565443838539119
LOC552074	1688.24932337707	-0.127344066739384	0.138042945295937	-0.922496013587531	0.356269908727506	0.558456297362755	0.374159521512036
LOC113218551	110.63890740817	0.232825889908469	0.244559997855619	0.952019512389441	0.341087086213935	NA	0.366546521631648
LOC552044	2542.61270769313	-0.175725515050465	0.139955375951192	-1.25558245873848	0.209267394443537	0.410606889400796	0.289738172127312
LOC725101	294.401427863443	-0.02405267888968	0.186055750418954	-0.129276729343323	0.897138684198075	NA	0.572968136824764
LOC100577635	745.049606071197	0.251578656461854	0.18626772980673	1.35062931578589	0.176814205093694	0.37652147058206	0.270895646554536
LOC413130	1285.7747352856	-0.12664623671849	0.139354554350552	-0.908805867943913	0.363452608611323	0.565954344414912	0.378271257856369
LOC408681	98.2222402751181	0.336750248479454	0.302105430732601	1.11467790454094	0.264988472792378	NA	0.323787844305382
LOC408680	26535.4810242202	0.278193113765691	0.16266796962978	1.71018986957812	0.0872307683941163	0.265077445413349	0.200816473754516
LOC102656010	139.404754967436	0.456366204809912	0.270926429626615	1.68446543011277	0.0920917550037298	NA	0.205060140909003
LOC725294	2991.92882253011	-0.0220862219591727	0.170484612968438	-0.12954965010984	0.896922740810669	0.950012458386597	0.572968136824764
LOC408670	1409.02815330893	0.339793328211579	0.164811144475319	2.0617132979285	0.0392350397730629	0.187739854336758	0.148230117877865
LOC100577606	141.12778982016	0.222543870762411	0.195500765257579	1.13832736393232	0.2549838118433	NA	0.317297701135683
LOC410831	3764.57598053504	-0.0692307732188652	0.14202194982283	-0.487465305927917	0.625928623443246	0.776312635325248	0.487285521984659
LOC725589	56.2184148872206	-0.526390176280517	0.296964203938559	-1.77257113584446	0.0762997981410505	NA	0.190283845337626
LOC551689	347.569839951751	-0.308226918515533	0.175963429715089	-1.75165327826696	0.0798334453198253	NA	0.193175643839112
LOC409221	582.995769089382	-0.384580146908953	0.239102598952594	-1.60843147917937	0.107740711929336	0.292930601876756	0.218656555593578
LOC725696	749.942405321889	-0.482171139470555	0.204920721384359	-2.35296428888796	0.0186244226451595	0.131428905559415	0.112570014503383
LOC725718	5600.34140627486	0.315428023872566	0.170735583537061	1.84746505290795	0.0646797685352862	0.233257565646874	0.178901701166833
LOC107964096	34.03913375922	0.27764486266378	0.351609595815168	0.789639605881892	0.429738271176787	NA	0.408538790738586
LOC551595	493.739816752722	-0.370040969261956	0.178623881705986	-2.07162091500756	0.0383008078640957	NA	0.146964140866825
LOC409236	2614.22773210256	0.164337821417162	0.169183809954142	0.971356665047954	0.331370700201036	0.534952080866975	0.361112567282102
LOC725758	76.7995258198088	-0.120131076464417	0.26643291212196	-0.45088677486446	0.652071155724466	NA	0.495921394415933
LOC409235	3386.05545601067	0.268437313764641	0.164613908118317	1.63070858855803	0.102951823493715	0.286549242057506	0.215206380913675
LOC551476	124.983660880482	-0.148051924669075	0.227676663910469	-0.650272725039991	0.515516071928101	NA	0.446691682129836
LOC409322	2201.94732813434	-0.301680543986052	0.18522231630248	-1.62874836039405	0.103366300548996	0.286783691363414	0.215576828239088
LOC412030	230.421615879021	0.0932067209486307	0.172920542140824	0.539014739340364	0.589876684329778	NA	0.474321968535893
LOC725930	58.5405565101676	-0.0143081076737087	0.316496651819869	-0.045207769470661	0.963941701441561	NA	0.589002635192932
LOC725957	1619.35524577392	-0.11373574102474	0.134115838556787	-0.848041083354839	0.396415091210077	0.595170928780828	0.393979942638461
LOC551330	6134.86722946182	-0.0362440728488632	0.204530785158823	-0.177205953718502	0.859346619284389	0.927641305024805	0.563584394822855
LOC551290	185.944305676471	0.0433774939610604	0.19910408027069	0.217863410443858	0.827535536586351	NA	0.554912866733894
LOC410828	591.577087490017	0.225427539819246	0.195971676992372	1.15030673451869	0.250017558031223	0.453285865148527	0.314542396113202
LOC410829	8864.42961178093	0.444875164293858	0.228827202807933	1.94415331234576	0.0518769659266629	0.21273027517488	0.164930131922539
LOC551167	22160.7082202794	0.443281436910686	0.181381264727463	2.44392075210605	0.0145286174875658	0.120158585011449	0.103785027435705
LOC551121	316.428846088275	0.13946678784158	0.195878658150154	0.712006040671718	0.476461035407345	NA	0.429883624506119
LOC726230	7167.59843149719	0.537026226004718	0.180143037328325	2.98111008878986	0.00287205525432777	0.0766176215992134	0.065306832907097
LOC412133	953.83351238015	-0.595658787303845	0.202639422660059	-2.93950100866159	0.00328741200654162	0.0778288305053575	0.0669460205053888
LOC726428	132.69800253458	0.292123949161055	0.213817202095056	1.36623221283752	0.1718660897928	NA	0.267250100882868
LOC411763	68.3641108002607	-0.320100790585786	0.283379323162836	-1.12958414542422	0.258651494754365	NA	0.319547371661052
LOC726438	253.748004500921	-0.438929196259177	0.232289528246737	-1.88957806050106	0.0588144136950167	NA	0.173692378847886
LOC100576706	200.946812250293	-0.28336242884242	0.226613383788848	-1.25042230121081	0.211145322187965	NA	0.290921342596726
LOC550738	1651.38506294721	0.218755993755268	0.127029914354495	1.72208250998893	0.0850545729238277	0.263297019781762	0.199203057026547
LOC550663	3076.73620435511	0.111104025462328	0.137963257540682	0.805316048945615	0.4206373228396	0.61247728228355	0.40372733671886
LOC410825	1380.26245863916	-0.393653445046476	0.177673225037503	-2.21560364519405	0.0267186590010878	0.155304440940727	0.127660840883459
LOC100577139	4091.36671371378	-0.136373373711829	0.220362876568813	-0.618858202594045	0.536009775700009	0.711729188406556	0.454471620266382
LOC100577106	46.0963301373287	0.133923557019197	0.336704766761419	0.397747731068185	0.690816149643224	NA	0.508863909210726
LOC552073	633.948463238198	0.51000861213992	0.196947077968708	2.58957186570167	0.00960953625034588	0.106491538304407	0.0917123945390962
LOC408669	2409.5803554281	0.417800827468113	0.203516640016042	2.05290745481638	0.0400815538823243	0.1885526619253	0.14864691592653
LOC410824	1477.76150983854	0.354948195389672	0.23823202273193	1.48992646462594	0.136243572153062	0.329027108753665	0.240373302481172
LOC410823	312.193159045849	0.473358504045671	0.181538627690824	2.6074808985107	0.0091211159384664	NA	0.0917123945390962
LOC408668	676.880620820895	-0.210396729961219	0.169224613625525	-1.24329862809912	0.213757809576344	0.415537016085905	0.29232930711106
LOC724554	3377.9154636378	0.263871454583648	0.153838947652784	1.71524479730067	0.0863003548049592	0.264955614995828	0.200592173584301
LOC552211	1626.06034331464	0.383281392845725	0.227484200623892	1.68487038569953	0.092013581318984	0.271721096103652	0.205060140909003
LOC410821	4209.07363544428	0.679256804867847	0.197481455816299	3.43959792103064	0.000582578991596587	0.0377545967389907	0.0334318109309252
LOC102655220	162.574168722146	0.197989692996587	0.286880187907798	0.69014766910366	0.490101328397903	NA	0.434709157922826
LOC724114	3947.44132369456	0.367471629923534	0.168929431695614	2.17529666817126	0.0296078920522328	0.164395738223523	0.133288301396693
LOC552277	4569.62430723112	0.396048855790955	0.246422364923022	1.60719525565252	0.108011542467458	0.292933240096004	0.218656555593578
LOC724776	285.076408072706	0.300570321496832	0.169178030130287	1.77665103007381	0.0756256740313419	NA	0.189905753614438
LOC100576118	1843.59844347811	0.30386892729935	0.175821057942868	1.72828517160948	0.0839371102262964	0.262197793239265	0.198022420589914
LOC552320	57.6310789400983	0.451830107621893	0.279813555072286	1.61475417981509	0.106363939395474	NA	0.218070243669359
Mir6060	1155.13027290785	0.599925340189507	0.18100630147429	3.31438925221462	0.000918435541845954	0.0480463508758449	0.0413801441643699
LOC724919	1249.23655717036	0.631650529656803	0.198418767325945	3.18342129713557	0.00145545674467084	0.0612160557735173	0.0525473771546913
Vamp7	502.273674380564	-0.106556873190126	0.159817472970651	-0.666741071607949	0.504937539252679	NA	0.441569988969804
LOC410820	4287.87607414017	0.497167935736456	0.133980423459955	3.71075059249274	0.000206645621919055	0.0197236806015677	0.0184749868666658
LOC410819	5161.59625061348	-0.0855443927855671	0.169165896919544	-0.505683440594722	0.613078894946482	0.767143677768768	0.482650923531964
Eyg	111.461157862251	0.615477646293579	0.274063412859628	2.24574903987209	0.0247200871068047	NA	0.124687390283123
LOC100576949	195.59517470885	0.013576854821782	0.22503374576846	0.0603325282411261	0.951890795333957	NA	0.586073523984926
LOC408666	2080.27739862332	0.450959410618311	0.166829829367753	2.70311018315696	0.00686939708912577	0.0979404579516211	0.086299084431603
LOC100578654	175.246590568883	0.0162794058998425	0.20069140068341	0.0811166091043594	0.935349217059882	NA	0.582832899145959
LOC102653940	1777.35149986737	0.242061891864421	0.12606510345635	1.92013400400084	0.0548409751211996	0.218458269702981	0.169294620015789
LOC102653975	28.08919699763	-0.318042988973651	0.374561856617883	-0.849106718568273	0.39582191224693	NA	0.393787428846122
LOC725144	541.377495582108	0.276948912481003	0.175052596154395	1.58208971797674	0.113629090527943	0.300839945775809	0.22274975224722
LOC100578484	73.821790623501	0.639158779620384	0.272736144910468	2.3435059545562	0.0191034573043448	NA	0.113930901209639
LOC107966086	36.7251871644685	0.470810675024083	0.333490190881379	1.41176768581943	0.158018376130401	NA	0.257537313027525
LOC408664	5205.32248846133	0.240142930805019	0.165363579293206	1.4522117375025	0.146442740031804	0.340029078726252	0.247552214155128
LOC725358	1068.0127206438	0.227753647317983	0.145258257024471	1.56792220961053	0.116899287884452	0.305217503303843	0.225454224174141
LOC410816	865.897381238603	-0.16393821545039	0.150228294813886	-1.09126057546941	0.275158240097776	0.481166765406582	0.32968547536477
LOC100578170	116.614332246517	-0.231614432145356	0.252524224918075	-0.91719688366729	0.359039479531729	NA	0.37583733332174
LOC102656585	4955.69383467602	0.534226220785193	0.180737696481199	2.95580961352334	0.00311849523998612	0.076872096515376	0.0659415777486609
TpnI	32492.2021353915	0.102125564154267	0.187773481719866	0.543876394147204	0.586526534146817	0.748232189077003	0.473863525259599
Kakusei	31.7797798919445	0.390528697012284	0.411870559510849	0.948183083238794	0.343036257644564	NA	0.367230951226686
LOC408663	648.060932731182	-0.0240578306620825	0.186520141927229	-0.128982480999123	0.897371511162398	0.950012458386597	0.572968136824764
LOC100577903	912.036159933408	-0.673159575958788	0.222757058414989	-3.02194498683276	0.00251156188570567	0.0740503577522716	0.0625213658087917
LOC100576818	360.06676614419	-0.258994816276757	0.182585352740995	-1.41848627170084	0.156048843939335	NA	0.255934143821059
LOC408672	523.349488940787	0.0813667473662655	0.178388961961483	0.456119854455086	0.648303793620342	0.790490051081024	0.494381207293369
LOC410833	64.7182218162603	0.187587661757076	0.268654512525668	0.698248691203925	0.485021680676815	NA	0.432726114062348
LOC725697	943.726628467234	0.110923203334533	0.181450028061451	0.611315437752186	0.540990772741786	0.715224078200924	0.456540965311831
LOC408673	430.304719127008	0.181099612675974	0.165680766966581	1.09306358240425	0.274365884134351	NA	0.329177955373172
LOC408674	159.021140419545	0.377575144805644	0.22222793033086	1.69904450913753	0.0893107976045095	NA	0.203292433792115
InR-2	990.608375011575	0.502132420897637	0.207840817400292	2.41594710403084	0.0156943411103448	0.123437799501415	0.106617929616471
LOC725893	4599.3565118241	0.319394859558809	0.155970522001631	2.04778989939822	0.0405805904831041	0.189165654307619	0.149282611027361
LOC408675	639.921533236762	0.0467259276593565	0.183732540219789	0.254314927576034	0.799252268298275	0.89358303471582	0.546688824002205
LOC100577661	296.18390091326	-0.0401814450059049	0.161684414518823	-0.24851773824636	0.80373384734942	NA	0.547710363968091
LOC725958	78.7363675687972	-0.307301054418725	0.237694484453293	-1.29284049280963	0.196066232241394	NA	0.282923835787751
LOC408676	2353.71266170915	0.235648622017131	0.175695496921263	1.34123313429448	0.179844771648568	0.379751927931613	0.27280255397283
Obp1	16143.3563831084	0.29388928058518	0.212260173994073	1.384570996316	0.166183685189163	0.364520484043087	0.263354852343505
LOC102656639	175.431362762261	0.398167157152584	0.229905809336496	1.73187079657398	0.0832965693971641	NA	0.197179547254023
LOC408677	33898.3968627238	0.589964696364773	0.199449494914746	2.95796535667815	0.00309676925212174	0.076872096515376	0.0659415777486609
LOC102655088	127.574861944725	0.676401935368462	0.242443388559202	2.78993764023923	0.00527181943724262	NA	0.0778730702194281
LOC410837	1856.85135207605	0.108970567007216	0.234417567513751	0.46485665798415	0.6420341104767	0.787711813418997	0.492814425830304
LOC410838	3750.21015981708	0.308252498090532	0.122503003729353	2.5162852232714	0.0118599160634665	0.111339835231558	0.096275365006861
LOC408678	2431.36118460116	0.263335048455921	0.156343816032653	1.68433299850455	0.0921173315210905	0.271721096103652	0.205060140909003
LOC552747	1883.35381195458	-0.374561661990782	0.172563986115153	-2.1705668165363	0.0299639327529471	0.165422591918411	0.13419187053353
LOC726231	6991.65070197788	0.132019508300478	0.193424711989988	0.682536925826272	0.494899501944552	0.676591195668528	0.43677775630066
LOC726280	3646.18596323223	-0.113868535423437	0.176228515192993	-0.646141376716112	0.518187801036539	0.697017172274055	0.44748664992172
LOC726332	62.6616388948044	-0.216782934491816	0.261771389811484	-0.828138379247379	0.407592136458793	NA	0.396866112524443
LOC413164	3156.81815433913	-0.00513090938528049	0.1350326732962	-0.0379975398548588	0.969689643524726	0.984276907842962	0.59072628215016
LOC408662	245.338546133662	-0.374471538636271	0.171704219418412	-2.18091052103823	0.0291900353827114	NA	0.132397149995421
LOC726461	6302.35403154194	0.291612491822084	0.163946835457965	1.7787015589993	0.0752887034694814	0.248595855866531	0.189708500594838
LOC107964028	34.2786438868775	-1.27763575461472	0.513574106983065	-2.48773397498572	0.0128559857420344	NA	0.0984360269129291
LOC408661	2464.61728355917	-0.144116319994548	0.197081378312392	-0.731252852139636	0.464624722985003	0.653726684122127	0.424410505710281
LOC411764	407.353334507031	-0.0896211264903209	0.173599308430326	-0.51625278522518	0.605677867779243	NA	0.480143847038537
LOC409192	3810.08905418115	0.384026695270975	0.18994371161214	2.021792098362	0.043197834430407	0.194569499063099	0.153320224934496
LOC411765	3416.24713383877	0.089639785507824	0.126231904614366	0.710119884364181	0.477629796583801	0.663001463160763	0.42998678101379
LOC411766	231.12524574073	-0.387351103171705	0.181398292041519	-2.13536246021019	0.0327314145740978	NA	0.137460759754819
LOC409234	1207.07658971503	0.0603508673327395	0.139546899853781	0.432477306167143	0.66539454261601	0.799873506101527	0.499449839951296
LOC113218594	149.983967753294	0.0440959957283839	0.195768688071274	0.225245396303262	0.82178837554774	NA	0.553004783761495
LOC552595	127.942584485772	-0.0314248120000008	0.21036385841395	-0.149383131859863	0.881251321208164	NA	0.56872861259657
LOC411906	421.053531936187	-0.599770349608363	0.269459134147043	-2.22583046407724	0.0260255394387337	NA	0.126585046545791
LOC725441	393.545513326039	-0.233503659408686	0.192482748345367	-1.21311474101417	0.22508595483929	NA	0.2991903430798
LOC552562	418.334733543199	-0.148526113462701	0.152976892317477	-0.970905547972963	0.331595315179469	NA	0.361112567282102
LOC412175	974.278008513277	-0.0636442724215304	0.146563145387255	-0.434244722664534	0.664110739917885	0.798939789954125	0.499169052270762
LOC552183	1472.97851050704	-0.188502723735184	0.133051917163853	-1.41676067322686	0.156552911258295	0.353757527221724	0.256298227395824
LOC411697	427.258727024454	0.196316134846081	0.193102347547627	1.01664292194926	0.309323327723897	NA	0.348396282777094
LOC409164	1190.87976250081	0.360254248852966	0.229971859877097	1.56651448157829	0.117228221007059	0.305485350926932	0.225605587984453
LOC724299	2193.12727818606	-0.360332424055185	0.251081775350591	-1.43511978737622	0.151252965831753	0.347603834737736	0.251955424585973
LOC107964046	98.9288512269412	0.687709581321557	0.303859483429246	2.26324870153901	0.0236203625889729	NA	0.123367169118826
LOC724341	581.598201064617	-0.490812575938648	0.249467316645628	-1.96744239902117	0.0491322303745775	0.206283411355537	0.161444612252886
LOC412315	341.515294309725	-0.424242008777449	0.182541183035495	-2.32408929164744	0.0201207088552123	NA	0.116229331720317
LOC409430	5606.93975416099	0.0992017804957093	0.141688491191179	0.700140001927589	0.483839876425396	0.666931029663197	0.432105950902353
LOC552311	91.3826582578063	0.689799992942319	0.255987816729343	2.69465946370271	0.00704606019461404	NA	0.0867471539818856
LOC412314	323.235652876984	-0.140920186241128	0.217697242642268	-0.647321870184162	0.517423649939585	NA	0.447253455643053
LOC724555	632.504839568055	-0.0529630650838851	0.194190607630287	-0.272737521810116	0.78505498951291	0.884753348548217	0.542070364541247
LOC113218520	128.670136485988	0.0338454796968078	0.240697017318097	0.140614454112985	0.888174528965604	NA	0.570522530790227
LOC102656130	6380.36473595625	0.259204072103593	0.174959669575853	1.48150755389497	0.138471373486946	0.329971148784762	0.241567589758523
A4	4444.54738647373	-0.211056673606539	0.196489831932863	-1.07413534598906	0.282762024714168	0.488331739976315	0.333123980726803
LOC409151	2165.35519166737	-0.269265753934809	0.178426327295901	-1.50911447887542	0.13126953007761	0.323796220150905	0.237280080608451
LOC102656093	158.408796036163	-0.38279493175011	0.196068806498876	-1.95234998664769	0.0508966665546082	NA	0.164020498094689
LOC724792	496.650273294951	-0.336508599755242	0.200895917180845	-1.67503951537412	0.093926478870802	NA	0.206557135791996
LOC726589	558.66692965207	-0.206803103651583	0.166424268637517	-1.24262588229853	0.214005727718849	0.415537016085905	0.29232930711106
LOC726570	1549.66229982126	-0.317314329166725	0.186274626424521	-1.70347585850777	0.0884790521036483	0.26734589021158	0.202416125108119
LOC551492	126.804617093686	0.0674690072132878	0.20163419002613	0.334610946707721	0.737918586212398	NA	0.52490014476395
LOC725376	207.415864862148	-0.260390911229822	0.203074370422678	-1.28224408963005	0.199757034208452	NA	0.28448465140887
LOC107966087	54.537308898704	-0.063310514940954	0.306252955227449	-0.20672621720151	0.836223681282231	NA	0.557311296980855
LOC550895	235.613546173938	-0.196527235538402	0.182591535201613	-1.0763217217129	0.281783397282756	NA	0.332827246788573
LOC552092	762.061906097417	-0.755723487632534	0.262706932337724	-2.8766788942631	0.00401884322024777	0.0808424797225438	0.0717463568881679
LOC409086	8018.88497220151	-0.126246770937718	0.15499074191849	-0.814543948722508	0.415333405836663	0.606993486416287	0.400682379291078
LOC552037	57.3555723914299	-0.0423457161929237	0.276681380598409	-0.153048665946867	0.878359897459734	NA	0.567819368574746
LOC725138	105.850885549212	0.38213563635351	0.266605660706219	1.4333365440976	0.151761683215274	NA	0.252281410740214
LOC552012	308.661904040255	-0.136352348393108	0.169778914383099	-0.803117094302027	0.421907058217097	NA	0.404341511701462
LOC725070	730.209999479816	-0.272629824030934	0.166499678144165	-1.63741952578956	0.10154284111297	0.284515014646349	0.213538119344443
LOC409087	304.970864310692	-0.0884346668250391	0.180068163703256	-0.491117724567766	0.623343185992237	NA	0.486537598536451
LOC409088	128.22375158219	0.326972511682658	0.230685594225611	1.41739458322169	0.156367595505438	NA	0.256173716553245
LOC724986	551.144504195692	-0.2691014408223	0.177866444300609	-1.51294102651255	0.130294639466494	0.323724417418537	0.236919888592903
LOC551891	1064.12652031377	-0.368608929714807	0.135495748662342	-2.72044645941909	0.00651938284254301	0.0966114686086066	0.0848244690868254
LOC724734	229.852007708017	0.0285107820978225	0.195874601509174	0.145556299173822	0.884271668669137	NA	0.569437156517267
LOC408660	445.181200547094	0.341813383988034	0.204558905553195	1.67097777074851	0.0947260686299919	NA	0.207206078770074
LOC551688	109.342425422761	0.30325595430612	0.221122308024193	1.37143989231941	0.170237868927828	NA	0.265998483450299
LOC724852	1386.4142328395	0.145429017407099	0.260976180103577	0.557250157272516	0.577356524800008	0.742559843211384	0.470626634270961
LOC102654200	1023.01274726076	0.14119011058651	0.251764085381569	0.560803223273586	0.574931689126653	0.741197563594991	0.469622233289057
LOC113218542	61.9929158837475	1.03117403699577	0.397456822833733	2.59443033244178	0.00947478134608657	NA	0.0917123945390962
LOC410812	352.608270894669	-0.114521866822922	0.152359384583641	-0.751656139435589	0.452257873268352	NA	0.418884766026179
LOC410811	1475.40964252985	-0.220234428191359	0.136030712459917	-1.61900518058562	0.105446148462936	0.290696620080044	0.217652356614632
LOC725059	81.2870423969677	0.422716586734146	0.307284003412968	1.3756543849959	0.168928660559928	NA	0.265099117690471
LOC725091	458.474853951985	0.276613496486148	0.155448919612073	1.77944946273312	0.0751661033334901	NA	0.189672272767405
CSP2	743.994946756176	0.354465333675465	0.202924367759283	1.74678545307061	0.0806745608569067	0.255872128006347	0.194176689054665
LOC410809	392.58882573562	-0.0137380409914429	0.204293297993531	-0.0672466553057358	0.946385343593843	NA	0.584564948317254
LOC551535	501.70642824705	-0.745914771091536	0.219012735231933	-3.4058054674383	0.000659691671679397	NA	0.036584626444786
LOC551563	345.170363180249	-0.104277239528444	0.170491490026095	-0.611627240236351	0.54078441114187	NA	0.456520013426927
LOC413142	249.723566486849	-0.0482131970017801	0.181311937167415	-0.265912977132124	0.790306230501852	NA	0.5431320009296
LOC552620	603.396720100799	-0.198787043614108	0.147733152440251	-1.34558181647485	0.178437419104436	0.377970152144945	0.271856530819456
LOC552593	221.78176870704	0.0874450237080543	0.195185265817867	0.448010372820107	0.654145710542153	NA	0.496422041893643
LOC552580	588.802053553173	-0.486902466944287	0.188936832982559	-2.57706482774184	0.00996432608064001	0.106757330610312	0.0917123945390962
LOC725397	526.78552958869	-0.2247039997123	0.18560807428926	-1.21063698641747	0.22603456245064	0.428951953741555	0.299747840073515
LOC100577742	269.492972043966	-0.360454423137936	0.210982850997039	-1.70845365599404	0.0875521985785366	NA	0.200970415458531
LOC725473	150.189858785969	0.242425046169837	0.210121247211109	1.15373885024712	0.248607250973232	NA	0.313514219862002
LOC409034	2933.82861276766	-0.255005106046726	0.207384479266989	-1.229624834742	0.218837625715431	0.419882002146002	0.295011900389811
LOC550804	4310.2763677209	0.0691650881186204	0.180189293640135	0.383846824200075	0.701091980815211	0.823103347933059	0.511948221042546
LOC410808	561.370109344006	-0.118350062385523	0.148905446397043	-0.794800091260286	0.42672979790753	0.618774916153126	0.406720860493091
LOC725626	2450.63054969344	0.048888339436112	0.141087596566899	0.346510541151155	0.728959063645302	0.84448779464992	0.522143776719265
LOC113218611	205.763807443559	0.247513783335404	0.212079204009771	1.167081819696	0.243177329031928	NA	0.311714058149585
LOC100578899	5531.17864148599	0.190701150693631	0.164796303691126	1.1571931312917	0.247193463392618	0.450404539677191	0.312816732727224
LOC413209	543.387929691217	-0.0346673637290358	0.145075969877605	-0.23896006870251	0.811136546372211	0.900065137834945	0.549371952646763
LOC413208	2052.90947400811	-0.0621189394246312	0.146533845244934	-0.423922127483916	0.671622606127684	0.804310841677195	0.501544008319077
LOC413207	3515.96456862998	0.0511025367911712	0.132401171432057	0.385967406771736	0.699520807628707	0.822909901569007	0.511678939392488
LOC409821	49620.5563493025	0.0535816386244756	0.254041904532835	0.210916536478532	0.832952400140222	0.914308759511777	0.556374052462486
LOC725828	373.352938595038	-0.0206943064191143	0.182313956494561	-0.113509172950956	0.909626891120859	NA	0.575487487912941
LOC409820	587.712617385916	-0.0707618371297168	0.155970353958813	-0.453687738301875	0.650053593528568	0.791512255496647	0.495262490833566
LOC410130	842.624990404276	0.0989851496809406	0.161994038820414	0.61104192723212	0.541171823792592	0.715224078200924	0.456545852093769
LOC552319	737.20799112905	-0.0774608740328745	0.137716110583517	-0.562467773048955	0.573797354742067	0.740394684781591	0.469409896204568
LOC408649	2580.5145679179	0.0934447979622538	0.142572903803513	0.655417652789307	0.512198888955717	0.69217789475435	0.445337457046901
LOC107966106	54.0567452498089	0.239980790248122	0.295757453391283	0.811410794542618	0.417129802181684	NA	0.401532500291934
Dnmt3	815.626941019616	0.410017720521403	0.194597379248903	2.10700535692704	0.0351171152285017	0.175464343293619	0.142128091641286
LOC100577927	751.06091073228	-0.013372726921561	0.151419093523777	-0.0883159884949456	0.929625531628263	0.967525589231477	0.581494937985455
LOC410796	704.680972618008	0.206668310902614	0.147418849591468	1.40191238417163	0.16094141188089	0.360395879518735	0.260239087864294
LOC102655645	66.259366891213	-0.0178478437353503	0.273301658409836	-0.0653045570202364	0.947931514114337	NA	0.584877754974474
LOC410795	6750.9724904821	0.462250341348909	0.166328532433439	2.7791403831083	0.00545029650317115	0.0887670014263319	0.0789682725161287
LOC107966105	101.610929396162	-0.190171760966132	0.25679566682248	-0.740556736487284	0.45896224815675	NA	0.421892351307213
LOC726128	1023.26786387179	-0.103888633056064	0.155197622855534	-0.669395775170915	0.503243045929618	0.684047932238924	0.44060321499681
LOC408648	1613.60328732737	0.0894709483748866	0.12806263877616	0.698649889069304	0.484770857635965	0.667578516922093	0.432608518360849
LOC410793	2140.84462817367	0.49383801829805	0.171658440415604	2.87686417925279	0.0040164843175673	0.0808424797225438	0.0717463568881679
LOC410792	956.185325930534	0.135031603430661	0.135766914674052	0.994584017430484	0.319938623975962	0.524495922988394	0.354484315041159
LOC413787	812.001261615657	-0.091993398486648	0.152190308712291	-0.604462920569782	0.545535914165161	0.719112022353917	0.4587499320842
LOC413940	1328.38854663204	0.287263746431489	0.145842600485828	1.96968338108728	0.0488746688056663	0.206233053405445	0.161093126396945
LOC410133	1719.87803292687	0.407053575529355	0.16318443456482	2.49443874113903	0.0126156500423655	0.113483315948308	0.0978610673903778
LOC726304	366.537128604454	-0.0056502714581751	0.16670975907651	-0.03389286559752	0.972962582349744	NA	0.591201546849642
LOC410132	670.562583553005	0.0154081364181978	0.144289761159859	0.106786069187037	0.914958699454232	0.960590174536832	0.57739726137276
LOC410000	393.895858100005	-0.0301482065170664	0.165731399156492	-0.181910046439655	0.855653320128094	NA	0.562693627982446
LOC410799	924.186129665609	-0.298496585918821	0.139575801521734	-2.13859840075746	0.0324682071439493	0.169010110267423	0.137426704719887
LOC726375	250.621992477051	0.457117897149072	0.221820052964969	2.06076002164359	0.0393259402509897	NA	0.148326211531416
LOC408650	1849.22751542147	0.530289221288607	0.182530441087614	2.90520977284042	0.00367007037395811	0.0792808237001299	0.0694721264224121
LOC408652	5011.3771852116	0.36349278630666	0.146668244785737	2.47833324001167	0.0131997798220728	0.11462688797488	0.0991194204871275
LOC726419	612.538259068129	-0.262271267865709	0.166413047080054	-1.57602587337723	0.11501984056365	0.302676453168102	0.223467197446056
LOC408653	3852.05411666316	0.211123641252872	0.197633164075194	1.0682601892289	0.285403161098181	0.491559113640738	0.334661337769807
PDHB	2858.46663240363	0.322023799309672	0.173463494128516	1.85643556258062	0.0633914997154854	0.232667702252441	0.177863532594368
LOC408655	574.086375509936	0.16856594014623	0.154951524875827	1.0878624155607	0.276655850380635	0.482387171092355	0.330113618101091
LOC726478	507.99078642576	0.497140509516014	0.175082793061684	2.83945955409144	0.00451900235069166	NA	0.0747289719336044
LOC410801	170.256279056643	0.503280283613152	0.209072298091404	2.40720692414796	0.0160750588188455	NA	0.107134156564871
LOC410802	1775.89008232413	0.405202051341795	0.159815360475521	2.53543870962178	0.0112306579190143	0.108639341861686	0.0936471548641946
LOC551687	2280.23813818864	0.356279641306276	0.152238048503703	2.34027987620722	0.019269293731438	0.133745005257301	0.113930901209639
LOC100577377	287.797685486114	-0.21232335344088	0.256038046896189	-0.829264853465183	0.406954554189273	NA	0.396801982334693
LOC410803	5621.31656875536	0.159549578930985	0.129025838489727	1.23657075821823	0.216246481543964	0.417864807683084	0.293770767648887
LOC408656	1175.61155828506	-0.360466322108818	0.174527046742341	-2.06538945588751	0.0388861654357452	0.187046236116745	0.147988988600379
LOC410804	381.539214977934	-0.16842760571352	0.16321839728128	-1.03191557152263	0.302111670638383	NA	0.344757459551437
LOC408657	850.829681749864	-0.101553081315798	0.142671091948101	-0.711798584626656	0.476589509295838	0.662404497235124	0.429883624506119
LOC410805	78.0378750616972	1.22741151752824	0.772234745670433	1.58942798729243	0.111963800160275	NA	0.221942327902261
LOC410806	1758.5282231459	0.140224751429801	0.155980400305045	0.898989559941943	0.368658221569928	0.57168357073451	0.381149048763532
LOC100577216	302.62823954052	-0.175692906580911	0.192264395855919	-0.913808850561046	0.360817295040668	NA	0.376909548146016
LOC409422	1829.82750738789	-0.16060062817357	0.167082158779636	-0.961207524170105	0.336447833946115	0.538663899334082	0.363567667507237
LOC412045	3095.0475329832	-0.239538869411471	0.171965130424074	-1.39295023834633	0.163634838957657	0.361985044388077	0.261632897612969
LOC724402	3532.51767149786	-0.514142802505065	0.204440066686421	-2.51488277634775	0.0119071967288637	0.111339835231558	0.096275365006861
LOC724363	296.008203917811	0.0719033050926761	0.168859767334296	0.425816677517549	0.670241433482437	NA	0.501255576177593
LOC724270	254.775733192936	-0.13577787130573	0.20574232694953	-0.659941361210701	0.5092914602008	NA	0.444166278007774
LOC551485	1392.82877890311	-0.377495218631875	0.192097059956387	-1.96512751792027	0.0493994803941867	0.206283411355537	0.161584951805462
LOC726869	330.330447652117	0.0182166505245584	0.183038686625131	0.0995234988866955	0.920722631106312	NA	0.579337983222672
LOC413233	955.944366427277	-0.263250156668123	0.14342834008989	-1.83541241921323	0.0664446049607225	0.235247154811256	0.18012448988148
LOC727354	768.280682396022	-0.0675098697872867	0.145100754701682	-0.465262016907373	0.641743831789133	0.787711813418997	0.492814425830304
LOC551755	597.738287156489	0.0420349424332227	0.148992417516789	0.28212806486267	0.777845314302999	0.878845785767271	0.539509854450311
LOC113218664	726.179373273438	-0.483696599670554	0.184494672879662	-2.6217374849953	0.00874827878176781	0.105221679973506	0.0899861005491751
LOC410161	2543.07733745412	-0.507203469408021	0.25450348860925	-1.99291362244056	0.0462709063803406	0.201503411298327	0.157461426991978
LOC413372	12407.8176315994	-0.366556256679291	0.185530904336251	-1.97571535583611	0.0481870247416016	0.205326851254204	0.160182457358394
LOC102655050	95.7910803582055	-0.515059130406003	0.255495935543884	-2.01591907640165	0.0438084384853326	NA	0.153884452724397
LOC552667	415.719417741601	-0.149932143335308	0.150556612155409	-0.995852265728082	0.3193219311764	NA	0.35413016645903
LOC412506	1341.57434540254	-0.332640587399425	0.164353167579662	-2.02393779382558	0.0429765526420648	0.193773823023723	0.152634210184285
Ndufs1	5726.64469406404	0.0258228172114995	0.174152198206305	0.148277296970487	0.882123931683912	0.94121019167227	0.568915050907356
LOC552649	1489.25743950537	-0.109213721941791	0.146814101172751	-0.743891227541439	0.456942282964257	0.646478785477615	0.4210435751481
LOC409663	660.74415259174	-0.0640953195603885	0.277096217831996	-0.231310698001839	0.817073436228114	0.903650753974139	0.551287846822865
LOC100576775	151.69986578833	-0.0454373238385684	0.22823576437676	-0.199080647867102	0.842199658996577	NA	0.559019919228422
LOC552241	3038.68889845255	-0.056851546021337	0.170847248310684	-0.332762433012401	0.739313617754144	0.851485339068565	0.525433328869682
LOC552175	2058.53869083371	0.0900457513248379	0.15297396567777	0.588634483821343	0.556106496195251	0.726418293164796	0.462478479035943
LOC100576120	42.115614991405	0.432838479549582	0.361071000618023	1.19876278850619	0.230620195622521	NA	0.303027881218445
LOC727415	864.862937201569	-0.192959768395436	0.15337208439271	-1.25811531583128	0.208350055092996	0.409787389445023	0.289144208935198
LOC409242	11424.8495356189	-0.324947116548292	0.174752189881041	-1.85947378839426	0.0629600112355506	0.232365946526103	0.177813262510898
LOC551723	395.466640127937	0.476558868585026	0.203560664900128	2.34111471790897	0.0192262585055371	NA	0.113930901209639
LOC411536	2957.34110657757	-0.282904295676018	0.183562921728459	-1.54118431441461	0.12327193393928	0.314111934955606	0.230537262506226
LOC100576296	655.867406404898	-0.0989168248244663	0.142116270135816	-0.696027448017981	0.486411640483196	0.668989338922406	0.433221765617235
LOC551966	356.758223971357	0.178784259125245	0.192618960539175	0.928175806913276	0.353316381795246	NA	0.372348821632716
LOC412619	421.26586405667	-0.0434595107338983	0.152232695742031	-0.28548079321635	0.775275817230706	NA	0.538568864999838
LOC100576506	185.339072587075	0.156299562239757	0.186794470780104	0.836746192684438	0.402735248234936	NA	0.395910809588925
LOC552280	615.450035728357	-0.480471991702863	0.234381279505591	-2.04995890762428	0.0403684409402295	0.189043738499692	0.149030345458079
LOC113218654	87.1146191828893	-0.318213048135827	0.253632405530613	-1.2546229945267	0.209615651981661	NA	0.289744692826566
LOC409556	794.582248200672	-0.539294970876374	0.192417861073925	-2.80272822837991	0.00506723494184857	0.0866217878641988	0.0773804966001896
LOC551442	682.094386501076	0.229471506725244	0.181041242924206	1.26750956311824	0.204973146354302	0.406947142876259	0.287408361789514
LOC412432	472.199820730868	-0.478748630014102	0.199273383231369	-2.40247153057187	0.0162847020914783	NA	0.108003216200664
LOC102654682	341.381747104786	0.106865339540448	0.176450528222554	0.605639102455171	0.544754430671335	NA	0.458234134876026
LOC100576930	118.459562653627	0.338293331530187	0.208371881584171	1.62350759113117	0.104480941934419	NA	0.216646648866272
LOC552200	710.649487045959	0.08536952178364	0.152379794387904	0.560241744166683	0.575314557200457	0.74147100248275	0.469734733987913
LOC409492	745.661157501787	-0.0485421656089703	0.152000863664088	-0.319354538117924	0.749457680568278	0.858840129065046	0.529796130096186
LOC550978	398.111336572152	0.00562440041631187	0.165584319236486	0.0339669869843119	0.972903476072157	NA	0.591201546849642
LOC102654766	66.9917826816872	-0.237683738094516	0.948519255319894	-0.250583988423467	0.802135762217906	NA	0.547337190141898
LOC100577795	952.177145040182	0.641256013718685	0.185495792017772	3.45698415442894	0.000546256968359929	0.0359370872214972	0.0320215779713595
LOC550691	650.464045343707	-0.121257489607662	0.177556546960393	-0.682923224648595	0.494655357585139	0.676591195668528	0.436733771827584
LOC409402	152.018167775471	0.197132543039793	0.238235517048647	0.827469159434941	0.407971195386868	NA	0.397051790846337
LOC551465	117.302275465805	-0.16496326262613	0.266573867020369	-0.618827586027124	0.536029947117941	NA	0.454471620266382
LOC552029	668.491607438192	0.16963869276073	0.137532664613344	1.23344292963165	0.217410556719115	0.419181455272823	0.294425618918844
LOC412667	252.209282863433	-0.374105966982658	0.180545405682794	-2.07208799120559	0.0382572360424381	NA	0.146964140866825
LOC727126	85.1780405543326	0.08524661712338	0.246140716932834	0.346332854578635	0.729092580245945	NA	0.522170805517085
LOC724227	731.821652507132	0.420772542030439	0.173799188420313	2.42102708220277	0.0154767242064586	0.122694993147986	0.105799534263548
LOC100578349	511.816645700946	-0.119180055504669	0.246893483220636	-0.482718514680938	0.629295615266043	NA	0.488356604010962
LOC411858	472.143848185563	-0.191001980324061	0.147093212718395	-1.2985098142477	0.194112206085413	NA	0.281819858111032
Pten	440.75580650069	-0.118097654422549	0.196851759327902	-0.599931922507385	0.548551606617616	NA	0.460186216896337
LOC409900	758.358627568254	0.480992089309692	0.15227479212873	3.15871118643899	0.00158468448030445	0.063407597525975	0.0540060042104891
LOC413416	1769.07136874892	-0.133107249828574	0.153367805287807	-0.867895641975107	0.38545146493454	0.586004993258324	0.389210959712309
LOC102655950	138.137086723373	0.512185969561284	0.232644715450539	2.20158007272757	0.0276949848218279	NA	0.129822540804305
LOC409286	3482.12379620223	0.169654952447592	0.149674710136836	1.1334911040916	0.257008074872489	0.460601555981992	0.318619811691822
LOC411365	3998.74274794488	0.195770840822804	0.131609937545614	1.48750804440548	0.136880680172425	0.329027108753665	0.240600091740847
LOC552297	530.137898750866	0.0928281206984071	0.17317030219377	0.536051040637073	0.591923275639417	0.751720053473632	0.475462485518047
LOC724164	264.725422945224	0.416647033384616	0.174607211859056	2.38619601646773	0.0170236746809222	NA	0.10940662245725
LOC409703	2290.16578117322	0.313666676333974	0.176283045838718	1.77933547064389	0.0751847789534267	0.248571540553682	0.189672272767405
LOC724301	103.92640520869	-0.0777926060354558	0.251044851670179	-0.309875329121105	0.756655764495427	NA	0.53245159999604
LOC412979	123.052932022347	-0.209326393633182	0.244887909252668	-0.854784518647694	0.392670450290657	NA	0.392358031234703
LOC552234	974.265489757646	-0.228503831591631	0.165744468332399	-1.37865132930632	0.168002282454722	0.365979855985473	0.264417785236546
LOC412195	217.773373539779	-0.184853421912551	0.19398169041715	-0.952942628322454	0.340619139991238	NA	0.36635418045028
LOC552625	456.764737900867	-0.428762578230543	0.196528758741293	-2.18167855420569	0.0291332647746092	NA	0.132397149995421
LOC725740	516.069144040197	0.0392700346191033	0.166818710594513	0.235405455893716	0.813894051859008	0.901512238054034	0.55016402761608
LOC552599	182.394418889475	0.137636902205918	0.185134871604111	0.743441259949329	0.457214572090309	NA	0.4210435751481
LOC413484	608.334471859746	-0.154322750230433	0.186943559782683	-0.825504502053074	0.409085227786837	0.602117986118795	0.397538892850655
LOC100578734	383.822562095739	0.22545471830793	0.184467550728592	1.22219174818254	0.221635123659815	NA	0.296602885958409
LOC409932	4386.58669478798	0.521656556089368	0.194998564073881	2.67518152539689	0.00746887974606353	0.100631561858291	0.0878158320092103
LOC413486	508.137084144829	0.028775477413061	0.151551994932508	0.18987198041092	0.849409449429054	NA	0.561166518409311
LOC724985	173.470955984226	0.196166350042983	0.203883375496787	0.962149805323751	0.335974358804463	NA	0.36328282316088
LOC413488	1118.92068650483	-0.0776546152073563	0.135908074352506	-0.571376024399721	0.567744777636496	0.735451311131272	0.467138190051676
LOC413489	105.019332255185	-0.117844886226555	0.221937048840534	-0.53098338849783	0.595430290449677	NA	0.476874238031338
LOC102656299	27.5858843032493	-0.333359284910692	0.385468177832857	-0.864816615433401	0.387139450031124	NA	0.389904358162538
LOC107964011	302.243212854516	-0.256860547247738	0.192465646968189	-1.33457867050005	0.182014282829377	NA	0.27441366544959
LOC100577932	129.214142169839	0.153912053597305	0.266051119988203	0.578505565412126	0.562922841049448	NA	0.465236215516248
LOC724509	206.090750079154	-0.0797198068371578	0.183120284134266	-0.435341214186335	0.663314773513182	NA	0.499169052270762
LOC102653952	36.6064612075339	-0.14759475158863	0.326555606085438	-0.451974330981211	0.6512874746073	NA	0.495754993357826
LOC412708	501.389440531927	-0.508654421911873	0.192075041366093	-2.64820675447563	0.00809200189096269	NA	0.0883510087702989
LOC552139	204.416503995462	-0.114004618328799	0.215609046737106	-0.528756191143525	0.5969745916413	NA	0.476989878625817
LOC100577228	166.040891570828	-0.543088734523215	0.229343314147421	-2.36801642350961	0.017883742009638	NA	0.111360894556536
LOC113218630	283.315781340156	0.630170895223077	0.340961226126738	1.84821864462922	0.064570719276776	NA	0.178901701166833
LOC724602	291.436920892652	-0.432336727451479	0.197890906592079	-2.18472255697263	0.0289091952466259	NA	0.132151031220468
LOC100577147	158.508731137132	-0.0763392831907107	0.207401533747555	-0.368074824767832	0.712817442115084	NA	0.515556095971055
LOC552148	128.798853491645	-0.148607936391686	0.216547020882834	-0.686261744843362	0.492548067886341	NA	0.435839009478855
LOC409888	2012.45450221613	-0.589895635650126	0.247101090561216	-2.38726439575947	0.0169742788300177	0.127512662076015	0.109382956255365
LOC413394	577.001352404428	0.0241565299622767	0.184688144607904	0.130796321624009	0.895936432917562	0.949281598762336	0.572842864056599
LOC413393	208.488874663342	-0.157056871632871	0.191636711446377	-0.819555243082005	0.412469697187317	NA	0.399120369571683
LOC552022	462.068317667114	-0.429435593045333	0.215425468958735	-1.99343000213031	0.0462143813208024	NA	0.157461426991978
LOC413391	119.646152779532	0.36688120387218	0.244834549541381	1.49848624125727	0.134006964688057	NA	0.239289905825936
LOC100577538	49.7077705139124	0.151755179869359	0.284726230200607	0.532986299725313	0.594043064093729	NA	0.476331450030225
LOC413390	571.17097863696	-0.244703251347653	0.158511934135898	-1.54375285798898	0.122648215734509	0.313257972187786	0.230167386112407
LOC413389	1260.65960740519	0.209428290157918	0.153596323906702	1.36349806317715	0.172725594455643	0.37201117615397	0.267739849907825
LOC413388	413.445196779752	-0.340907480634526	0.206165154719488	-1.65356498336671	0.0982159323942766	NA	0.21030627564708
Cac	3924.27957260708	0.0385384432519087	0.198240048419644	0.194402914845585	0.845860407743393	0.920713434550467	0.560021515402845
LOC408763	5210.65137230614	-0.101144978768722	0.150119390299381	-0.673763586216343	0.500461628802205	0.68161994738368	0.439276472946874
LOC107964236	42.5212121322976	-0.318593649129351	0.313901528268564	-1.01494774774328	0.310130735921086	NA	0.348963268660426
LOC100577300	431.922769812382	-0.181291339151799	0.176866380420234	-1.02501865374895	0.305354386064404	NA	0.345783676043737
LOC551850	125.333306752577	-0.231647651820237	0.214905062455674	-1.07790691002459	0.281075301389277	NA	0.332827246788573
LOC107964189	1453.75190285319	0.161697134367187	0.149488049003462	1.08167265172778	0.279398009367143	0.485149942039947	0.331533679923639
LOC551057	301.485527968203	0.203327364998547	0.158467389732066	1.28308647818538	0.199461780526358	NA	0.284440344697041
LOC100578226	1425.53967804906	0.00713421597650979	0.133783151075911	0.0533267150544369	0.957471594945094	0.977307398028604	0.587417063791259
LOC102653875	216.426909421867	0.295913303947858	0.218431427972735	1.35471944991723	0.175506958619232	NA	0.269795123840587
LOC410972	354.055716107771	0.232619856209363	0.159312859343133	1.46014488201696	0.144250259772226	NA	0.246598694191448
LOC113218647	1175.28309825613	0.0216379401283033	0.163074780831118	0.132687224953021	0.894440746534935	0.948780812360574	0.572842864056599
Mir9881	46.0954744181703	-0.0717476554152104	0.304019793594698	-0.23599665852961	0.813435263061697	NA	0.549990291779687
LOC410973	53.2310868635369	0.152609877885966	0.27689695966185	0.551143205300394	0.581535509739949	NA	0.47222132373658
LOC408761	1511.79802711605	0.0928163591575824	0.156019040059411	0.594904052237719	0.551907608444534	0.723545542230122	0.461403483293298
LOC725829	2577.87073591887	-0.153531861269974	0.153313166746624	-1.0014264562398	0.31662067891963	0.520942397828357	0.352987319675838
LOC107965859	74.8020853256752	-0.265136848830755	0.2522780274603	-1.05097083364693	0.293271985612011	NA	0.339465689981746
LOC408762	326.074079695004	-0.533302792868481	0.191413826489187	-2.78612471549232	0.00533423443839952	NA	0.0783839016468783
LOC410970	660.401469913953	-0.330268414034144	0.190594755711947	-1.7328305430045	0.0831257924303922	0.260225083441069	0.196860764347375
LOC408759	1989.18059507642	0.230614809716722	0.162456349584478	1.41954937622675	0.155738912345746	0.352564315644019	0.255502694156075
LOC107964202	1914.6696093519	0.0290976240971204	0.138186601267079	0.210567622550339	0.833224679282429	0.914308759511777	0.556374052462486
LOC411564	872.545009823789	0.192647321085938	0.175657254689262	1.09672282779742	0.272762574294562	0.478519231348279	0.328484012309525
LOC411563	692.087852099645	0.192809126593464	0.166961685306616	1.15481061561747	0.248167988980057	0.451422458379308	0.313105129793584
LOC100577638	3480.30093803388	-0.0160335249939484	0.149499854889924	-0.107247762920933	0.914592424575602	0.960590174536832	0.577355960953954
LOC413448	606.916047708164	-0.161693315027636	0.175475652217584	-0.921457267627886	0.356811741618246	0.559103782788316	0.374584241162617
LOC552493	313.741111589826	0.146183751894628	0.195959497430943	0.745989624443408	0.455673682723813	NA	0.420552402210995
LOC412294	284.617547370954	-0.220857183620667	0.1745617636194	-1.26520939661337	0.205796274922171	NA	0.287896106480173
LOC412295	97.2449313070859	0.562540926468925	0.24386009707115	2.30681826680646	0.0210649534726046	NA	0.118994474615008
LOC102654919	395.465766727533	-0.288726313857794	0.156337340132645	-1.84681608125624	0.0647738003884395	NA	0.178937614946121
LOC724212	254.074008087803	-0.472085216992956	0.285617036387722	-1.65286084809068	0.0983591868847125	NA	0.210530330757094
Hsc70-3	11762.0768252663	-0.818237940951074	0.233148422471621	-3.50951523616107	0.000448924337635976	0.0332546430605532	0.0300420329904002
LOC413708	587.696077742418	0.0803574300868358	0.159072178689239	0.505163321134997	0.613444129864452	0.767158528764819	0.482650923531964
LOC102655746	49.1388379571009	0.278620763829508	0.29440975535501	0.946370691737226	0.343959548593936	NA	0.367244455503214
LOC411403	123.259886129856	0.125892635352584	0.270289009087912	0.465770457250214	0.641379813597227	NA	0.492814425830304
LOC551655	1236.72476928515	-0.0479989376385537	0.149375851970172	-0.321329967364057	0.747960348899465	0.85803007527648	0.529149339935348
LOC100577120	138.419283243876	-0.320742056609615	0.223272050335089	-1.43655265461235	0.150845144695214	NA	0.251793110815954
LOC411404	938.971928717533	0.115187664514135	0.13460505797382	0.855745439644165	0.392138600159858	0.591352835101809	0.392042169967309
LOC724489	223.170080093489	0.152377057309871	0.17985363020766	0.847228143985394	0.396867969290398	NA	0.394024560354452
LOC410076	492.365314463644	-0.000710162416465586	0.153176860923143	-0.00463622515950312	0.996300840776813	NA	0.597326790538104
LOC413810	302.099259595012	-0.18001755923088	0.192328930820616	-0.935987937242687	0.349279398509302	NA	0.370313535160457
LOC724510	2502.62199715704	0.011973274012448	0.134388806957324	0.0890942801229732	0.929006983119125	0.967525589231477	0.581406191883392
LOC413812	2172.18553869039	0.128436156731276	0.133068281712705	0.965189864017108	0.33444972284415	0.537660505987664	0.362991356473431
LOC551458	3037.76837892576	0.800546416026034	0.293901157417732	2.72386275392645	0.0064523313628131	0.0963457561780343	0.0845041481375604
LOC551430	696.490058419911	-0.486092303559831	0.172157130604239	-2.82353860019472	0.00474967062198922	0.0855403366609028	0.0768762627933912
LOC551396	381.351003466661	0.0133398127964337	0.167555239801565	0.0796144173839743	0.936543928202701	NA	0.582902016585994
LOC412464	512.808653681597	-0.233506618291565	0.184772871841226	-1.26374946692508	0.206319963996548	NA	0.288037413890102
LOC724809	427.572079221761	-0.140319982922481	0.165207883800608	-0.849354036226475	0.395684321165853	NA	0.393787428846122
LOC551291	9143.45846547926	-0.0882909543246052	0.154531189073417	-0.571347149103078	0.567764347054819	0.735451311131272	0.467138190051676
E74	1257.30253660597	-0.114607281145619	0.165873402024659	-0.690932239567748	0.48960812468069	0.672108276118734	0.434436290589607
LOC102654462	140.684118045822	0.302548167946745	0.237053858373864	1.27628451197613	0.201854963126914	NA	0.285755502153043
LOC725036	185.513517983144	0.56973196718347	0.265012056141595	2.1498341452023	0.031568336249753	NA	0.135832522782087
LOC724920	294.653744330111	-0.049243077904952	0.17890741024997	-0.275243366589172	0.783129271410409	NA	0.541383944791196
LOC551217	596.492079195244	0.0808860757033909	0.189366910137987	0.427139438693123	0.669277768745191	0.803254650041485	0.501072413426444
LOC410969	482.532650914866	0.0883156622554788	0.178754498182059	0.494061202116048	0.621262957153783	NA	0.485300735032711
LOC410968	444.531310293498	-0.272106913611066	0.156394865219463	-1.73987114749086	0.081881645982078	NA	0.195271573608561
LOC551083	132.599716905831	-0.0300746515635704	0.219732222806048	-0.136869555040712	0.891133903881445	NA	0.571413575851831
LOC100576467	780.713621954926	0.29829634661541	0.170071538128144	1.75394630929163	0.0794397074606758	0.253622948378128	0.192650445285554
LOC551043	176.721439401874	0.101530892662939	0.187431916037073	0.541694791418861	0.588028778478144	NA	0.473863525259599
LOC410967	425.021342118907	-0.13362296609356	0.173271503369207	-0.771176814971334	0.440602134733763	NA	0.413579353294092
LOC100578165	271.229911248115	0.109610543724072	0.194681886566631	0.563023841905071	0.573418649057644	NA	0.469311360761328
LOC411492	705.647363879213	-0.255029537239728	0.158393678350488	-1.61009921542075	0.107376198354055	0.292930601876756	0.218656555593578
LOC551948	99.5575548224414	-0.181741090528278	0.238749929881868	-0.761219450904977	0.446526002275442	NA	0.416476907851773
LOC551916	581.874928866471	-0.19833110315151	0.161550799465252	-1.22767020533482	0.219570795465075	0.420916730202807	0.295561757206294
LOC725432	1575.86913069552	0.0353752113787591	0.279903833793761	0.126383447126431	0.899428404363068	0.951588238729152	0.57365692912673
LOC413987	1512.43937427944	0.022099532587711	0.131425145983625	0.168153000115096	0.866462914840476	0.931925186088022	0.565098743980954
LOC413874	776.336345969114	-0.227843759563145	0.169284071712248	-1.34592556321801	0.178326523713939	0.377970152144945	0.271856530819456
LOC100577303	79.5592642241144	0.0109922115027679	0.246677881363456	0.04456099364082	0.964457234321625	NA	0.589119554138747
LOC725590	4352.38617782717	0.226339406923885	0.180059948953186	1.25702249856092	0.208745488814083	0.410189660860317	0.289469187907763
LOC100577278	35.3021260662943	0.197520645347795	0.341575115065595	0.578264155191352	0.563085790782942	NA	0.465236215516248
LOC408755	263.532284628166	0.0903304545404546	0.173562379182594	0.520449506199864	0.602750312627215	NA	0.479496454620185
LOC408754	214.963922727363	0.421913163598027	0.212097423617433	1.98924228499373	0.0466744666746796	NA	0.15826760764459
LOC107964015	80.4925280760458	0.0956210249877215	0.256226105847298	0.373190017744361	0.70900702509469	NA	0.51439443108977
LOC102654815	47.9667698143079	0.658589304947385	0.32419432738053	2.03146461651178	0.0422078853841663	NA	0.150887213646728
LOC107964204	403.598095378493	-0.0699718167910596	0.227498264427046	-0.307570771879441	0.758408963388439	NA	0.533013677632878
LOC100576853	487.535951167333	0.102049392737791	0.173674898660882	0.58758861254356	0.556808456317605	NA	0.462803760675512
LOC410965	373.16187635648	0.0939970868762732	0.170858422532775	0.550146053573929	0.582219201249132	NA	0.47247106045401
LOC100576737	39.109468886174	0.0709105916705433	0.312543437466937	0.226882356722159	0.820515221629235	NA	0.552789080931499
LOC410964	409.057114625017	-0.0173428626609756	0.17782015839212	-0.0975303521141402	0.9223052316195	NA	0.579473743598822
LOC102654314	60.9306605396402	0.0620003518042079	0.316705494932642	0.195766580612674	0.84479286870644	NA	0.559805846307552
LOC102656822	180.992262048319	0.0159415763835515	0.199608980305514	0.0798640239489825	0.936345403128333	NA	0.582902016585994
LOC725894	202.030429323345	0.119075133779902	0.210760623375975	0.564978086857735	0.572088669063265	NA	0.468885706801343
LOC726496	137.713443017172	-0.23181302618127	0.202931543423819	-1.14232130831003	0.253320487261505	NA	0.316239278631157
LOC725931	126.459900288794	0.163062494402187	0.231868048668289	0.703255559956279	0.48189650010292	NA	0.431810555781739
LOC412459	951.210354811297	-0.315121508460218	0.154761175948683	-2.03617933586075	0.0417323504692181	0.190629859745479	0.15031419454564
LOC409498	1252.8194512549	0.388092676376901	0.149770472941461	2.59124958848592	0.00956281084086846	0.106491538304407	0.0917123945390962
LOC552601	209.692821779405	0.182341438297459	0.185141890240763	0.984874023163194	0.324685954628343	NA	0.357302609328587
LOC413376	567.314040883003	-0.506672674431659	0.161892885486504	-3.12967844701178	0.00174997746953399	0.0636826093071519	0.0542085384496852
LOC413498	1368.61478489629	-0.259623974111506	0.153296869995134	-1.6936025772721	0.0903408279903535	0.269735545197179	0.203850834075362
LOC413948	82.8722326334079	-0.1797339402375	0.259784796465473	-0.691857039683951	0.489027111769785	NA	0.434062045763937
LOC552647	1331.92963863559	-0.486093467895924	0.187734337599976	-2.58926243387446	0.00961817627885688	0.106491538304407	0.0917123945390962
LOC414029	2181.38991217969	-0.43094260085756	0.21600144105126	-1.995091323281	0.0460329205243206	0.201081429493562	0.157142008949734
LOC107964212	27.4433015342086	-0.0982799500990119	0.38758944324939	-0.253567148978758	0.799829978603683	NA	0.546799521816414
LOC726232	66.6466170744187	0.563600882123678	0.24948168791795	2.25908717720812	0.0238779626167327	NA	0.123367169118826
LOC411411	2401.91367478712	0.256378520326655	0.159255351593291	1.60985811629991	0.107428834398343	0.292930601876756	0.218656555593578
LOC411412	1236.82790433072	0.0283994260860839	0.147742409909071	0.192222572405327	0.847567865368795	0.920955873731559	0.560350598262374
LOC409130	2935.01205207245	0.386489915205791	0.189220642020445	2.04253569314087	0.0410984226063757	0.190244510615014	0.150026284845763
LOC726129	233.191949286461	-0.0617795720595266	0.169040549985776	-0.365471906384148	0.714759174046553	NA	0.516177417911034
LOC409131	2254.3122352257	0.123273267999272	0.169855647011543	0.725753133134837	0.467990122732325	0.656205744118489	0.425919721853312
Nmdar1	1260.53953734317	0.146101941821043	0.193584785954006	0.754718099880819	0.450418143972629	0.640378382818977	0.418170113144543
LOC409132	606.032371098711	0.130504400715497	0.149222009342994	0.874565362643838	0.38181044120331	0.583328971043198	0.387688648066703
LOC726071	128.074958120818	-0.0209906356123172	0.197453091395911	-0.106306948470253	0.915338818751118	NA	0.577425962204186
LOC412342	263.732891118632	0.0367228531469128	0.178506484686709	0.205722796073005	0.837007450727632	NA	0.557433023889814
LOC412341	278.081508068896	0.216535174530461	0.172089209876338	1.25827281493164	0.208293109161859	NA	0.289144208935198
LOC409443	673.301879713049	0.0721836791434832	0.139498221198474	0.51745232679908	0.604840439969949	0.761669433322943	0.479836600578666
LOC551616	92.4499368046755	-0.294110240256976	0.254621347763482	-1.15508869480251	0.248054107278178	NA	0.313096125357456
LOC410961	220.510454902014	-0.275270709827213	0.188472588007285	-1.46053446147072	0.144143243541744	NA	0.246570385871953
uzip	5726.5585990964	-0.165459886379981	0.149366357262917	-1.10774534113285	0.267971811744842	0.474137574000042	0.326091731174403
LOC102655496	76.8422484374431	0.400261103616384	0.33930448945137	1.1796516582011	0.238138788058918	NA	0.308813387668683
LOC551539	46.5505159915019	0.236485501375663	0.286813763327716	0.82452633594662	0.409640557998309	NA	0.397658215824074
LOC724128	382.282355767033	0.240259211648032	0.201641539021039	1.19151645446906	0.233450900964528	NA	0.305349021017956
LOC412160	456.534944292429	0.175957377309093	0.153811166842187	1.14398311203001	0.252630640792183	NA	0.315956898836179
[truncated: 7,115 more rows]

## Sheet: Table_S3
Protein domain analysis
XP_006563820.2	8cd6daa728af9e9ffdfe3a2f9e67fef2	2053	Pfam	PF16687	beta-propeller of ELYS nucleoporin	59	356	0.0024	T	2025-03-10	IPR032040	ELYS, beta-propeller domain
XP_001120757.4	3fc9e4a81f4f376d0d45fca96710cd91	587	Pfam	PF00002	7 transmembrane receptor (Secretin family)	276	525	2.3E-15	T	2025-03-10	IPR000832	GPCR, family 2, secretin-like
XP_026298015.1	aa225d09235431dc0b7ca935d935058b	3564	Pfam	PF00008	EGF-like domain	2055	2084	1.5E-4	T	2025-03-10	IPR000742	EGF-like domain
XP_026298015.1	aa225d09235431dc0b7ca935d935058b	3564	Pfam	PF00008	EGF-like domain	2479	2509	3.2E-4	T	2025-03-10	IPR000742	EGF-like domain
XP_026298015.1	aa225d09235431dc0b7ca935d935058b	3564	Pfam	PF00008	EGF-like domain	2365	2394	3.4E-5	T	2025-03-10	IPR000742	EGF-like domain
XP_026298015.1	aa225d09235431dc0b7ca935d935058b	3564	Pfam	PF00008	EGF-like domain	2287	2316	6.1E-4	T	2025-03-10	IPR000742	EGF-like domain
XP_026298015.1	aa225d09235431dc0b7ca935d935058b	3564	Pfam	PF00008	EGF-like domain	2174	2204	0.12	T	2025-03-10	IPR000742	EGF-like domain
XP_026298015.1	aa225d09235431dc0b7ca935d935058b	3564	Pfam	PF00008	EGF-like domain	2403	2432	0.36	T	2025-03-10	IPR000742	EGF-like domain
XP_026298015.1	aa225d09235431dc0b7ca935d935058b	3564	Pfam	PF00008	EGF-like domain	2135	2164	0.0031	T	2025-03-10	IPR000742	EGF-like domain
XP_026298015.1	aa225d09235431dc0b7ca935d935058b	3564	Pfam	PF00008	EGF-like domain	2017	2047	22	T	2025-03-10	IPR000742	EGF-like domain
XP_026298015.1	aa225d09235431dc0b7ca935d935058b	3564	Pfam	PF00008	EGF-like domain	2249	2278	0.0037	T	2025-03-10	IPR000742	EGF-like domain
NP_001229927.1	7d158a9924eea484fa4ecf5b5498dc56	424	Pfam	PF00008	EGF-like domain	288	321	0.05	T	2025-03-10	IPR000742	EGF-like domain
XP_026298016.1	ddfd0987f0b0218187bdc8653b4179a6	3543	Pfam	PF00008	EGF-like domain	2249	2278	0.0036	T	2025-03-10	IPR000742	EGF-like domain
XP_026298016.1	ddfd0987f0b0218187bdc8653b4179a6	3543	Pfam	PF00008	EGF-like domain	2365	2394	3.3E-5	T	2025-03-10	IPR000742	EGF-like domain
XP_026298016.1	ddfd0987f0b0218187bdc8653b4179a6	3543	Pfam	PF00008	EGF-like domain	2017	2047	21	T	2025-03-10	IPR000742	EGF-like domain
XP_026298016.1	ddfd0987f0b0218187bdc8653b4179a6	3543	Pfam	PF00008	EGF-like domain	2479	2509	3.2E-4	T	2025-03-10	IPR000742	EGF-like domain
XP_026298016.1	ddfd0987f0b0218187bdc8653b4179a6	3543	Pfam	PF00008	EGF-like domain	2287	2316	6.1E-4	T	2025-03-10	IPR000742	EGF-like domain
XP_026298016.1	ddfd0987f0b0218187bdc8653b4179a6	3543	Pfam	PF00008	EGF-like domain	2174	2204	0.12	T	2025-03-10	IPR000742	EGF-like domain
XP_026298016.1	ddfd0987f0b0218187bdc8653b4179a6	3543	Pfam	PF00008	EGF-like domain	2403	2432	0.36	T	2025-03-10	IPR000742	EGF-like domain
XP_026298016.1	ddfd0987f0b0218187bdc8653b4179a6	3543	Pfam	PF00008	EGF-like domain	2135	2164	0.0031	T	2025-03-10	IPR000742	EGF-like domain
XP_026298016.1	ddfd0987f0b0218187bdc8653b4179a6	3543	Pfam	PF00008	EGF-like domain	2055	2084	1.4E-4	T	2025-03-10	IPR000742	EGF-like domain
XP_001121958.1	28e5cd061366caea9ca428fadd274ff8	400	Pfam	PF00010	Helix-loop-helix DNA-binding domain	69	122	2.1E-10	T	2025-03-10	IPR011598	Myc-type, basic helix-loop-helix (bHLH) domain
XP_026300266.1	28e5cd061366caea9ca428fadd274ff8	400	Pfam	PF00010	Helix-loop-helix DNA-binding domain	69	122	2.1E-10	T	2025-03-10	IPR011598	Myc-type, basic helix-loop-helix (bHLH) domain
XP_026300349.1	aca285b83f93dbb993764852b5e3af87	350	Pfam	PF00010	Helix-loop-helix DNA-binding domain	277	328	1.9E-9	T	2025-03-10	IPR011598	Myc-type, basic helix-loop-helix (bHLH) domain
XP_006566912.2	a5cfadf81f36b5a43d49028ccf081f1c	468	Pfam	PF00010	Helix-loop-helix DNA-binding domain	137	190	2.6E-10	T	2025-03-10	IPR011598	Myc-type, basic helix-loop-helix (bHLH) domain
XP_016771986.2	59ca23d280dbcdbc1bf4f445624f5891	420	Pfam	PF00010	Helix-loop-helix DNA-binding domain	277	328	2.5E-9	T	2025-03-10	IPR011598	Myc-type, basic helix-loop-helix (bHLH) domain
XP_016771988.2	59ca23d280dbcdbc1bf4f445624f5891	420	Pfam	PF00010	Helix-loop-helix DNA-binding domain	277	328	2.5E-9	T	2025-03-10	IPR011598	Myc-type, basic helix-loop-helix (bHLH) domain
XP_016771007.1	d65771410c4500914dbda54b33805996	420	Pfam	PF00010	Helix-loop-helix DNA-binding domain	89	142	2.3E-10	T	2025-03-10	IPR011598	Myc-type, basic helix-loop-helix (bHLH) domain
XP_026295375.1	9227d9a532cf152827519e3575e3ffa4	514	Pfam	PF00010	Helix-loop-helix DNA-binding domain	423	474	6.7E-13	T	2025-03-10	IPR011598	Myc-type, basic helix-loop-helix (bHLH) domain
XP_016771992.2	98f6136829f593773d735352c38b9d8c	399	Pfam	PF00010	Helix-loop-helix DNA-binding domain	277	328	2.3E-9	T	2025-03-10	IPR011598	Myc-type, basic helix-loop-helix (bHLH) domain
XP_026300348.1	9bd6f45ca840305d3a031e423bf742eb	390	Pfam	PF00010	Helix-loop-helix DNA-binding domain	247	298	2.3E-9	T	2025-03-10	IPR011598	Myc-type, basic helix-loop-helix (bHLH) domain
XP_006566914.1	96496ef0cd1a147e22923885b594edcc	374	Pfam	PF00010	Helix-loop-helix DNA-binding domain	43	96	1.9E-10	T	2025-03-10	IPR011598	Myc-type, basic helix-loop-helix (bHLH) domain
XP_026300267.1	6d25fc87a7ca5ae234e5522e141e4ae7	366	Pfam	PF00010	Helix-loop-helix DNA-binding domain	35	88	1.9E-10	T	2025-03-10	IPR011598	Myc-type, basic helix-loop-helix (bHLH) domain
XP_026294937.1	331910eab878896734fa8bc7eb78cc98	489	Pfam	PF00011	Hsp20/alpha crystallin family	353	450	1.8E-22	T	2025-03-10	IPR002068	Alpha crystallin/Hsp20 domain
XP_026294937.1	331910eab878896734fa8bc7eb78cc98	489	Pfam	PF00011	Hsp20/alpha crystallin family	70	166	1.3E-21	T	2025-03-10	IPR002068	Alpha crystallin/Hsp20 domain
NP_001153524.1	18280eb1c7266c1e2d14c1692c1e51fb	658	Pfam	PF00012	Hsp70 protein	33	638	1.3E-262	T	2025-03-10	IPR013126	Heat shock protein 70 family
XP_624153.3	07166a45c088d5566fe43adc42e94e5f	951	Pfam	PF00012	Hsp70 protein	30	646	7.4E-87	T	2025-03-10	IPR013126	Heat shock protein 70 family
XP_006564557.1	9c9662b8537851b9b4cd84ffe7ef439a	936	Pfam	PF00012	Hsp70 protein	30	630	4.8E-87	T	2025-03-10	IPR013126	Heat shock protein 70 family
XP_006558861.1	956f332a4098e9121c41a04685cafb71	4234	Pfam	PF00018	SH3 domain	900	931	0.13	T	2025-03-10	IPR001452	SH3 domain
XP_006558862.1	8eac1ac5ed62e7fe682237cbe701ef08	4209	Pfam	PF00018	SH3 domain	900	931	0.13	T	2025-03-10	IPR001452	SH3 domain
XP_026301545.1	5c4ef10545bd1864e3e2fe52bb957d7d	458	Pfam	PF00023	Ankyrin repeat	287	316	0.63	T	2025-03-10	IPR002110	Ankyrin repeat
XP_006557342.1	4b623da35dc8b86e93181bc470f71b67	418	Pfam	PF00023	Ankyrin repeat	247	276	0.56	T	2025-03-10	IPR002110	Ankyrin repeat
XP_006557342.1	4b623da35dc8b86e93181bc470f71b67	418	Pfam	PF00023	Ankyrin repeat	80	106	3.6	T	2025-03-10	IPR002110	Ankyrin repeat
XP_397331.2	0543ffb435093bda85e64f8c5b3bbf09	469	Pfam	PF00023	Ankyrin repeat	298	327	0.65	T	2025-03-10	IPR002110	Ankyrin repeat
XP_026298636.1	735983f0a1785167606243efdaa39286	1393	Pfam	PF00024	PAN domain	245	306	5.0E-5	T	2025-03-10	IPR003609	PAN/Apple domain
XP_026298636.1	735983f0a1785167606243efdaa39286	1393	Pfam	PF00024	PAN domain	155	232	1.1E-8	T	2025-03-10	IPR003609	PAN/Apple domain
XP_026298636.1	735983f0a1785167606243efdaa39286	1393	Pfam	PF00024	PAN domain	352	424	5.7E-7	T	2025-03-10	IPR003609	PAN/Apple domain
XP_026298636.1	735983f0a1785167606243efdaa39286	1393	Pfam	PF00024	PAN domain	814	892	0.0031	T	2025-03-10	IPR003609	PAN/Apple domain
XP_026298635.1	344eac4976ac55b8dbbc507e70ac8d52	1394	Pfam	PF00024	PAN domain	245	306	5.0E-5	T	2025-03-10	IPR003609	PAN/Apple domain
XP_026298635.1	344eac4976ac55b8dbbc507e70ac8d52	1394	Pfam	PF00024	PAN domain	155	232	1.1E-8	T	2025-03-10	IPR003609	PAN/Apple domain
XP_026298635.1	344eac4976ac55b8dbbc507e70ac8d52	1394	Pfam	PF00024	PAN domain	356	428	5.7E-7	T	2025-03-10	IPR003609	PAN/Apple domain
XP_026298635.1	344eac4976ac55b8dbbc507e70ac8d52	1394	Pfam	PF00024	PAN domain	818	896	0.0031	T	2025-03-10	IPR003609	PAN/Apple domain
XP_026298637.1	3432d2ee24f1802278e4e3db227ee373	1390	Pfam	PF00024	PAN domain	245	306	4.9E-5	T	2025-03-10	IPR003609	PAN/Apple domain
XP_026298637.1	3432d2ee24f1802278e4e3db227ee373	1390	Pfam	PF00024	PAN domain	155	232	1.1E-8	T	2025-03-10	IPR003609	PAN/Apple domain
XP_026298637.1	3432d2ee24f1802278e4e3db227ee373	1390	Pfam	PF00024	PAN domain	814	892	0.0031	T	2025-03-10	IPR003609	PAN/Apple domain
XP_026298637.1	3432d2ee24f1802278e4e3db227ee373	1390	Pfam	PF00024	PAN domain	352	424	5.7E-7	T	2025-03-10	IPR003609	PAN/Apple domain
XP_026298633.1	4fb57a249a4fd716adf780a97705dc92	1397	Pfam	PF00024	PAN domain	245	306	5.0E-5	T	2025-03-10	IPR003609	PAN/Apple domain
XP_026298633.1	4fb57a249a4fd716adf780a97705dc92	1397	Pfam	PF00024	PAN domain	155	232	1.1E-8	T	2025-03-10	IPR003609	PAN/Apple domain
XP_026298633.1	4fb57a249a4fd716adf780a97705dc92	1397	Pfam	PF00024	PAN domain	356	428	5.8E-7	T	2025-03-10	IPR003609	PAN/Apple domain
XP_026298633.1	4fb57a249a4fd716adf780a97705dc92	1397	Pfam	PF00024	PAN domain	818	896	0.0031	T	2025-03-10	IPR003609	PAN/Apple domain
XP_026298634.1	4fb57a249a4fd716adf780a97705dc92	1397	Pfam	PF00024	PAN domain	245	306	5.0E-5	T	2025-03-10	IPR003609	PAN/Apple domain
XP_026298634.1	4fb57a249a4fd716adf780a97705dc92	1397	Pfam	PF00024	PAN domain	155	232	1.1E-8	T	2025-03-10	IPR003609	PAN/Apple domain
XP_026298634.1	4fb57a249a4fd716adf780a97705dc92	1397	Pfam	PF00024	PAN domain	356	428	5.8E-7	T	2025-03-10	IPR003609	PAN/Apple domain
XP_026298634.1	4fb57a249a4fd716adf780a97705dc92	1397	Pfam	PF00024	PAN domain	818	896	0.0031	T	2025-03-10	IPR003609	PAN/Apple domain
XP_026298631.1	4fb57a249a4fd716adf780a97705dc92	1397	Pfam	PF00024	PAN domain	245	306	5.0E-5	T	2025-03-10	IPR003609	PAN/Apple domain
XP_026298631.1	4fb57a249a4fd716adf780a97705dc92	1397	Pfam	PF00024	PAN domain	155	232	1.1E-8	T	2025-03-10	IPR003609	PAN/Apple domain
XP_026298631.1	4fb57a249a4fd716adf780a97705dc92	1397	Pfam	PF00024	PAN domain	356	428	5.8E-7	T	2025-03-10	IPR003609	PAN/Apple domain
XP_026298631.1	4fb57a249a4fd716adf780a97705dc92	1397	Pfam	PF00024	PAN domain	818	896	0.0031	T	2025-03-10	IPR003609	PAN/Apple domain
XP_016772146.2	ba0d1bd30ddad3ecbb73a9e22d1477b7	1584	Pfam	PF00028	Cadherin domain	710	796	2.0E-12	T	2025-03-10	IPR002126	Cadherin-like
XP_016772146.2	ba0d1bd30ddad3ecbb73a9e22d1477b7	1584	Pfam	PF00028	Cadherin domain	610	696	5.3E-14	T	2025-03-10	IPR002126	Cadherin-like
XP_016772146.2	ba0d1bd30ddad3ecbb73a9e22d1477b7	1584	Pfam	PF00028	Cadherin domain	811	898	1.2E-11	T	2025-03-10	IPR002126	Cadherin-like
XP_016772146.2	ba0d1bd30ddad3ecbb73a9e22d1477b7	1584	Pfam	PF00028	Cadherin domain	304	380	7.3E-4	T	2025-03-10	IPR002126	Cadherin-like
XP_016772146.2	ba0d1bd30ddad3ecbb73a9e22d1477b7	1584	Pfam	PF00028	Cadherin domain	144	258	2.0E-6	T	2025-03-10	IPR002126	Cadherin-like
XP_016772146.2	ba0d1bd30ddad3ecbb73a9e22d1477b7	1584	Pfam	PF00028	Cadherin domain	516	594	1.6E-8	T	2025-03-10	IPR002126	Cadherin-like
XP_016772146.2	ba0d1bd30ddad3ecbb73a9e22d1477b7	1584	Pfam	PF00028	Cadherin domain	914	1004	1.3E-12	T	2025-03-10	IPR002126	Cadherin-like
XP_016772146.2	ba0d1bd30ddad3ecbb73a9e22d1477b7	1584	Pfam	PF00028	Cadherin domain	1145	1220	3.0E-4	T	2025-03-10	IPR002126	Cadherin-like
XP_006563689.2	2bf55f1fde9fcac5529fff67d9c8cd0e	1375	Pfam	PF00028	Cadherin domain	307	385	1.3E-8	T	2025-03-10	IPR002126	Cadherin-like
XP_006563689.2	2bf55f1fde9fcac5529fff67d9c8cd0e	1375	Pfam	PF00028	Cadherin domain	602	689	1.0E-11	T	2025-03-10	IPR002126	Cadherin-like
XP_006563689.2	2bf55f1fde9fcac5529fff67d9c8cd0e	1375	Pfam	PF00028	Cadherin domain	705	795	1.1E-12	T	2025-03-10	IPR002126	Cadherin-like
XP_006563689.2	2bf55f1fde9fcac5529fff67d9c8cd0e	1375	Pfam	PF00028	Cadherin domain	401	487	4.5E-14	T	2025-03-10	IPR002126	Cadherin-like
XP_006563689.2	2bf55f1fde9fcac5529fff67d9c8cd0e	1375	Pfam	PF00028	Cadherin domain	501	587	1.7E-12	T	2025-03-10	IPR002126	Cadherin-like
XP_006563689.2	2bf55f1fde9fcac5529fff67d9c8cd0e	1375	Pfam	PF00028	Cadherin domain	95	171	6.1E-4	T	2025-03-10	IPR002126	Cadherin-like
XP_006563689.2	2bf55f1fde9fcac5529fff67d9c8cd0e	1375	Pfam	PF00028	Cadherin domain	936	1011	2.5E-4	T	2025-03-10	IPR002126	Cadherin-like
XP_006563686.2	2bf55f1fde9fcac5529fff67d9c8cd0e	1375	Pfam	PF00028	Cadherin domain	307	385	1.3E-8	T	2025-03-10	IPR002126	Cadherin-like
XP_006563686.2	2bf55f1fde9fcac5529fff67d9c8cd0e	1375	Pfam	PF00028	Cadherin domain	602	689	1.0E-11	T	2025-03-10	IPR002126	Cadherin-like
XP_006563686.2	2bf55f1fde9fcac5529fff67d9c8cd0e	1375	Pfam	PF00028	Cadherin domain	705	795	1.1E-12	T	2025-03-10	IPR002126	Cadherin-like
XP_006563686.2	2bf55f1fde9fcac5529fff67d9c8cd0e	1375	Pfam	PF00028	Cadherin domain	401	487	4.5E-14	T	2025-03-10	IPR002126	Cadherin-like
XP_006563686.2	2bf55f1fde9fcac5529fff67d9c8cd0e	1375	Pfam	PF00028	Cadherin domain	501	587	1.7E-12	T	2025-03-10	IPR002126	Cadherin-like
XP_006563686.2	2bf55f1fde9fcac5529fff67d9c8cd0e	1375	Pfam	PF00028	Cadherin domain	95	171	6.1E-4	T	2025-03-10	IPR002126	Cadherin-like
XP_006563686.2	2bf55f1fde9fcac5529fff67d9c8cd0e	1375	Pfam	PF00028	Cadherin domain	936	1011	2.5E-4	T	2025-03-10	IPR002126	Cadherin-like
XP_006563690.2	db08038d0194be2461d98eb6013aae21	1354	Pfam	PF00028	Cadherin domain	73	150	6.0E-4	T	2025-03-10	IPR002126	Cadherin-like
XP_006563690.2	db08038d0194be2461d98eb6013aae21	1354	Pfam	PF00028	Cadherin domain	480	566	1.7E-12	T	2025-03-10	IPR002126	Cadherin-like
XP_006563690.2	db08038d0194be2461d98eb6013aae21	1354	Pfam	PF00028	Cadherin domain	581	668	1.0E-11	T	2025-03-10	IPR002126	Cadherin-like
XP_006563690.2	db08038d0194be2461d98eb6013aae21	1354	Pfam	PF00028	Cadherin domain	380	466	4.4E-14	T	2025-03-10	IPR002126	Cadherin-like
XP_006563690.2	db08038d0194be2461d98eb6013aae21	1354	Pfam	PF00028	Cadherin domain	684	774	1.0E-12	T	2025-03-10	IPR002126	Cadherin-like
XP_006563690.2	db08038d0194be2461d98eb6013aae21	1354	Pfam	PF00028	Cadherin domain	915	990	2.5E-4	T	2025-03-10	IPR002126	Cadherin-like
XP_006563690.2	db08038d0194be2461d98eb6013aae21	1354	Pfam	PF00028	Cadherin domain	286	364	1.3E-8	T	2025-03-10	IPR002126	Cadherin-like
XP_026301491.1	77c43cc87cd8a194a562ac905fd877d9	1567	Pfam	PF00043	Glutathione S-transferase, C-terminal domain	109	163	22	T	2025-03-10	IPR004046	Glutathione S-transferase, C-terminal
XP_006561680.1	e288938675bb0b6e7e3611c50e2ddc86	1132	Pfam	PF00043	Glutathione S-transferase, C-terminal domain	1036	1111	1.6E-7	T	2025-03-10	IPR004046	Glutathione S-transferase, C-terminal
XP_395392.3	a90211be51ac6beffa34e00db0ee06e3	1194	Pfam	PF00043	Glutathione S-transferase, C-terminal domain	1098	1173	1.7E-7	T	2025-03-10	IPR004046	Glutathione S-transferase, C-terminal
XP_026300705.1	b05b64ec71bed4022c047d1571c2de1b	562	Pfam	PF00045	Hemopexin	474	503	3.4E-7	T	2025-03-10	IPR018487	Hemopexin-like repeats
XP_026300705.1	b05b64ec71bed4022c047d1571c2de1b	562	Pfam	PF00045	Hemopexin	379	420	1.2E-8	T	2025-03-10	IPR018487	Hemopexin-like repeats
XP_026300705.1	b05b64ec71bed4022c047d1571c2de1b	562	Pfam	PF00045	Hemopexin	426	470	1.9E-6	T	2025-03-10	IPR018487	Hemopexin-like repeats
XP_026300724.1	a00ff16d7a1ae47f8664d1e51177966b	539	Pfam	PF00045	Hemopexin	403	447	1.8E-6	T	2025-03-10	IPR018487	Hemopexin-like repeats
XP_026300724.1	a00ff16d7a1ae47f8664d1e51177966b	539	Pfam	PF00045	Hemopexin	356	397	1.1E-8	T	2025-03-10	IPR018487	Hemopexin-like repeats
XP_026300724.1	a00ff16d7a1ae47f8664d1e51177966b	539	Pfam	PF00045	Hemopexin	451	480	3.2E-7	T	2025-03-10	IPR018487	Hemopexin-like repeats
XP_026300672.1	f4a5dcc4bd9743188399f48db360f205	607	Pfam	PF00045	Hemopexin	519	548	3.8E-7	T	2025-03-10	IPR018487	Hemopexin-like repeats
XP_026300672.1	f4a5dcc4bd9743188399f48db360f205	607	Pfam	PF00045	Hemopexin	424	465	1.3E-8	T	2025-03-10	IPR018487	Hemopexin-like repeats
XP_026300672.1	f4a5dcc4bd9743188399f48db360f205	607	Pfam	PF00045	Hemopexin	471	515	2.1E-6	T	2025-03-10	IPR018487	Hemopexin-like repeats
XP_026300596.1	d88a67b01d7bf161dfc35bd13695d898	642	Pfam	PF00045	Hemopexin	506	550	2.3E-6	T	2025-03-10	IPR018487	Hemopexin-like repeats
XP_026300596.1	d88a67b01d7bf161dfc35bd13695d898	642	Pfam	PF00045	Hemopexin	459	500	1.4E-8	T	2025-03-10	IPR018487	Hemopexin-like repeats
XP_026300596.1	d88a67b01d7bf161dfc35bd13695d898	642	Pfam	PF00045	Hemopexin	554	583	4.0E-7	T	2025-03-10	IPR018487	Hemopexin-like repeats
XP_026300652.1	d88a67b01d7bf161dfc35bd13695d898	642	Pfam	PF00045	Hemopexin	506	550	2.3E-6	T	2025-03-10	IPR018487	Hemopexin-like repeats
XP_026300652.1	d88a67b01d7bf161dfc35bd13695d898	642	Pfam	PF00045	Hemopexin	459	500	1.4E-8	T	2025-03-10	IPR018487	Hemopexin-like repeats
XP_026300652.1	d88a67b01d7bf161dfc35bd13695d898	642	Pfam	PF00045	Hemopexin	554	583	4.0E-7	T	2025-03-10	IPR018487	Hemopexin-like repeats
XP_006563337.2	d88a67b01d7bf161dfc35bd13695d898	642	Pfam	PF00045	Hemopexin	506	550	2.3E-6	T	2025-03-10	IPR018487	Hemopexin-like repeats
XP_006563337.2	d88a67b01d7bf161dfc35bd13695d898	642	Pfam	PF00045	Hemopexin	459	500	1.4E-8	T	2025-03-10	IPR018487	Hemopexin-like repeats
XP_006563337.2	d88a67b01d7bf161dfc35bd13695d898	642	Pfam	PF00045	Hemopexin	554	583	4.0E-7	T	2025-03-10	IPR018487	Hemopexin-like repeats
XP_026300635.1	d88a67b01d7bf161dfc35bd13695d898	642	Pfam	PF00045	Hemopexin	506	550	2.3E-6	T	2025-03-10	IPR018487	Hemopexin-like repeats
XP_026300635.1	d88a67b01d7bf161dfc35bd13695d898	642	Pfam	PF00045	Hemopexin	459	500	1.4E-8	T	2025-03-10	IPR018487	Hemopexin-like repeats
XP_026300635.1	d88a67b01d7bf161dfc35bd13695d898	642	Pfam	PF00045	Hemopexin	554	583	4.0E-7	T	2025-03-10	IPR018487	Hemopexin-like repeats
XP_026299236.1	23c4db6f941a52d89062664f7af3e353	460	Pfam	PF00046	Homeodomain	342	398	1.6E-16	T	2025-03-10	IPR001356	Homeodomain
XP_394662.6	d1d93571eb821c18f1d46a5ef8d69b4a	335	Pfam	PF00056	lactate/malate dehydrogenase, NAD binding domain	25	163	1.5E-44	T	2025-03-10	IPR001236	Lactate/malate dehydrogenase, N-terminal
XP_006569462.1	c09f9c0cef356fd8676c29d95314df8c	332	Pfam	PF00056	lactate/malate dehydrogenase, NAD binding domain	22	160	1.4E-44	T	2025-03-10	IPR001236	Lactate/malate dehydrogenase, N-terminal
XP_391915.1	b2e66d15cc53fa13dd9eff3d530603dc	532	Pfam	PF00057	Low-density lipoprotein receptor domain class A	115	149	3.7E-5	T	2025-03-10	IPR002172	Low-density lipoprotein (LDL) receptor class A repeat
XP_026298015.1	aa225d09235431dc0b7ca935d935058b	3564	Pfam	PF00057	Low-density lipoprotein receptor domain class A	162	197	4.9E-4	T	2025-03-10	IPR002172	Low-density lipoprotein (LDL) receptor class A repeat
XP_026298016.1	ddfd0987f0b0218187bdc8653b4179a6	3543	Pfam	PF00057	Low-density lipoprotein receptor domain class A	162	197	4.9E-4	T	2025-03-10	IPR002172	Low-density lipoprotein (LDL) receptor class A repeat
XP_623723.2	ce2beb5c953c85373efd5c771d9cf48e	549	Pfam	PF00057	Low-density lipoprotein receptor domain class A	129	163	1.0E-5	T	2025-03-10	IPR002172	Low-density lipoprotein (LDL) receptor class A repeat
XP_006566457.1	c5741882e657d1d5c3627927c1f5fff0	535	Pfam	PF00057	Low-density lipoprotein receptor domain class A	115	149	3.7E-5	T	2025-03-10	IPR002172	Low-density lipoprotein (LDL) receptor class A repeat
XP_006566458.1	9bc0f1dcca8d993271bd0e44a666adb5	543	Pfam	PF00057	Low-density lipoprotein receptor domain class A	123	157	1.0E-5	T	2025-03-10	IPR002172	Low-density lipoprotein (LDL) receptor class A repeat
XP_026298015.1	aa225d09235431dc0b7ca935d935058b	3564	Pfam	PF00059	Lectin C-type domain	51	159	1.8E-11	T	2025-03-10	IPR001304	C-type lectin-like
XP_026298016.1	ddfd0987f0b0218187bdc8653b4179a6	3543	Pfam	PF00059	Lectin C-type domain	51	159	1.8E-11	T	2025-03-10	IPR001304	C-type lectin-like
XP_006571493.1	306961cfecdb57f0f4c540ecc718d324	901	Pfam	PF00060	Ligand-gated ion channel	538	818	1.5E-40	T	2025-03-10	IPR001320	Ionotropic glutamate receptor, C-terminal
XP_006571492.1	306961cfecdb57f0f4c540ecc718d324	901	Pfam	PF00060	Ligand-gated ion channel	538	818	1.5E-40	T	2025-03-10	IPR001320	Ionotropic glutamate receptor, C-terminal
XP_016766386.1	7e2e27b9592159889862282ae941f934	895	Pfam	PF00060	Ligand-gated ion channel	538	812	1.4E-40	T	2025-03-10	IPR001320	Ionotropic glutamate receptor, C-terminal
XP_026296016.1	e05d085aaaa8b94100e08bfff02e9cf2	1637	Pfam	PF00069	Protein kinase domain	32	291	9.9E-36	T	2025-03-10	IPR000719	Protein kinase domain
XP_026296018.1	9e6a530e9ab0c3910af66f16c5e8926e	1635	Pfam	PF00069	Protein kinase domain	32	291	9.8E-36	T	2025-03-10	IPR000719	Protein kinase domain
XP_006557910.2	50c9958f0c677086ca1e888da1eccd50	674	Pfam	PF00069	Protein kinase domain	96	346	3.4E-62	T	2025-03-10	IPR000719	Protein kinase domain
XP_026300470.1	177c41cf25f6281becc0c02fe6ea95cb	514	Pfam	PF00069	Protein kinase domain	1	186	1.3E-47	T	2025-03-10	IPR000719	Protein kinase domain
XP_006557912.2	a0eae5f04a1ff2294d30c10e3a4cdba7	585	Pfam	PF00069	Protein kinase domain	7	257	2.6E-62	T	2025-03-10	IPR000719	Protein kinase domain
XP_026296019.1	2b9a7a1c36b7dd01e4011bdb875b1873	1632	Pfam	PF00069	Protein kinase domain	32	288	2.1E-36	T	2025-03-10	IPR000719	Protein kinase domain
XP_016771210.2	7ab2111d7696176387f6778e109dfac4	628	Pfam	PF00069	Protein kinase domain	50	300	2.9E-62	T	2025-03-10	IPR000719	Protein kinase domain
XP_026296017.1	c7e65482e5879f9b7d1fc95d17432934	1635	Pfam	PF00069	Protein kinase domain	32	288	2.1E-36	T	2025-03-10	IPR000719	Protein kinase domain
XP_026296015.1	75e4d71c126ac7f5bffb0d661590ab8e	1638	Pfam	PF00069	Protein kinase domain	32	291	9.9E-36	T	2025-03-10	IPR000719	Protein kinase domain
XP_624284.3	f674da97728a82378b7f70e2f2b3aabc	623	Pfam	PF00069	Protein kinase domain	45	295	1.8E-62	T	2025-03-10	IPR000719	Protein kinase domain
XP_026295021.1	ddad80a4f14f2e71e919a3de9e3d26e0	1117	Pfam	PF00076	RNA recognition motif	996	1051	4.9E-7	T	2025-03-10	IPR000504	RNA recognition motif domain
XP_026295024.1	19552e638aef23f1b7bcf9f913c7f462	1111	Pfam	PF00076	RNA recognition motif	990	1045	4.9E-7	T	2025-03-10	IPR000504	RNA recognition motif domain
XP_026298015.1	aa225d09235431dc0b7ca935d935058b	3564	Pfam	PF00084	Sushi repeat (SCR repeat)	727	781	7.2E-5	T	2025-03-10	IPR000436	Sushi/SCR/CCP domain
XP_026298015.1	aa225d09235431dc0b7ca935d935058b	3564	Pfam	PF00084	Sushi repeat (SCR repeat)	1043	1098	7.4E-7	T	2025-03-10	IPR000436	Sushi/SCR/CCP domain
XP_026298015.1	aa225d09235431dc0b7ca935d935058b	3564	Pfam	PF00084	Sushi repeat (SCR repeat)	605	661	0.06	T	2025-03-10	IPR000436	Sushi/SCR/CCP domain
XP_026298015.1	aa225d09235431dc0b7ca935d935058b	3564	Pfam	PF00084	Sushi repeat (SCR repeat)	666	722	1.7E-6	T	2025-03-10	IPR000436	Sushi/SCR/CCP domain
XP_026298016.1	ddfd0987f0b0218187bdc8653b4179a6	3543	Pfam	PF00084	Sushi repeat (SCR repeat)	1043	1098	7.4E-7	T	2025-03-10	IPR000436	Sushi/SCR/CCP domain
XP_026298016.1	ddfd0987f0b0218187bdc8653b4179a6	3543	Pfam	PF00084	Sushi repeat (SCR repeat)	666	722	1.7E-6	T	2025-03-10	IPR000436	Sushi/SCR/CCP domain
XP_026298016.1	ddfd0987f0b0218187bdc8653b4179a6	3543	Pfam	PF00084	Sushi repeat (SCR repeat)	605	661	59	T	2025-03-10	IPR000436	Sushi/SCR/CCP domain
XP_026298016.1	ddfd0987f0b0218187bdc8653b4179a6	3543	Pfam	PF00084	Sushi repeat (SCR repeat)	727	781	7.1E-5	T	2025-03-10	IPR000436	Sushi/SCR/CCP domain
XP_003249920.2	2458c6987007fa01b507787b334d3331	925	Pfam	PF00096	Zinc finger, C2H2 type	670	692	4.3	T	2025-03-10	IPR013087	Zinc finger C2H2-type
XP_003249920.2	2458c6987007fa01b507787b334d3331	925	Pfam	PF00096	Zinc finger, C2H2 type	784	806	0.88	T	2025-03-10	IPR013087	Zinc finger C2H2-type
XP_003249920.2	2458c6987007fa01b507787b334d3331	925	Pfam	PF00096	Zinc finger, C2H2 type	642	664	41	T	2025-03-10	IPR013087	Zinc finger C2H2-type
XP_003249920.2	2458c6987007fa01b507787b334d3331	925	Pfam	PF00096	Zinc finger, C2H2 type	701	722	0.49	T	2025-03-10	IPR013087	Zinc finger C2H2-type
XP_003249920.2	2458c6987007fa01b507787b334d3331	925	Pfam	PF00096	Zinc finger, C2H2 type	812	834	19.0	T	2025-03-10	IPR013087	Zinc finger C2H2-type
XP_003249920.2	2458c6987007fa01b507787b334d3331	925	Pfam	PF00096	Zinc finger, C2H2 type	756	778	51	T	2025-03-10	IPR013087	Zinc finger C2H2-type
XP_003249920.2	2458c6987007fa01b507787b334d3331	925	Pfam	PF00096	Zinc finger, C2H2 type	730	750	16.0	T	2025-03-10	IPR013087	Zinc finger C2H2-type
XP_003249920.2	2458c6987007fa01b507787b334d3331	925	Pfam	PF00096	Zinc finger, C2H2 type	840	860	6.1	T	2025-03-10	IPR013087	Zinc finger C2H2-type
XP_006561782.1	2458c6987007fa01b507787b334d3331	925	Pfam	PF00096	Zinc finger, C2H2 type	670	692	4.3	T	2025-03-10	IPR013087	Zinc finger C2H2-type
XP_006561782.1	2458c6987007fa01b507787b334d3331	925	Pfam	PF00096	Zinc finger, C2H2 type	784	806	0.88	T	2025-03-10	IPR013087	Zinc finger C2H2-type
XP_006561782.1	2458c6987007fa01b507787b334d3331	925	Pfam	PF00096	Zinc finger, C2H2 type	642	664	41	T	2025-03-10	IPR013087	Zinc finger C2H2-type
XP_006561782.1	2458c6987007fa01b507787b334d3331	925	Pfam	PF00096	Zinc finger, C2H2 type	701	722	0.49	T	2025-03-10	IPR013087	Zinc finger C2H2-type
XP_006561782.1	2458c6987007fa01b507787b334d3331	925	Pfam	PF00096	Zinc finger, C2H2 type	812	834	19.0	T	2025-03-10	IPR013087	Zinc finger C2H2-type
XP_006561782.1	2458c6987007fa01b507787b334d3331	925	Pfam	PF00096	Zinc finger, C2H2 type	756	778	51	T	2025-03-10	IPR013087	Zinc finger C2H2-type
XP_006561782.1	2458c6987007fa01b507787b334d3331	925	Pfam	PF00096	Zinc finger, C2H2 type	730	750	16.0	T	2025-03-10	IPR013087	Zinc finger C2H2-type
XP_006561782.1	2458c6987007fa01b507787b334d3331	925	Pfam	PF00096	Zinc finger, C2H2 type	840	860	6.1	T	2025-03-10	IPR013087	Zinc finger C2H2-type
XP_016771292.2	446d3d07737307efa868e5f245cfbee7	1313	Pfam	PF00097	Zinc finger, C3HC4 type (RING finger)	10	51	7.1E-5	T	2025-03-10	IPR018957	Zinc finger, C3HC4 RING-type
XP_016771294.2	446d3d07737307efa868e5f245cfbee7	1313	Pfam	PF00097	Zinc finger, C3HC4 type (RING finger)	10	51	7.1E-5	T	2025-03-10	IPR018957	Zinc finger, C3HC4 RING-type
XP_016771296.2	446d3d07737307efa868e5f245cfbee7	1313	Pfam	PF00097	Zinc finger, C3HC4 type (RING finger)	10	51	7.1E-5	T	2025-03-10	IPR018957	Zinc finger, C3HC4 RING-type
XP_026300617.1	446d3d07737307efa868e5f245cfbee7	1313	Pfam	PF00097	Zinc finger, C3HC4 type (RING finger)	10	51	7.1E-5	T	2025-03-10	IPR018957	Zinc finger, C3HC4 RING-type
XP_016771293.2	446d3d07737307efa868e5f245cfbee7	1313	Pfam	PF00097	Zinc finger, C3HC4 type (RING finger)	10	51	7.1E-5	T	2025-03-10	IPR018957	Zinc finger, C3HC4 RING-type
XP_016771295.2	446d3d07737307efa868e5f245cfbee7	1313	Pfam	PF00097	Zinc finger, C3HC4 type (RING finger)	10	51	7.1E-5	T	2025-03-10	IPR018957	Zinc finger, C3HC4 RING-type
XP_026300618.1	671b21ce76550c17bea7ffb8de6924b5	1248	Pfam	PF00097	Zinc finger, C3HC4 type (RING finger)	10	51	6.7E-5	T	2025-03-10	IPR018957	Zinc finger, C3HC4 RING-type
XP_016771297.2	ac580ddca93f701bead6345471d1281e	1281	Pfam	PF00097	Zinc finger, C3HC4 type (RING finger)	10	51	6.9E-5	T	2025-03-10	IPR018957	Zinc finger, C3HC4 RING-type
XP_016771298.2	cc7f43516631049540a6face09fa62ad	1239	Pfam	PF00097	Zinc finger, C3HC4 type (RING finger)	10	51	6.7E-5	T	2025-03-10	IPR018957	Zinc finger, C3HC4 RING-type
XP_026299083.1	71610628b0718e1475ad5e0709d220c6	266	Pfam	PF00106	short chain dehydrogenase	7	199	1.2E-40	T	2025-03-10	IPR002347	Short-chain dehydrogenase/reductase SDR
XP_006568215.3	420db28a13be62f9496c72b76343f92a	394	Pfam	PF00108	Thiolase, N-terminal domain	6	263	6.4E-96	T	2025-03-10	IPR020616	Thiolase, N-terminal
XP_393283.2	f2bc4ddeb64959435958162c721cce28	439	Pfam	PF00112	Papain family cysteine protease	197	432	4.4E-52	T	2025-03-10	IPR000668	Peptidase C1A, papain C-terminal
XP_016767229.1	b59cb49bbb484f3ae2e975536b45bc07	457	Pfam	PF00112	Papain family cysteine protease	215	450	4.9E-52	T	2025-03-10	IPR000668	Peptidase C1A, papain C-terminal
XP_026300653.1	175d88f9bc52dc2db4f3b75b89577d87	527	Pfam	PF00135	Carboxylesterase family	4	515	2.9E-116	T	2025-03-10	IPR002018	Carboxylesterase, type B
NP_001128419.1	175d88f9bc52dc2db4f3b75b89577d87	527	Pfam	PF00135	Carboxylesterase family	4	515	2.9E-116	T	2025-03-10	IPR002018	Carboxylesterase, type B
XP_026297792.1	063c5d6a9558edd723d31eb453cb3595	527	Pfam	PF00135	Carboxylesterase family	3	511	1.8E-117	T	2025-03-10	IPR002018	Carboxylesterase, type B
XP_026297793.1	063c5d6a9558edd723d31eb453cb3595	527	Pfam	PF00135	Carboxylesterase family	3	511	1.8E-117	T	2025-03-10	IPR002018	Carboxylesterase, type B
XP_026297794.1	063c5d6a9558edd723d31eb453cb3595	527	Pfam	PF00135	Carboxylesterase family	3	511	1.8E-117	T	2025-03-10	IPR002018	Carboxylesterase, type B
XP_016768459.2	063c5d6a9558edd723d31eb453cb3595	527	Pfam	PF00135	Carboxylesterase family	3	511	1.8E-117	T	2025-03-10	IPR002018	Carboxylesterase, type B
XP_393293.2	b5b17bfc422fdf22bdd11ddc78d7f766	572	Pfam	PF00135	Carboxylesterase family	26	556	5.0E-131	T	2025-03-10	IPR002018	Carboxylesterase, type B
XP_026296679.1	652e39cd18a6facd00217817c8841694	417	Pfam	PF00155	Aminotransferase class I and II	69	399	1.6E-22	T	2025-03-10	IPR004839	Aminotransferase, class I/classII, large domain
XP_026296678.1	055a52726dab7ec9a37912ef0bc976c9	420	Pfam	PF00155	Aminotransferase class I and II	72	402	1.6E-22	T	2025-03-10	IPR004839	Aminotransferase, class I/classII, large domain
XP_026299236.1	23c4db6f941a52d89062664f7af3e353	460	Pfam	PF00157	Pou domain - N-terminal to homeobox domain	253	323	1.5E-34	T	2025-03-10	IPR000327	POU-specific domain
XP_624240.2	4a162efd29bfeb611135a873ab881043	151	Pfam	PF00179	Ubiquitin-conjugating enzyme	8	144	3.7E-51	T	2025-03-10	IPR000608	Ubiquitin-conjugating enzyme E2
XP_003249705.1	a5ce9383845d3e499a6822beacfbcdb1	161	Pfam	PF00179	Ubiquitin-conjugating enzyme	8	143	5.2E-50	T	2025-03-10	IPR000608	Ubiquitin-conjugating enzyme E2
XP_395614.3	d3b614e13aec5b32a21c9761ab2b37c9	798	Pfam	PF00183	Hsp90 protein	256	776	1.1E-215	T	2025-03-10	IPR001404	Heat shock protein Hsp90 family
XP_026300890.1	f5e4f1483aa6a91abcb9ecceb857bb52	530	Pfam	PF00209	Sodium:neurotransmitter symporter family	24	466	1.1E-122	T	2025-03-10	IPR000175	Sodium:neurotransmitter symporter
XP_006565018.1	2850629fa9625dd3b31f19450d743c58	651	Pfam	PF00209	Sodium:neurotransmitter symporter family	70	587	4.8E-155	T	2025-03-10	IPR000175	Sodium:neurotransmitter symporter
XP_026295626.1	318f88a133a374f68330c2e40719c55c	1289	Pfam	PF00211	Adenylate and Guanylate cyclase catalytic domain	886	1071	2.1E-65	T	2025-03-10	IPR001054	Adenylyl cyclase class-3/4/guanylyl cyclase
XP_026295624.1	318f88a133a374f68330c2e40719c55c	1289	Pfam	PF00211	Adenylate and Guanylate cyclase catalytic domain	886	1071	2.1E-65	T	2025-03-10	IPR001054	Adenylyl cyclase class-3/4/guanylyl cyclase
XP_026295625.1	318f88a133a374f68330c2e40719c55c	1289	Pfam	PF00211	Adenylate and Guanylate cyclase catalytic domain	886	1071	2.1E-65	T	2025-03-10	IPR001054	Adenylyl cyclase class-3/4/guanylyl cyclase
XP_016766759.2	318f88a133a374f68330c2e40719c55c	1289	Pfam	PF00211	Adenylate and Guanylate cyclase catalytic domain	886	1071	2.1E-65	T	2025-03-10	IPR001054	Adenylyl cyclase class-3/4/guanylyl cyclase
XP_026299155.1	7ec86dcc67d3afdde7e35b56dad8a002	211	Pfam	PF00226	DnaJ domain	31	91	8.7E-16	T	2025-03-10	IPR001623	DnaJ domain
XP_016768669.1	6c360c2a5c06df82d372d96e1ee2eaee	440	Pfam	PF00250	Forkhead domain	34	70	9.7E-4	T	2025-03-10	IPR001766	Fork head domain
XP_026297786.1	eb7010c5de5542d26896b708f2dc0fdc	556	Pfam	PF00250	Forkhead domain	105	186	1.6E-22	T	2025-03-10	IPR001766	Fork head domain
XP_016768670.1	eb7010c5de5542d26896b708f2dc0fdc	556	Pfam	PF00250	Forkhead domain	105	186	1.6E-22	T	2025-03-10	IPR001766	Fork head domain
XP_395748.2	219216aa4255514265d5d6a51e6f5106	459	Pfam	PF00254	FKBP-type peptidyl-prolyl cis-trans isomerase	144	231	2.6E-14	T	2025-03-10	IPR001179	FKBP-type peptidyl-prolyl cis-trans isomerase domain
XP_395748.2	219216aa4255514265d5d6a51e6f5106	459	Pfam	PF00254	FKBP-type peptidyl-prolyl cis-trans isomerase	25	115	1.7E-30	T	2025-03-10	IPR001179	FKBP-type peptidyl-prolyl cis-trans isomerase domain
XP_016768023.1	219216aa4255514265d5d6a51e6f5106	459	Pfam	PF00254	FKBP-type peptidyl-prolyl cis-trans isomerase	144	231	2.6E-14	T	2025-03-10	IPR001179	FKBP-type peptidyl-prolyl cis-trans isomerase domain
XP_016768023.1	219216aa4255514265d5d6a51e6f5106	459	Pfam	PF00254	FKBP-type peptidyl-prolyl cis-trans isomerase	25	115	1.7E-30	T	2025-03-10	IPR001179	FKBP-type peptidyl-prolyl cis-trans isomerase domain
XP_006563315.1	a374478a1bc7cf0fd44871940396ee60	404	Pfam	PF00254	FKBP-type peptidyl-prolyl cis-trans isomerase	144	231	2.1E-14	T	2025-03-10	IPR001179	FKBP-type peptidyl-prolyl cis-trans isomerase domain
XP_006563315.1	a374478a1bc7cf0fd44871940396ee60	404	Pfam	PF00254	FKBP-type peptidyl-prolyl cis-trans isomerase	25	115	1.4E-30	T	2025-03-10	IPR001179	FKBP-type peptidyl-prolyl cis-trans isomerase domain
XP_026297051.1	4473d4b5e112630c665b4d521e7c854a	1279	Pfam	PF00270	DEAD/DEAH box helicase	575	742	1.7E-20	T	2025-03-10	IPR011545	DEAD/DEAH box helicase domain
XP_026297050.1	540199baa76f27aedf7d11201377a235	1348	Pfam	PF00270	DEAD/DEAH box helicase	644	811	1.9E-20	T	2025-03-10	IPR011545	DEAD/DEAH box helicase domain
XP_026297051.1	4473d4b5e112630c665b4d521e7c854a	1279	Pfam	PF00271	Helicase conserved C-terminal domain	787	889	4.3E-13	T	2025-03-10	IPR001650	Helicase, C-terminal domain-like
XP_026297050.1	540199baa76f27aedf7d11201377a235	1348	Pfam	PF00271	Helicase conserved C-terminal domain	856	958	4.6E-13	T	2025-03-10	IPR001650	Helicase, C-terminal domain-like
NP_001116485.2	4a92752bb544ee463900e696e10df459	1952	Pfam	PF00271	Helicase conserved C-terminal domain	489	547	1.5E-10	T	2025-03-10	IPR001650	Helicase, C-terminal domain-like
XP_016767546.1	4a92752bb544ee463900e696e10df459	1952	Pfam	PF00271	Helicase conserved C-terminal domain	489	547	1.5E-10	T	2025-03-10	IPR001650	Helicase, C-terminal domain-like
XP_006568175.2	76489bd799644daaab81c415fd102de4	405	Pfam	PF00288	GHMP kinases N terminal domain	79	143	1.1E-8	T	2025-03-10	IPR006204	GHMP kinase N-terminal domain
XP_006568174.2	76489bd799644daaab81c415fd102de4	405	Pfam	PF00288	GHMP kinases N terminal domain	79	143	1.1E-8	T	2025-03-10	IPR006204	GHMP kinase N-terminal domain
XP_016772811.2	76489bd799644daaab81c415fd102de4	405	Pfam	PF00288	GHMP kinases N terminal domain	79	143	1.1E-8	T	2025-03-10	IPR006204	GHMP kinase N-terminal domain
XP_006568173.2	cb606086bc659d9c5bedcd1c9ceb017d	474	Pfam	PF00288	GHMP kinases N terminal domain	148	212	1.4E-8	T	2025-03-10	IPR006204	GHMP kinase N-terminal domain
XP_006568172.2	cb606086bc659d9c5bedcd1c9ceb017d	474	Pfam	PF00288	GHMP kinases N terminal domain	148	212	1.4E-8	T	2025-03-10	IPR006204	GHMP kinase N-terminal domain
XP_006558861.1	956f332a4098e9121c41a04685cafb71	4234	Pfam	PF00307	Calponin homology (CH) domain	195	299	4.9E-23	T	2025-03-10	IPR001715	Calponin homology domain
XP_006558861.1	956f332a4098e9121c41a04685cafb71	4234	Pfam	PF00307	Calponin homology (CH) domain	74	176	1.4E-14	T	2025-03-10	IPR001715	Calponin homology domain
XP_006558862.1	8eac1ac5ed62e7fe682237cbe701ef08	4209	Pfam	PF00307	Calponin homology (CH) domain	195	299	4.8E-23	T	2025-03-10	IPR001715	Calponin homology domain
XP_006558862.1	8eac1ac5ed62e7fe682237cbe701ef08	4209	Pfam	PF00307	Calponin homology (CH) domain	74	176	1.4E-14	T	2025-03-10	IPR001715	Calponin homology domain
XP_006568999.1	77e11ee38dd9c727248204eec7caf393	257	Pfam	PF00335	Tetraspanin family	10	239	9.1E-46	T	2025-03-10	IPR018499	Tetraspanin/Peripherin
XP_006568998.1	77e11ee38dd9c727248204eec7caf393	257	Pfam	PF00335	Tetraspanin family	10	239	9.1E-46	T	2025-03-10	IPR018499	Tetraspanin/Peripherin
XP_016766331.1	77e11ee38dd9c727248204eec7caf393	257	Pfam	PF00335	Tetraspanin family	10	239	9.1E-46	T	2025-03-10	IPR018499	Tetraspanin/Peripherin
XP_006569000.1	77e11ee38dd9c727248204eec7caf393	257	Pfam	PF00335	Tetraspanin family	10	239	9.1E-46	T	2025-03-10	IPR018499	Tetraspanin/Peripherin
XP_026300111.1	3d59584b081e15909c17aba332201190	417	Pfam	PF00348	Polyprenyl synthetase	122	368	1.5E-61	T	2025-03-10	IPR000092	Polyprenyl synthetase
XP_006564680.2	133d8827feb91b1e222f020e1ed6db06	565	Pfam	PF00354	Pentaxin family	97	255	4.3E-12	T	2025-03-10	IPR001759	Pentraxin-related
NP_001011600.1	2ed064cc36000d31630ebdcca00ee48b	683	Pfam	PF00372	Hemocyanin, copper containing domain	159	428	7.1E-91	T	2025-03-10	IPR000896	Hemocyanin/hexamerin middle domain
XP_006568211.1	7fc89a17de51df8917f6a066c6031974	543	Pfam	PF00375	Sodium:dicarboxylate symporter family	65	494	3.5E-108	T	2025-03-10	IPR001991	Sodium:dicarboxylate symporter
NP_001011597.1	7fc89a17de51df8917f6a066c6031974	543	Pfam	PF00375	Sodium:dicarboxylate symporter family	65	494	3.5E-108	T	2025-03-10	IPR001991	Sodium:dicarboxylate symporter
NP_001257758.1	1ab34268b0604fa7e49ede3dcb3bf214	231	Pfam	PF00379	Insect cuticle protein	41	88	0.61	T	2025-03-10	IPR000618	Insect cuticle protein
XP_026296145.1	22691d8726ff5d6c8b333783c76c18b5	311	Pfam	PF00379	Insect cuticle protein	85	132	88	T	2025-03-10	IPR000618	Insect cuticle protein
XP_006562317.1	34be90481a5060900892dc76e8a7f226	747	Pfam	PF00394	Multicopper oxidase	307	456	6.8E-28	T	2025-03-10	IPR001117	Multicopper oxidase, second cupredoxin domain
XP_016768041.1	381aa32bf5c11bfa418de61c3748c2aa	775	Pfam	PF00400	WD domain, G-beta repeat	698	730	23.0	T	2025-03-10	IPR001680	WD40 repeat
XP_016768041.1	381aa32bf5c11bfa418de61c3748c2aa	775	Pfam	PF00400	WD domain, G-beta repeat	612	649	0.13	T	2025-03-10	IPR001680	WD40 repeat
XP_016768041.1	381aa32bf5c11bfa418de61c3748c2aa	775	Pfam	PF00400	WD domain, G-beta repeat	582	607	2.0	T	2025-03-10	IPR001680	WD40 repeat
XP_016768041.1	381aa32bf5c11bfa418de61c3748c2aa	775	Pfam	PF00400	WD domain, G-beta repeat	480	514	36.0	T	2025-03-10	IPR001680	WD40 repeat
XP_016768041.1	381aa32bf5c11bfa418de61c3748c2aa	775	Pfam	PF00400	WD domain, G-beta repeat	744	771	22.0	T	2025-03-10	IPR001680	WD40 repeat
XP_394649.3	6d48bc2f16c9e337fc9024b71c19d7f2	796	Pfam	PF00400	WD domain, G-beta repeat	603	628	2.0	T	2025-03-10	IPR001680	WD40 repeat
XP_394649.3	6d48bc2f16c9e337fc9024b71c19d7f2	796	Pfam	PF00400	WD domain, G-beta repeat	633	670	0.13	T	2025-03-10	IPR001680	WD40 repeat
XP_394649.3	6d48bc2f16c9e337fc9024b71c19d7f2	796	Pfam	PF00400	WD domain, G-beta repeat	719	751	24.0	T	2025-03-10	IPR001680	WD40 repeat
XP_394649.3	6d48bc2f16c9e337fc9024b71c19d7f2	796	Pfam	PF00400	WD domain, G-beta repeat	765	792	23.0	T	2025-03-10	IPR001680	WD40 repeat
XP_394649.3	6d48bc2f16c9e337fc9024b71c19d7f2	796	Pfam	PF00400	WD domain, G-beta repeat	501	535	37.0	T	2025-03-10	IPR001680	WD40 repeat
XP_026301887.1	a7e71da1adc864d29fa2efe8a6ce03a5	1785	Pfam	PF00412	LIM domain	1716	1776	26	T	2025-03-10	IPR001781	Zinc finger, LIM-type
XP_026301888.1	330f68b904514718c7e8af5a13decbbb	1459	Pfam	PF00412	LIM domain	1390	1450	15	T	2025-03-10	IPR001781	Zinc finger, LIM-type
XP_016770421.1	51febaad90b0658d9a9d543a4ca98fc2	1791	Pfam	PF00412	LIM domain	1722	1782	23	T	2025-03-10	IPR001781	Zinc finger, LIM-type
XP_006571084.1	a24b43274b1de7a969bd973d2ac921e9	1804	Pfam	PF00412	LIM domain	1735	1795	23	T	2025-03-10	IPR001781	Zinc finger, LIM-type
XP_006571085.1	a24b43274b1de7a969bd973d2ac921e9	1804	Pfam	PF00412	LIM domain	1735	1795	23	T	2025-03-10	IPR001781	Zinc finger, LIM-type
XP_006571083.1	a24b43274b1de7a969bd973d2ac921e9	1804	Pfam	PF00412	LIM domain	1735	1795	23	T	2025-03-10	IPR001781	Zinc finger, LIM-type
XP_006571086.1	a24b43274b1de7a969bd973d2ac921e9	1804	Pfam	PF00412	LIM domain	1735	1795	23	T	2025-03-10	IPR001781	Zinc finger, LIM-type
XP_006571087.1	a24b43274b1de7a969bd973d2ac921e9	1804	Pfam	PF00412	LIM domain	1735	1795	23	T	2025-03-10	IPR001781	Zinc finger, LIM-type
XP_026301886.1	8bb58b52af631b8f2af7dec2b2374aca	1801	Pfam	PF00412	LIM domain	1735	1795	23	T	2025-03-10	IPR001781	Zinc finger, LIM-type
XP_026300705.1	b05b64ec71bed4022c047d1571c2de1b	562	Pfam	PF00413	Matrixin	33	192	1.2E-50	T	2025-03-10	IPR001818	Peptidase M10, metallopeptidase
XP_026300724.1	a00ff16d7a1ae47f8664d1e51177966b	539	Pfam	PF00413	Matrixin	17	169	6.7E-48	T	2025-03-10	IPR001818	Peptidase M10, metallopeptidase
XP_026300672.1	f4a5dcc4bd9743188399f48db360f205	607	Pfam	PF00413	Matrixin	78	237	1.4E-50	T	2025-03-10	IPR001818	Peptidase M10, metallopeptidase
XP_026300596.1	d88a67b01d7bf161dfc35bd13695d898	642	Pfam	PF00413	Matrixin	113	272	1.5E-50	T	2025-03-10	IPR001818	Peptidase M10, metallopeptidase
XP_026300652.1	d88a67b01d7bf161dfc35bd13695d898	642	Pfam	PF00413	Matrixin	113	272	1.5E-50	T	2025-03-10	IPR001818	Peptidase M10, metallopeptidase
XP_006563337.2	d88a67b01d7bf161dfc35bd13695d898	642	Pfam	PF00413	Matrixin	113	272	1.5E-50	T	2025-03-10	IPR001818	Peptidase M10, metallopeptidase
XP_026300635.1	d88a67b01d7bf161dfc35bd13695d898	642	Pfam	PF00413	Matrixin	113	272	1.5E-50	T	2025-03-10	IPR001818	Peptidase M10, metallopeptidase
XP_026298015.1	aa225d09235431dc0b7ca935d935058b	3564	Pfam	PF00431	CUB domain	317	426	7.5E-13	T	2025-03-10	IPR000859	CUB domain
XP_026298015.1	aa225d09235431dc0b7ca935d935058b	3564	Pfam	PF00431	CUB domain	201	309	1.4E-14	T	2025-03-10	IPR000859	CUB domain
XP_026298015.1	aa225d09235431dc0b7ca935d935058b	3564	Pfam	PF00431	CUB domain	430	539	2.5E-9	T	2025-03-10	IPR000859	CUB domain
XP_026296010.1	8a071d39129678061cb38cee31e48e02	821	Pfam	PF00431	CUB domain	312	394	1.0E-8	T	2025-03-10	IPR000859	CUB domain
XP_006567320.2	bee18d68e275407fb4f7843ef491895c	909	Pfam	PF00431	CUB domain	244	347	1.2E-22	T	2025-03-10	IPR000859	CUB domain
XP_006567320.2	bee18d68e275407fb4f7843ef491895c	909	Pfam	PF00431	CUB domain	400	482	1.2E-8	T	2025-03-10	IPR000859	CUB domain
XP_394492.6	bee18d68e275407fb4f7843ef491895c	909	Pfam	PF00431	CUB domain	244	347	1.2E-22	T	2025-03-10	IPR000859	CUB domain
XP_394492.6	bee18d68e275407fb4f7843ef491895c	909	Pfam	PF00431	CUB domain	400	482	1.2E-8	T	2025-03-10	IPR000859	CUB domain
XP_006567319.2	bee18d68e275407fb4f7843ef491895c	909	Pfam	PF00431	CUB domain	244	347	1.2E-22	T	2025-03-10	IPR000859	CUB domain
XP_006567319.2	bee18d68e275407fb4f7843ef491895c	909	Pfam	PF00431	CUB domain	400	482	1.2E-8	T	2025-03-10	IPR000859	CUB domain
XP_006567318.2	bee18d68e275407fb4f7843ef491895c	909	Pfam	PF00431	CUB domain	244	347	1.2E-22	T	2025-03-10	IPR000859	CUB domain
XP_006567318.2	bee18d68e275407fb4f7843ef491895c	909	Pfam	PF00431	CUB domain	400	482	1.2E-8	T	2025-03-10	IPR000859	CUB domain
XP_026298016.1	ddfd0987f0b0218187bdc8653b4179a6	3543	Pfam	PF00431	CUB domain	430	539	2.4E-9	T	2025-03-10	IPR000859	CUB domain
XP_026298016.1	ddfd0987f0b0218187bdc8653b4179a6	3543	Pfam	PF00431	CUB domain	317	426	7.5E-13	T	2025-03-10	IPR000859	CUB domain
XP_026298016.1	ddfd0987f0b0218187bdc8653b4179a6	3543	Pfam	PF00431	CUB domain	201	309	1.4E-14	T	2025-03-10	IPR000859	CUB domain
XP_026296011.1	30cbfce641675593f62b0b4c9faef37a	820	Pfam	PF00431	CUB domain	311	393	1.0E-8	T	2025-03-10	IPR000859	CUB domain
XP_026296011.1	30cbfce641675593f62b0b4c9faef37a	820	Pfam	PF00431	CUB domain	155	258	1.0E-22	T	2025-03-10	IPR000859	CUB domain
XP_016767126.2	30cbfce641675593f62b0b4c9faef37a	820	Pfam	PF00431	CUB domain	311	393	1.0E-8	T	2025-03-10	IPR000859	CUB domain
XP_016767126.2	30cbfce641675593f62b0b4c9faef37a	820	Pfam	PF00431	CUB domain	155	258	1.0E-22	T	2025-03-10	IPR000859	CUB domain
XP_006558861.1	956f332a4098e9121c41a04685cafb71	4234	Pfam	PF00435	Spectrin repeat	3369	3471	5.9E-18	T	2025-03-10	IPR002017	Spectrin repeat
XP_006558861.1	956f332a4098e9121c41a04685cafb71	4234	Pfam	PF00435	Spectrin repeat	1869	1951	1.9E-10	T	2025-03-10	IPR002017	Spectrin repeat
XP_006558861.1	956f332a4098e9121c41a04685cafb71	4234	Pfam	PF00435	Spectrin repeat	2631	2729	7.1E-9	T	2025-03-10	IPR002017	Spectrin repeat
XP_006558861.1	956f332a4098e9121c41a04685cafb71	4234	Pfam	PF00435	Spectrin repeat	1991	2093	4.4E-14	T	2025-03-10	IPR002017	Spectrin repeat
XP_006558861.1	956f332a4098e9121c41a04685cafb71	4234	Pfam	PF00435	Spectrin repeat	2525	2628	1.6E-11	T	2025-03-10	IPR002017	Spectrin repeat
XP_006558861.1	956f332a4098e9121c41a04685cafb71	4234	Pfam	PF00435	Spectrin repeat	447	545	1.1E-8	T	2025-03-10	IPR002017	Spectrin repeat
XP_006558861.1	956f332a4098e9121c41a04685cafb71	4234	Pfam	PF00435	Spectrin repeat	1025	1123	4.1E-10	T	2025-03-10	IPR002017	Spectrin repeat
XP_006558861.1	956f332a4098e9121c41a04685cafb71	4234	Pfam	PF00435	Spectrin repeat	657	759	9.5E-16	T	2025-03-10	IPR002017	Spectrin repeat
XP_006558861.1	956f332a4098e9121c41a04685cafb71	4234	Pfam	PF00435	Spectrin repeat	1655	1757	4.8E-15	T	2025-03-10	IPR002017	Spectrin repeat
XP_006558861.1	956f332a4098e9121c41a04685cafb71	4234	Pfam	PF00435	Spectrin repeat	3049	3152	1.0E-16	T	2025-03-10	IPR002017	Spectrin repeat
XP_006558861.1	956f332a4098e9121c41a04685cafb71	4234	Pfam	PF00435	Spectrin repeat	764	833	1.9E-14	T	2025-03-10	IPR002017	Spectrin repeat
XP_006558861.1	956f332a4098e9121c41a04685cafb71	4234	Pfam	PF00435	Spectrin repeat	3475	3577	7.5E-12	T	2025-03-10	IPR002017	Spectrin repeat
XP_006558861.1	956f332a4098e9121c41a04685cafb71	4234	Pfam	PF00435	Spectrin repeat	1444	1546	1.8E-18	T	2025-03-10	IPR002017	Spectrin repeat
XP_006558861.1	956f332a4098e9121c41a04685cafb71	4234	Pfam	PF00435	Spectrin repeat	2097	2199	1.8E-12	T	2025-03-10	IPR002017	Spectrin repeat
XP_006558861.1	956f332a4098e9121c41a04685cafb71	4234	Pfam	PF00435	Spectrin repeat	3263	3364	2.1E-16	T	2025-03-10	IPR002017	Spectrin repeat
XP_006558861.1	956f332a4098e9121c41a04685cafb71	4234	Pfam	PF00435	Spectrin repeat	3157	3260	5.2E-16	T	2025-03-10	IPR002017	Spectrin repeat
XP_006558861.1	956f332a4098e9121c41a04685cafb71	4234	Pfam	PF00435	Spectrin repeat	2418	2520	1.8E-14	T	2025-03-10	IPR002017	Spectrin repeat
XP_006558861.1	956f332a4098e9121c41a04685cafb71	4234	Pfam	PF00435	Spectrin repeat	2311	2412	8.5E-14	T	2025-03-10	IPR002017	Spectrin repeat
XP_006558861.1	956f332a4098e9121c41a04685cafb71	4234	Pfam	PF00435	Spectrin repeat	1237	1335	0.0012	T	2025-03-10	IPR002017	Spectrin repeat
XP_006558861.1	956f332a4098e9121c41a04685cafb71	4234	Pfam	PF00435	Spectrin repeat	2732	2836	5.1E-17	T	2025-03-10	IPR002017	Spectrin repeat
XP_006558861.1	956f332a4098e9121c41a04685cafb71	4234	Pfam	PF00435	Spectrin repeat	2204	2305	5.6E-14	T	2025-03-10	IPR002017	Spectrin repeat
XP_006558861.1	956f332a4098e9121c41a04685cafb71	4234	Pfam	PF00435	Spectrin repeat	1129	1230	4.8E-16	T	2025-03-10	IPR002017	Spectrin repeat
XP_006558861.1	956f332a4098e9121c41a04685cafb71	4234	Pfam	PF00435	Spectrin repeat	3581	3689	8.1E-7	T	2025-03-10	IPR002017	Spectrin repeat
XP_006558861.1	956f332a4098e9121c41a04685cafb71	4234	Pfam	PF00435	Spectrin repeat	1552	1652	1.1E-11	T	2025-03-10	IPR002017	Spectrin repeat
XP_006558861.1	956f332a4098e9121c41a04685cafb71	4234	Pfam	PF00435	Spectrin repeat	555	654	0.0011	T	2025-03-10	IPR002017	Spectrin repeat
XP_006558861.1	956f332a4098e9121c41a04685cafb71	4234	Pfam	PF00435	Spectrin repeat	2838	2940	2.7E-16	T	2025-03-10	IPR002017	Spectrin repeat
XP_006558861.1	956f332a4098e9121c41a04685cafb71	4234	Pfam	PF00435	Spectrin repeat	2945	3047	6.2E-15	T	2025-03-10	IPR002017	Spectrin repeat
XP_006558861.1	956f332a4098e9121c41a04685cafb71	4234	Pfam	PF00435	Spectrin repeat	1338	1440	3.3E-17	T	2025-03-10	IPR002017	Spectrin repeat
XP_006558861.1	956f332a4098e9121c41a04685cafb71	4234	Pfam	PF00435	Spectrin repeat	1761	1863	3.6E-16	T	2025-03-10	IPR002017	Spectrin repeat
XP_006558862.1	8eac1ac5ed62e7fe682237cbe701ef08	4209	Pfam	PF00435	Spectrin repeat	3369	3471	5.9E-18	T	2025-03-10	IPR002017	Spectrin repeat
XP_006558862.1	8eac1ac5ed62e7fe682237cbe701ef08	4209	Pfam	PF00435	Spectrin repeat	2732	2836	5.0E-17	T	2025-03-10	IPR002017	Spectrin repeat
XP_006558862.1	8eac1ac5ed62e7fe682237cbe701ef08	4209	Pfam	PF00435	Spectrin repeat	2525	2628	1.6E-11	T	2025-03-10	IPR002017	Spectrin repeat
XP_006558862.1	8eac1ac5ed62e7fe682237cbe701ef08	4209	Pfam	PF00435	Spectrin repeat	1991	2093	4.4E-14	T	2025-03-10	IPR002017	Spectrin repeat
XP_006558862.1	8eac1ac5ed62e7fe682237cbe701ef08	4209	Pfam	PF00435	Spectrin repeat	447	545	1.1E-8	T	2025-03-10	IPR002017	Spectrin repeat
XP_006558862.1	8eac1ac5ed62e7fe682237cbe701ef08	4209	Pfam	PF00435	Spectrin repeat	2418	2520	1.7E-14	T	2025-03-10	IPR002017	Spectrin repeat
XP_006558862.1	8eac1ac5ed62e7fe682237cbe701ef08	4209	Pfam	PF00435	Spectrin repeat	1655	1757	4.8E-15	T	2025-03-10	IPR002017	Spectrin repeat
XP_006558862.1	8eac1ac5ed62e7fe682237cbe701ef08	4209	Pfam	PF00435	Spectrin repeat	1025	1123	4.0E-10	T	2025-03-10	IPR002017	Spectrin repeat
XP_006558862.1	8eac1ac5ed62e7fe682237cbe701ef08	4209	Pfam	PF00435	Spectrin repeat	3049	3152	1.0E-16	T	2025-03-10	IPR002017	Spectrin repeat
XP_006558862.1	8eac1ac5ed62e7fe682237cbe701ef08	4209	Pfam	PF00435	Spectrin repeat	3475	3577	7.4E-12	T	2025-03-10	IPR002017	Spectrin repeat
XP_006558862.1	8eac1ac5ed62e7fe682237cbe701ef08	4209	Pfam	PF00435	Spectrin repeat	764	833	1.9E-14	T	2025-03-10	IPR002017	Spectrin repeat
XP_006558862.1	8eac1ac5ed62e7fe682237cbe701ef08	4209	Pfam	PF00435	Spectrin repeat	1444	1546	1.8E-18	T	2025-03-10	IPR002017	Spectrin repeat
XP_006558862.1	8eac1ac5ed62e7fe682237cbe701ef08	4209	Pfam	PF00435	Spectrin repeat	2631	2729	7.0E-9	T	2025-03-10	IPR002017	Spectrin repeat
XP_006558862.1	8eac1ac5ed62e7fe682237cbe701ef08	4209	Pfam	PF00435	Spectrin repeat	2097	2199	1.8E-12	T	2025-03-10	IPR002017	Spectrin repeat
XP_006558862.1	8eac1ac5ed62e7fe682237cbe701ef08	4209	Pfam	PF00435	Spectrin repeat	3263	3364	2.1E-16	T	2025-03-10	IPR002017	Spectrin repeat
XP_006558862.1	8eac1ac5ed62e7fe682237cbe701ef08	4209	Pfam	PF00435	Spectrin repeat	1869	1951	1.8E-10	T	2025-03-10	IPR002017	Spectrin repeat
XP_006558862.1	8eac1ac5ed62e7fe682237cbe701ef08	4209	Pfam	PF00435	Spectrin repeat	1237	1335	0.0012	T	2025-03-10	IPR002017	Spectrin repeat
XP_006558862.1	8eac1ac5ed62e7fe682237cbe701ef08	4209	Pfam	PF00435	Spectrin repeat	2204	2305	5.6E-14	T	2025-03-10	IPR002017	Spectrin repeat
XP_006558862.1	8eac1ac5ed62e7fe682237cbe701ef08	4209	Pfam	PF00435	Spectrin repeat	1129	1230	4.8E-16	T	2025-03-10	IPR002017	Spectrin repeat
XP_006558862.1	8eac1ac5ed62e7fe682237cbe701ef08	4209	Pfam	PF00435	Spectrin repeat	3581	3689	8.1E-7	T	2025-03-10	IPR002017	Spectrin repeat
XP_006558862.1	8eac1ac5ed62e7fe682237cbe701ef08	4209	Pfam	PF00435	Spectrin repeat	3157	3260	5.1E-16	T	2025-03-10	IPR002017	Spectrin repeat
XP_006558862.1	8eac1ac5ed62e7fe682237cbe701ef08	4209	Pfam	PF00435	Spectrin repeat	1552	1652	1.1E-11	T	2025-03-10	IPR002017	Spectrin repeat
XP_006558862.1	8eac1ac5ed62e7fe682237cbe701ef08	4209	Pfam	PF00435	Spectrin repeat	2838	2940	2.7E-16	T	2025-03-10	IPR002017	Spectrin repeat
XP_006558862.1	8eac1ac5ed62e7fe682237cbe701ef08	4209	Pfam	PF00435	Spectrin repeat	657	759	9.4E-16	T	2025-03-10	IPR002017	Spectrin repeat
XP_006558862.1	8eac1ac5ed62e7fe682237cbe701ef08	4209	Pfam	PF00435	Spectrin repeat	2311	2412	8.4E-14	T	2025-03-10	IPR002017	Spectrin repeat
XP_006558862.1	8eac1ac5ed62e7fe682237cbe701ef08	4209	Pfam	PF00435	Spectrin repeat	555	654	0.0011	T	2025-03-10	IPR002017	Spectrin repeat
XP_006558862.1	8eac1ac5ed62e7fe682237cbe701ef08	4209	Pfam	PF00435	Spectrin repeat	2945	3047	6.2E-15	T	2025-03-10	IPR002017	Spectrin repeat
XP_006558862.1	8eac1ac5ed62e7fe682237cbe701ef08	4209	Pfam	PF00435	Spectrin repeat	1761	1863	3.6E-16	T	2025-03-10	IPR002017	Spectrin repeat
XP_006558862.1	8eac1ac5ed62e7fe682237cbe701ef08	4209	Pfam	PF00435	Spectrin repeat	1338	1440	3.3E-17	T	2025-03-10	IPR002017	Spectrin repeat
XP_026301491.1	77c43cc87cd8a194a562ac905fd877d9	1567	Pfam	PF00458	WHEP-TRS domain	907	957	2.3E-16	T	2025-03-10	IPR000738	WHEP-TRS domain
XP_026301491.1	77c43cc87cd8a194a562ac905fd877d9	1567	Pfam	PF00458	WHEP-TRS domain	974	1020	2.0E-13	T	2025-03-10	IPR000738	WHEP-TRS domain
XP_026301491.1	77c43cc87cd8a194a562ac905fd877d9	1567	Pfam	PF00458	WHEP-TRS domain	840	889	4.6E-16	T	2025-03-10	IPR000738	WHEP-TRS domain
XP_026296169.1	3e073b73f554b04501999d8759bcd352	358	Pfam	PF00487	Fatty acid desaturase	68	269	2.1E-14	T	2025-03-10	IPR005804	Fatty acid desaturase domain
XP_026296170.1	bb6a5da64eda83a8035045022faf937b	287	Pfam	PF00487	Fatty acid desaturase	2	198	2.2E-14	T	2025-03-10	IPR005804	Fatty acid desaturase domain
XP_026300482.1	7802ff0a0088cbcd88ff8b761e5edeaa	478	Pfam	PF00505	HMG (high mobility group) box	140	208	5.7E-24	T	2025-03-10	IPR009071	High mobility group box domain
XP_026300483.1	90c4c7a7ffda903d95d590a472449e0b	459	Pfam	PF00505	HMG (high mobility group) box	140	208	5.3E-24	T	2025-03-10	IPR009071	High mobility group box domain
XP_026300481.1	ff65dde615a8c2aa878b92137481e5fa	506	Pfam	PF00505	HMG (high mobility group) box	140	208	6.2E-24	T	2025-03-10	IPR009071	High mobility group box domain
XP_006567264.1	07eb7989c5efb86f96872857f4665ed0	796	Pfam	PF00515	Tetratricopeptide repeat	748	780	8.4E-4	T	2025-03-10	IPR019734	Tetratricopeptide repeat
XP_006567267.1	f37b16938a895d96e457b7b180ee8569	539	Pfam	PF00515	Tetratricopeptide repeat	6	37	0.0025	T	2025-03-10	IPR019734	Tetratricopeptide repeat
XP_006567267.1	f37b16938a895d96e457b7b180ee8569	539	Pfam	PF00515	Tetratricopeptide repeat	228	256	0.0017	T	2025-03-10	IPR019734	Tetratricopeptide repeat
XP_006563315.1	a374478a1bc7cf0fd44871940396ee60	404	Pfam	PF00515	Tetratricopeptide repeat	301	332	0.0048	T	2025-03-10	IPR019734	Tetratricopeptide repeat
XP_006567263.1	cfa7af442ef7e14613aa573e4e8ecec9	818	Pfam	PF00515	Tetratricopeptide repeat	770	802	8.7E-4	T	2025-03-10	IPR019734	Tetratricopeptide repeat
XP_392318.4	df1e4552ded25ffd6b3c1b86ca8577cb	843	Pfam	PF00515	Tetratricopeptide repeat	795	827	9.0E-4	T	2025-03-10	IPR019734	Tetratricopeptide repeat
XP_392862.3	c49a29c5bd8a28f72cffc0b3e8c5e5fa	1285	Pfam	PF00566	Rab-GTPase-TBC domain	682	893	5.5E-51	T	2025-03-10	IPR000195	Rab-GAP-TBC domain
XP_006560524.1	a4b2963dea96ab4a6d57245825daefc3	1249	Pfam	PF00566	Rab-GTPase-TBC domain	646	857	5.3E-51	T	2025-03-10	IPR000195	Rab-GAP-TBC domain
XP_006560522.1	a4b2963dea96ab4a6d57245825daefc3	1249	Pfam	PF00566	Rab-GTPase-TBC domain	646	857	5.3E-51	T	2025-03-10	IPR000195	Rab-GAP-TBC domain
XP_016766910.1	a4b2963dea96ab4a6d57245825daefc3	1249	Pfam	PF00566	Rab-GTPase-TBC domain	646	857	5.3E-51	T	2025-03-10	IPR000195	Rab-GAP-TBC domain
XP_026297051.1	4473d4b5e112630c665b4d521e7c854a	1279	Pfam	PF00570	HRDC domain	1118	1184	1.7E-7	T	2025-03-10	IPR002121	HRDC domain
XP_026297050.1	540199baa76f27aedf7d11201377a235	1348	Pfam	PF00570	HRDC domain	1187	1253	1.9E-7	T	2025-03-10	IPR002121	HRDC domain
XP_026301491.1	77c43cc87cd8a194a562ac905fd877d9	1567	Pfam	PF00587	tRNA synthetase class II core domain (G, H, P, S and T)	1165	1336	1.2E-17	T	2025-03-10	IPR002314	Aminoacyl-tRNA synthetase, class II (G/ P/ S/T)
NP_001116485.2	4a92752bb544ee463900e696e10df459	1952	Pfam	PF00636	Ribonuclease III domain	1436	1611	1.6E-12	T	2025-03-10	IPR000999	Ribonuclease III domain
NP_001116485.2	4a92752bb544ee463900e696e10df459	1952	Pfam	PF00636	Ribonuclease III domain	1731	1852	1.4E-18	T	2025-03-10	IPR000999	Ribonuclease III domain
XP_016767546.1	4a92752bb544ee463900e696e10df459	1952	Pfam	PF00636	Ribonuclease III domain	1436	1611	1.6E-12	T	2025-03-10	IPR000999	Ribonuclease III domain
XP_016767546.1	4a92752bb544ee463900e696e10df459	1952	Pfam	PF00636	Ribonuclease III domain	1731	1852	1.4E-18	T	2025-03-10	IPR000999	Ribonuclease III domain
XP_392862.3	c49a29c5bd8a28f72cffc0b3e8c5e5fa	1285	Pfam	PF00640	Phosphotyrosine interaction domain (PTB/PID)	228	315	22	T	2025-03-10	IPR006020	PTB/PI domain
XP_006560524.1	a4b2963dea96ab4a6d57245825daefc3	1249	Pfam	PF00640	Phosphotyrosine interaction domain (PTB/PID)	192	279	22	T	2025-03-10	IPR006020	PTB/PI domain
XP_006560522.1	a4b2963dea96ab4a6d57245825daefc3	1249	Pfam	PF00640	Phosphotyrosine interaction domain (PTB/PID)	192	279	22	T	2025-03-10	IPR006020	PTB/PI domain
XP_016766910.1	a4b2963dea96ab4a6d57245825daefc3	1249	Pfam	PF00640	Phosphotyrosine interaction domain (PTB/PID)	192	279	22	T	2025-03-10	IPR006020	PTB/PI domain
XP_026297365.1	3c5f29f151de6ba8934b078a5e9a6774	2221	Pfam	PF00651	BTB/POZ domain	1432	1534	5.1E-10	T	2025-03-10	IPR000210	BTB/POZ domain
NP_001265260.1	3c5f29f151de6ba8934b078a5e9a6774	2221	Pfam	PF00651	BTB/POZ domain	1432	1534	5.1E-10	T	2025-03-10	IPR000210	BTB/POZ domain
XP_026297366.1	01e8550a1db15359cb36a98bf1fe7f73	2220	Pfam	PF00651	BTB/POZ domain	1431	1533	5.1E-10	T	2025-03-10	IPR000210	BTB/POZ domain
XP_026297367.1	9f91610d0cd2ded65f272ff956318e00	2155	Pfam	PF00651	BTB/POZ domain	1366	1468	4.9E-10	T	2025-03-10	IPR000210	BTB/POZ domain
XP_003249920.2	2458c6987007fa01b507787b334d3331	925	Pfam	PF00651	BTB/POZ domain	20	115	1.7E-12	T	2025-03-10	IPR000210	BTB/POZ domain
XP_006561782.1	2458c6987007fa01b507787b334d3331	925	Pfam	PF00651	BTB/POZ domain	20	115	1.7E-12	T	2025-03-10	IPR000210	BTB/POZ domain
XP_006565044.2	ca6c66d840d0a256db85088ebe878bea	632	Pfam	PF00732	GMC oxidoreductase	52	351	7.6E-44	T	2025-03-10	IPR000172	Glucose-methanol-choline oxidoreductase, N-terminal
XP_003250569.2	ca6c66d840d0a256db85088ebe878bea	632	Pfam	PF00732	GMC oxidoreductase	52	351	7.6E-44	T	2025-03-10	IPR000172	Glucose-methanol-choline oxidoreductase, N-terminal
XP_001122155.2	86eb378d8d990fa2d0ab773098c866bd	433	Pfam	PF00743	Flavin-binding monooxygenase-like	235	419	2.4E-10	T	2025-03-10	IPR020946	Flavin monooxygenase-like
XP_001122155.2	86eb378d8d990fa2d0ab773098c866bd	433	Pfam	PF00743	Flavin-binding monooxygenase-like	6	227	1.3E-42	T	2025-03-10	IPR020946	Flavin monooxygenase-like
XP_026301491.1	77c43cc87cd8a194a562ac905fd877d9	1567	Pfam	PF00749	tRNA synthetases class I (E and Q), catalytic domain	215	519	1.1E-115	T	2025-03-10	IPR020058	Glutamyl/glutaminyl-tRNA synthetase, class Ib, catalytic domain
XP_026298015.1	aa225d09235431dc0b7ca935d935058b	3564	Pfam	PF00754	F5/8 type C domain	1308	1432	1.1E-4	T	2025-03-10	IPR000421	Coagulation factor 5/8, C-terminal domain
XP_026298015.1	aa225d09235431dc0b7ca935d935058b	3564	Pfam	PF00754	F5/8 type C domain	837	963	1.8E-10	T	2025-03-10	IPR000421	Coagulation factor 5/8, C-terminal domain
XP_026298016.1	ddfd0987f0b0218187bdc8653b4179a6	3543	Pfam	PF00754	F5/8 type C domain	1308	1432	1.1E-4	T	2025-03-10	IPR000421	Coagulation factor 5/8, C-terminal domain
XP_026298016.1	ddfd0987f0b0218187bdc8653b4179a6	3543	Pfam	PF00754	F5/8 type C domain	837	963	1.8E-10	T	2025-03-10	IPR000421	Coagulation factor 5/8, C-terminal domain
XP_016766676.2	cbab2efbaafcd5ba25babd2bcec1849b	389	Pfam	PF00764	Arginosuccinate synthase N-terminal HUP domain	37	148	3.6E-30	T	2025-03-10	IPR048267	Arginosuccinate synthase-like, N-terminal domain
XP_396374.3	e4d2343bc5a8bfd9a94654ed97636411	412	Pfam	PF00764	Arginosuccinate synthase N-terminal HUP domain	7	171	9.0E-56	T	2025-03-10	IPR048267	Arginosuccinate synthase-like, N-terminal domain
XP_623910.4	d85f77c60de789635457d2bcfa4df898	1467	Pfam	PF00780	CNH domain	1122	1375	4.9E-40	T	2025-03-10	IPR001180	Citron homology (CNH) domain
XP_006558258.2	05d59a238a1e0af0d677da816b7a8872	1458	Pfam	PF00780	CNH domain	1107	1360	4.9E-40	T	2025-03-10	IPR001180	Citron homology (CNH) domain
XP_016769133.2	cd5c7c3a52db248a4b87b6f7305c4dea	1473	Pfam	PF00780	CNH domain	1122	1375	4.9E-40	T	2025-03-10	IPR001180	Citron homology (CNH) domain
XP_006560392.1	c5e951933de5b9ed557680ab4fbe5bda	349	Pfam	PF00788	Ras association (RalGDS/AF-6) domain	135	223	7.3E-10	T	2025-03-10	IPR000159	Ras-associating domain
XP_006560392.1	c5e951933de5b9ed557680ab4fbe5bda	349	Pfam	PF00788	Ras association (RalGDS/AF-6) domain	42	132	3.2E-12	T	2025-03-10	IPR000159	Ras-associating domain
XP_006560390.1	632125eb0371a0afb728f0ea36333e33	364	Pfam	PF00788	Ras association (RalGDS/AF-6) domain	56	147	2.0E-12	T	2025-03-10	IPR000159	Ras-associating domain
XP_006560390.1	632125eb0371a0afb728f0ea36333e33	364	Pfam	PF00788	Ras association (RalGDS/AF-6) domain	150	238	7.9E-10	T	2025-03-10	IPR000159	Ras-associating domain
XP_006560391.1	6505556119fa0940eaff6c1b67bb9898	355	Pfam	PF00788	Ras association (RalGDS/AF-6) domain	141	229	7.5E-10	T	2025-03-10	IPR000159	Ras-associating domain
XP_006560391.1	6505556119fa0940eaff6c1b67bb9898	355	Pfam	PF00788	Ras association (RalGDS/AF-6) domain	46	138	1.6E-12	T	2025-03-10	IPR000159	Ras-associating domain
XP_006560389.1	4c5e3c3e0c2d1611d0b1909d0ad31869	369	Pfam	PF00788	Ras association (RalGDS/AF-6) domain	155	243	8.1E-10	T	2025-03-10	IPR000159	Ras-associating domain
XP_006560389.1	4c5e3c3e0c2d1611d0b1909d0ad31869	369	Pfam	PF00788	Ras association (RalGDS/AF-6) domain	60	152	1.7E-12	T	2025-03-10	IPR000159	Ras-associating domain
XP_393936.4	260bc1fb7a2ed8f039b00452f3ec20aa	377	Pfam	PF00788	Ras association (RalGDS/AF-6) domain	68	160	1.6E-12	T	2025-03-10	IPR000159	Ras-associating domain
XP_393936.4	260bc1fb7a2ed8f039b00452f3ec20aa	377	Pfam	PF00788	Ras association (RalGDS/AF-6) domain	163	251	8.4E-10	T	2025-03-10	IPR000159	Ras-associating domain
NP_001011613.1	6d6895b2e0a1bbc569acb8ce944e6b25	168	Pfam	PF00807	Apidaecin	116	142	4.4E-11	T	2025-03-10	IPR004828	Apidaecin
NP_001011613.1	6d6895b2e0a1bbc569acb8ce944e6b25	168	Pfam	PF00807	Apidaecin	32	60	7.4E-12	T	2025-03-10	IPR004828	Apidaecin
NP_001011613.1	6d6895b2e0a1bbc569acb8ce944e6b25	168	Pfam	PF00807	Apidaecin	142	168	1.4E-10	T	2025-03-10	IPR004828	Apidaecin
NP_001011613.1	6d6895b2e0a1bbc569acb8ce944e6b25	168	Pfam	PF00807	Apidaecin	88	116	1.3E-13	T	2025-03-10	IPR004828	Apidaecin
NP_001011613.1	6d6895b2e0a1bbc569acb8ce944e6b25	168	Pfam	PF00807	Apidaecin	60	88	1.9E-12	T	2025-03-10	IPR004828	Apidaecin
XP_026302039.1	06013ea3817b3da7fc6c67d9b903cef0	529	Pfam	PF00999	Sodium/hydrogen exchanger family	97	474	3.9E-28	T	2025-03-10	IPR006153	Cation/H+ exchanger
XP_026302037.1	33c417c24dd257d60ea0de936e85f117	621	Pfam	PF00999	Sodium/hydrogen exchanger family	189	566	6.4E-28	T	2025-03-10	IPR006153	Cation/H+ exchanger
XP_026302038.1	33c417c24dd257d60ea0de936e85f117	621	Pfam	PF00999	Sodium/hydrogen exchanger family	189	566	6.4E-28	T	2025-03-10	IPR006153	Cation/H+ exchanger
XP_026302036.1	33c417c24dd257d60ea0de936e85f117	621	Pfam	PF00999	Sodium/hydrogen exchanger family	189	566	6.4E-28	T	2025-03-10	IPR006153	Cation/H+ exchanger
XP_026302040.1	179d76277b781f568a30006b981a9f86	520	Pfam	PF00999	Sodium/hydrogen exchanger family	88	465	3.7E-28	T	2025-03-10	IPR006153	Cation/H+ exchanger
XP_026295626.1	318f88a133a374f68330c2e40719c55c	1289	Pfam	PF01094	Receptor family ligand binding region	54	413	1.1E-29	T	2025-03-10	IPR001828	Receptor, ligand binding region
XP_026295624.1	318f88a133a374f68330c2e40719c55c	1289	Pfam	PF01094	Receptor family ligand binding region	54	413	1.1E-29	T	2025-03-10	IPR001828	Receptor, ligand binding region
XP_026295625.1	318f88a133a374f68330c2e40719c55c	1289	Pfam	PF01094	Receptor family ligand binding region	54	413	1.1E-29	T	2025-03-10	IPR001828	Receptor, ligand binding region
XP_016766759.2	318f88a133a374f68330c2e40719c55c	1289	Pfam	PF01094	Receptor family ligand binding region	54	413	1.1E-29	T	2025-03-10	IPR001828	Receptor, ligand binding region
XP_006571493.1	306961cfecdb57f0f4c540ecc718d324	901	Pfam	PF01094	Receptor family ligand binding region	37	367	2.1E-34	T	2025-03-10	IPR001828	Receptor, ligand binding region
XP_006571492.1	306961cfecdb57f0f4c540ecc718d324	901	Pfam	PF01094	Receptor family ligand binding region	37	367	2.1E-34	T	2025-03-10	IPR001828	Receptor, ligand binding region
XP_016766386.1	7e2e27b9592159889862282ae941f934	895	Pfam	PF01094	Receptor family ligand binding region	37	367	2.1E-34	T	2025-03-10	IPR001828	Receptor, ligand binding region
XP_006565225.1	fb419af0244b5c0282f1f709cf19c9bb	537	Pfam	PF01130	CD36 family	21	485	2.0E-127	T	2025-03-10	IPR002159	CD36 family
XP_026300009.1	fb419af0244b5c0282f1f709cf19c9bb	537	Pfam	PF01130	CD36 family	21	485	2.0E-127	T	2025-03-10	IPR002159	CD36 family
XP_396085.3	fb419af0244b5c0282f1f709cf19c9bb	537	Pfam	PF01130	CD36 family	21	485	2.0E-127	T	2025-03-10	IPR002159	CD36 family
XP_006565224.1	fb419af0244b5c0282f1f709cf19c9bb	537	Pfam	PF01130	CD36 family	21	485	2.0E-127	T	2025-03-10	IPR002159	CD36 family
XP_016771066.1	77a90ba6f4cc550f156b45d36ab71b03	470	Pfam	PF01130	CD36 family	159	418	2.0E-66	T	2025-03-10	IPR002159	CD36 family
XP_016771066.1	77a90ba6f4cc550f156b45d36ab71b03	470	Pfam	PF01130	CD36 family	21	149	1.0E-36	T	2025-03-10	IPR002159	CD36 family
XP_397519.1	68faedf1aaa2c93a376e1208098a0f0f	298	Pfam	PF01347	Lipoprotein amino terminal region	80	272	8.8E-5	T	2025-03-10	IPR001747	Vitellogenin, N-terminal
XP_392231.4	903e0ee136777677d735308ba68f384a	334	Pfam	PF01347	Lipoprotein amino terminal region	44	248	2.2E-4	T	2025-03-10	IPR001747	Vitellogenin, N-terminal
XP_006561680.1	e288938675bb0b6e7e3611c50e2ddc86	1132	Pfam	PF01411	tRNA synthetases class II (A)	2	535	4.6E-191	T	2025-03-10	IPR018164	Alanyl-tRNA synthetase, class IIc, N-terminal
XP_395392.3	a90211be51ac6beffa34e00db0ee06e3	1194	Pfam	PF01411	tRNA synthetases class II (A)	9	597	1.1E-217	T	2025-03-10	IPR018164	Alanyl-tRNA synthetase, class IIc, N-terminal
NP_001229927.1	7d158a9924eea484fa4ecf5b5498dc56	424	Pfam	PF01414	Delta serrate ligand	65	91	0.0025	T	2025-03-10	IPR001774	Delta/Serrate/lag-2 (DSL) protein
NP_001155181.1	6da5c5b4fa19579868ca8a1af5370042	217	Pfam	PF01423	LSM domain	9	81	1.3E-16	T	2025-03-10	IPR001163	Sm domain, eukaryotic/archaea-type
XP_016771297.2	ac580ddca93f701bead6345471d1281e	1281	Pfam	PF01436	NHL repeat	1162	1187	0.0088	T	2025-03-10	IPR001258	NHL repeat
XP_016771297.2	ac580ddca93f701bead6345471d1281e	1281	Pfam	PF01436	NHL repeat	1257	1281	3.1E-5	T	2025-03-10	IPR001258	NHL repeat
XP_016771297.2	ac580ddca93f701bead6345471d1281e	1281	Pfam	PF01436	NHL repeat	1066	1092	0.14	T	2025-03-10	IPR001258	NHL repeat
XP_016771297.2	ac580ddca93f701bead6345471d1281e	1281	Pfam	PF01436	NHL repeat	1113	1140	2.1E-6	T	2025-03-10	IPR001258	NHL repeat
XP_016771297.2	ac580ddca93f701bead6345471d1281e	1281	Pfam	PF01436	NHL repeat	1207	1234	9.5E-5	T	2025-03-10	IPR001258	NHL repeat
XP_016771297.2	ac580ddca93f701bead6345471d1281e	1281	Pfam	PF01436	NHL repeat	1019	1046	5.5E-6	T	2025-03-10	IPR001258	NHL repeat
XP_016771298.2	cc7f43516631049540a6face09fa62ad	1239	Pfam	PF01436	NHL repeat	1165	1192	9.1E-5	T	2025-03-10	IPR001258	NHL repeat
XP_016771298.2	cc7f43516631049540a6face09fa62ad	1239	Pfam	PF01436	NHL repeat	977	1004	5.3E-6	T	2025-03-10	IPR001258	NHL repeat
XP_016771298.2	cc7f43516631049540a6face09fa62ad	1239	Pfam	PF01436	NHL repeat	1071	1098	2.1E-6	T	2025-03-10	IPR001258	NHL repeat
XP_016771298.2	cc7f43516631049540a6face09fa62ad	1239	Pfam	PF01436	NHL repeat	1215	1239	3.0E-5	T	2025-03-10	IPR001258	NHL repeat
XP_016771298.2	cc7f43516631049540a6face09fa62ad	1239	Pfam	PF01436	NHL repeat	1120	1145	0.0085	T	2025-03-10	IPR001258	NHL repeat
XP_016771298.2	cc7f43516631049540a6face09fa62ad	1239	Pfam	PF01436	NHL repeat	1024	1050	0.13	T	2025-03-10	IPR001258	NHL repeat
XP_026300672.1	f4a5dcc4bd9743188399f48db360f205	607	Pfam	PF01471	Putative peptidoglycan binding domain	2	49	0.0074	T	2025-03-10	IPR002477	Peptidoglycan binding-like
XP_026300596.1	d88a67b01d7bf161dfc35bd13695d898	642	Pfam	PF01471	Putative peptidoglycan binding domain	31	84	5.5E-6	T	2025-03-10	IPR002477	Peptidoglycan binding-like
XP_026300652.1	d88a67b01d7bf161dfc35bd13695d898	642	Pfam	PF01471	Putative peptidoglycan binding domain	31	84	5.5E-6	T	2025-03-10	IPR002477	Peptidoglycan binding-like
XP_006563337.2	d88a67b01d7bf161dfc35bd13695d898	642	Pfam	PF01471	Putative peptidoglycan binding domain	31	84	5.5E-6	T	2025-03-10	IPR002477	Peptidoglycan binding-like
XP_026300635.1	d88a67b01d7bf161dfc35bd13695d898	642	Pfam	PF01471	Putative peptidoglycan binding domain	31	84	5.5E-6	T	2025-03-10	IPR002477	Peptidoglycan binding-like
XP_396451.2	b83fcaac7d55ecc36f7712d5916f9cfe	468	Pfam	PF01490	Transmembrane amino acid transporter protein	62	456	1.1E-65	T	2025-03-10	IPR013057	Amino acid transporter, transmembrane domain
XP_391915.1	b2e66d15cc53fa13dd9eff3d530603dc	532	Pfam	PF01522	Polysaccharide deacetylase	190	304	2.8E-5	T	2025-03-10	IPR002509	NodB homology domain
XP_624655.3	ac13de724c325977d393f4b1375ba356	833	Pfam	PF01522	Polysaccharide deacetylase	498	610	1.9E-5	T	2025-03-10	IPR002509	NodB homology domain
XP_006566457.1	c5741882e657d1d5c3627927c1f5fff0	535	Pfam	PF01522	Polysaccharide deacetylase	190	307	0.0029	T	2025-03-10	IPR002509	NodB homology domain
XP_006566088.1	f42b53fd7e4d41aa45f163e53266ba25	833	Pfam	PF01522	Polysaccharide deacetylase	501	610	2.1E-6	T	2025-03-10	IPR002509	NodB homology domain
XP_026300349.1	aca285b83f93dbb993764852b5e3af87	350	Pfam	PF01586	Myogenic Basic domain	180	276	3.7E-8	T	2025-03-10	IPR002546	Myogenic muscle-specific protein, N-terminal
XP_016771986.2	59ca23d280dbcdbc1bf4f445624f5891	420	Pfam	PF01586	Myogenic Basic domain	180	276	2.6E-8	T	2025-03-10	IPR002546	Myogenic muscle-specific protein, N-terminal
XP_016771988.2	59ca23d280dbcdbc1bf4f445624f5891	420	Pfam	PF01586	Myogenic Basic domain	180	276	2.6E-8	T	2025-03-10	IPR002546	Myogenic muscle-specific protein, N-terminal
XP_016771992.2	98f6136829f593773d735352c38b9d8c	399	Pfam	PF01586	Myogenic Basic domain	180	276	4.0E-8	T	2025-03-10	IPR002546	Myogenic muscle-specific protein, N-terminal
XP_026300348.1	9bd6f45ca840305d3a031e423bf742eb	390	Pfam	PF01586	Myogenic Basic domain	197	246	5.6E-8	T	2025-03-10	IPR002546	Myogenic muscle-specific protein, N-terminal
XP_003251344.1	f420d8d42584e2fd23ae85ba317fdb0a	257	Pfam	PF01607	Chitin binding Peritrophin-A domain	34	85	4.4E-4	T	2025-03-10	IPR002557	Chitin binding domain
XP_003251344.1	f420d8d42584e2fd23ae85ba317fdb0a	257	Pfam	PF01607	Chitin binding Peritrophin-A domain	157	208	6.9E-8	T	2025-03-10	IPR002557	Chitin binding domain
XP_003251344.1	f420d8d42584e2fd23ae85ba317fdb0a	257	Pfam	PF01607	Chitin binding Peritrophin-A domain	104	151	3.5E-9	T	2025-03-10	IPR002557	Chitin binding domain
NP_001165860.1	dc565c4ebccfb8188f609adeb5a3b435	269	Pfam	PF01607	Chitin binding Peritrophin-A domain	170	219	6.0E-5	T	2025-03-10	IPR002557	Chitin binding domain
NP_001165860.1	dc565c4ebccfb8188f609adeb5a3b435	269	Pfam	PF01607	Chitin binding Peritrophin-A domain	93	144	2.1E-8	T	2025-03-10	IPR002557	Chitin binding domain
NP_001165860.1	dc565c4ebccfb8188f609adeb5a3b435	269	Pfam	PF01607	Chitin binding Peritrophin-A domain	23	78	3.2E-5	T	2025-03-10	IPR002557	Chitin binding domain
XP_006557598.1	e779140c320bf566750ecd0500367d5d	327	Pfam	PF01607	Chitin binding Peritrophin-A domain	139	192	4.5E-5	T	2025-03-10	IPR002557	Chitin binding domain
XP_391915.1	b2e66d15cc53fa13dd9eff3d530603dc	532	Pfam	PF01607	Chitin binding Peritrophin-A domain	54	95	2.3E-6	T	2025-03-10	IPR002557	Chitin binding domain
XP_624655.3	ac13de724c325977d393f4b1375ba356	833	Pfam	PF01607	Chitin binding Peritrophin-A domain	41	91	2.2E-10	T	2025-03-10	IPR002557	Chitin binding domain
NP_001167612.1	02335a59ff924eafbafebb784e747c37	322	Pfam	PF01607	Chitin binding Peritrophin-A domain	134	187	4.4E-5	T	2025-03-10	IPR002557	Chitin binding domain
XP_006569264.1	f68900eddf677b58054de199209b860b	239	Pfam	PF01607	Chitin binding Peritrophin-A domain	23	78	2.6E-5	T	2025-03-10	IPR002557	Chitin binding domain
XP_006569264.1	f68900eddf677b58054de199209b860b	239	Pfam	PF01607	Chitin binding Peritrophin-A domain	93	144	1.7E-8	T	2025-03-10	IPR002557	Chitin binding domain
XP_006569264.1	f68900eddf677b58054de199209b860b	239	Pfam	PF01607	Chitin binding Peritrophin-A domain	170	219	4.9E-5	T	2025-03-10	IPR002557	Chitin binding domain
NP_001165850.1	dc2ebef58877a6b79307d3d940086ba0	232	Pfam	PF01607	Chitin binding Peritrophin-A domain	101	149	1.3E-7	T	2025-03-10	IPR002557	Chitin binding domain
NP_001165850.1	dc2ebef58877a6b79307d3d940086ba0	232	Pfam	PF01607	Chitin binding Peritrophin-A domain	183	227	3.0E-4	T	2025-03-10	IPR002557	Chitin binding domain
NP_001165850.1	dc2ebef58877a6b79307d3d940086ba0	232	Pfam	PF01607	Chitin binding Peritrophin-A domain	31	86	6.1E-5	T	2025-03-10	IPR002557	Chitin binding domain
XP_623723.2	ce2beb5c953c85373efd5c771d9cf48e	549	Pfam	PF01607	Chitin binding Peritrophin-A domain	48	109	4.9E-5	T	2025-03-10	IPR002557	Chitin binding domain
XP_006566457.1	c5741882e657d1d5c3627927c1f5fff0	535	Pfam	PF01607	Chitin binding Peritrophin-A domain	54	95	2.4E-6	T	2025-03-10	IPR002557	Chitin binding domain
XP_006566458.1	9bc0f1dcca8d993271bd0e44a666adb5	543	Pfam	PF01607	Chitin binding Peritrophin-A domain	48	103	4.3E-6	T	2025-03-10	IPR002557	Chitin binding domain
XP_006566088.1	f42b53fd7e4d41aa45f163e53266ba25	833	Pfam	PF01607	Chitin binding Peritrophin-A domain	41	91	2.2E-10	T	2025-03-10	IPR002557	Chitin binding domain
XP_016770070.1	563526ee7ca233a1b4e0873d9286cdba	454	Pfam	PF01658	Myo-inositol-1-phosphate synthase	246	359	8.2E-34	T	2025-03-10	IPR013021	Myo-inositol-1-phosphate synthase, GAPDH-like
XP_623377.1	8b86f6ac841833c48d9d12a8cbbb1026	513	Pfam	PF01658	Myo-inositol-1-phosphate synthase	305	418	1.0E-33	T	2025-03-10	IPR013021	Myo-inositol-1-phosphate synthase, GAPDH-like
NP_001116485.2	4a92752bb544ee463900e696e10df459	1952	Pfam	PF02170	PAZ domain	914	1061	2.2E-13	T	2025-03-10	IPR003100	PAZ domain
XP_016767546.1	4a92752bb544ee463900e696e10df459	1952	Pfam	PF02170	PAZ domain	914	1061	2.2E-13	T	2025-03-10	IPR003100	PAZ domain
XP_006561680.1	e288938675bb0b6e7e3611c50e2ddc86	1132	Pfam	PF02272	DHHA1 domain	755	899	5.7E-11	T	2025-03-10	IPR003156	DHHA1 domain
XP_395392.3	a90211be51ac6beffa34e00db0ee06e3	1194	Pfam	PF02272	DHHA1 domain	817	961	6.2E-11	T	2025-03-10	IPR003156	DHHA1 domain
XP_393700.2	64d80e70f6d4f5e95107f408722543e7	1202	Pfam	PF02463	RecF/RecN/SMC N terminal domain	2	1181	5.3E-52	T	2025-03-10	IPR003395	RecF/RecN/SMC, N-terminal
XP_026298015.1	aa225d09235431dc0b7ca935d935058b	3564	Pfam	PF02494	HYR domain	1455	1539	2.6E-4	T	2025-03-10	IPR003410	HYR domain
XP_026298015.1	aa225d09235431dc0b7ca935d935058b	3564	Pfam	PF02494	HYR domain	1540	1623	2.0E-6	T	2025-03-10	IPR003410	HYR domain
XP_026298015.1	aa225d09235431dc0b7ca935d935058b	3564	Pfam	PF02494	HYR domain	2790	2869	8.4E-9	T	2025-03-10	IPR003410	HYR domain
XP_026298016.1	ddfd0987f0b0218187bdc8653b4179a6	3543	Pfam	PF02494	HYR domain	1455	1539	2.6E-4	T	2025-03-10	IPR003410	HYR domain
XP_026298016.1	ddfd0987f0b0218187bdc8653b4179a6	3543	Pfam	PF02494	HYR domain	1540	1623	2.0E-6	T	2025-03-10	IPR003410	HYR domain
XP_026298016.1	ddfd0987f0b0218187bdc8653b4179a6	3543	Pfam	PF02494	HYR domain	2790	2869	8.3E-9	T	2025-03-10	IPR003410	HYR domain
XP_006568215.3	420db28a13be62f9496c72b76343f92a	394	Pfam	PF02803	Thiolase, C-terminal domain	272	393	1.8E-45	T	2025-03-10	IPR020617	Thiolase, C-terminal
XP_394662.6	d1d93571eb821c18f1d46a5ef8d69b4a	335	Pfam	PF02866	lactate/malate dehydrogenase, alpha/beta C-terminal domain	166	328	2.4E-26	T	2025-03-10	IPR022383	Lactate/malate dehydrogenase, C-terminal
XP_006569462.1	c09f9c0cef356fd8676c29d95314df8c	332	Pfam	PF02866	lactate/malate dehydrogenase, alpha/beta C-terminal domain	163	325	2.3E-26	T	2025-03-10	IPR022383	Lactate/malate dehydrogenase, C-terminal
XP_003249130.2	902b2184f818dbb0423e74df8d3c68d0	389	Pfam	PF02958	Ecdysteroid kinase-like family	79	336	3.4E-36	T	2025-03-10	IPR004119	Ecdysteroid kinase-like
NP_001314876.1	754dabf112293f60a435223e5acf518a	509	Pfam	PF03015	Male sterility protein	372	464	4.5E-18	T	2025-03-10	IPR033640	Fatty acyl-CoA reductase, C-terminal
XP_026297083.1	220a3cb0df084345df8f0bf355b77b6b	409	Pfam	PF03015	Male sterility protein	279	370	6.7E-8	T	2025-03-10	IPR033640	Fatty acyl-CoA reductase, C-terminal
XP_624721.2	8bdf8806d5d834e92033f4326528d37b	499	Pfam	PF03062	MBOAT, membrane-bound O-acyltransferase family	122	412	1.5E-35	T	2025-03-10	IPR004299	Membrane bound O-acyl transferase, MBOAT
XP_006563003.1	dd983083988e1e2a129d03f5e188dde5	1607	Pfam	PF03098	Animal haem peroxidase	268	811	1.8E-196	T	2025-03-10	IPR019791	Haem peroxidase, animal-type
XP_026301491.1	77c43cc87cd8a194a562ac905fd877d9	1567	Pfam	PF03129	Anticodon binding domain	1355	1451	3.1E-12	T	2025-03-10	IPR004154	Anticodon-binding
XP_016766196.1	b765e0f010b13c4ce8be2028ce51394a	642	Pfam	PF03189	Otopetrin	198	621	1.2E-169	T	2025-03-10	IPR004878	Otopetrin
XP_016766194.1	9851cb44e782159eb0f8fd9645149dbe	751	Pfam	PF03189	Otopetrin	307	730	1.8E-169	T	2025-03-10	IPR004878	Otopetrin
XP_016766193.1	9851cb44e782159eb0f8fd9645149dbe	751	Pfam	PF03189	Otopetrin	307	730	1.8E-169	T	2025-03-10	IPR004878	Otopetrin
XP_016766195.1	9851cb44e782159eb0f8fd9645149dbe	751	Pfam	PF03189	Otopetrin	307	730	1.8E-169	T	2025-03-10	IPR004878	Otopetrin
XP_003251293.1	32c0231875894601f4fb4241f850e03a	750	Pfam	PF03189	Otopetrin	306	729	1.8E-169	T	2025-03-10	IPR004878	Otopetrin
NP_001116485.2	4a92752bb544ee463900e696e10df459	1952	Pfam	PF03368	Dicer dimerisation domain	623	714	3.3E-22	T	2025-03-10	IPR005034	Dicer dimerisation domain
XP_016767546.1	4a92752bb544ee463900e696e10df459	1952	Pfam	PF03368	Dicer dimerisation domain	623	714	3.3E-22	T	2025-03-10	IPR005034	Dicer dimerisation domain
NP_001011600.1	2ed064cc36000d31630ebdcca00ee48b	683	Pfam	PF03722	Hemocyanin, all-alpha domain	32	153	2.5E-40	T	2025-03-10	IPR005204	Hemocyanin, N-terminal
NP_001011600.1	2ed064cc36000d31630ebdcca00ee48b	683	Pfam	PF03723	Hemocyanin, ig-like domain	437	673	5.3E-81	T	2025-03-10	IPR005203	Hemocyanin, C-terminal
XP_016768041.1	381aa32bf5c11bfa418de61c3748c2aa	775	Pfam	PF03920	Groucho/TLE N-terminal Q-rich domain	10	134	4.1E-59	T	2025-03-10	IPR005617	Groucho/TLE, N-terminal Q-rich domain
XP_394649.3	6d48bc2f16c9e337fc9024b71c19d7f2	796	Pfam	PF03920	Groucho/TLE N-terminal Q-rich domain	31	155	4.3E-59	T	2025-03-10	IPR005617	Groucho/TLE, N-terminal Q-rich domain
XP_026301491.1	77c43cc87cd8a194a562ac905fd877d9	1567	Pfam	PF03950	tRNA synthetases class I (E and Q), anti-codon binding domain	522	607	1.7E-12	T	2025-03-10	IPR020059	Glutamyl/glutaminyl-tRNA synthetase, class Ib, anti-codon binding domain
XP_006559578.1	04506e47374b36489568c1d9aaff437d	203	Pfam	PF04117	Mpv17 / PMP22 family	133	194	1.4E-17	T	2025-03-10	IPR007248	Mpv17/PMP22
XP_026298358.1	79c644ab26e4f459af8e282e15a4bd41	210	Pfam	PF04117	Mpv17 / PMP22 family	133	194	1.5E-17	T	2025-03-10	IPR007248	Mpv17/PMP22
XP_623933.1	95beded37672581833da10df0cae3eda	471	Pfam	PF04137	Endoplasmic Reticulum Oxidoreductin 1 (ERO1)	64	461	9.9E-123	T	2025-03-10	IPR007266	Endoplasmic reticulum oxidoreductin 1
XP_026298578.1	425fa73ebd2477b9780fa040a1ad20ea	1377	Pfam	PF04423	Rad50 zinc hook motif	669	714	4	T	2025-03-10	IPR013134	RAD50, zinc hook
XP_026300177.1	9c31e23877456fa506441fcb0fda01b4	1060	Pfam	PF04547	Calcium-activated chloride channel	409	983	8.8E-159	T	2025-03-10	IPR049452	Anoctamin, transmembrane domain
XP_026300178.1	9c31e23877456fa506441fcb0fda01b4	1060	Pfam	PF04547	Calcium-activated chloride channel	409	983	8.8E-159	T	2025-03-10	IPR049452	Anoctamin, transmembrane domain
XP_026300180.1	6a514226251f036c0536816ab3fa1c3b	1014	Pfam	PF04547	Calcium-activated chloride channel	409	937	7.8E-148	T	2025-03-10	IPR049452	Anoctamin, transmembrane domain
XP_026300179.1	9ba18f61dc98d25e8a15f840c25597fb	1055	Pfam	PF04547	Calcium-activated chloride channel	404	978	8.7E-159	T	2025-03-10	IPR049452	Anoctamin, transmembrane domain
XP_006562250.1	13c6cdff3789c174bfeb0f9fdba5b6af	577	Pfam	PF04712	Radial spokehead-like protein	25	543	4.1E-181	T	2025-03-10	IPR006802	Radial spokehead-like protein
XP_016767956.1	2c85a394628c933b32dd7933f8b170ad	493	Pfam	PF04712	Radial spokehead-like protein	3	459	2.1E-155	T	2025-03-10	IPR006802	Radial spokehead-like protein
XP_016767955.1	2c85a394628c933b32dd7933f8b170ad	493	Pfam	PF04712	Radial spokehead-like protein	3	459	2.1E-155	T	2025-03-10	IPR006802	Radial spokehead-like protein
XP_016770896.2	7da5a7e060398752422a66fd4a7e9c00	1255	Pfam	PF04931	DNA polymerase phi	68	816	1.2E-117	T	2025-03-10	IPR007015	DNA polymerase V/Myb-binding protein 1A
XP_006565044.2	ca6c66d840d0a256db85088ebe878bea	632	Pfam	PF05199	GMC oxidoreductase	463	604	6.8E-35	T	2025-03-10	IPR007867	Glucose-methanol-choline oxidoreductase, C-terminal
XP_003250569.2	ca6c66d840d0a256db85088ebe878bea	632	Pfam	PF05199	GMC oxidoreductase	463	604	6.8E-35	T	2025-03-10	IPR007867	Glucose-methanol-choline oxidoreductase, C-terminal
XP_006572092.1	66941f376367f7b21db879d07768b5e9	364	Pfam	PF05335	Protein of unknown function (DUF745)	77	251	3.4E-33	T	2025-03-10	IPR007999	Protein of unknown function DUF745
XP_016770700.1	a64a4712c144b181a7ae4e01f0963388	558	Pfam	PF05920	Homeobox KN domain	177	216	1.5E-13	T	2025-03-10	IPR008422	KN homeodomain
XP_016770698.1	99dea4e1ff7f4017b1b8b1b145997e4b	666	Pfam	PF05920	Homeobox KN domain	285	324	1.8E-13	T	2025-03-10	IPR008422	KN homeodomain
XP_006559002.1	99dea4e1ff7f4017b1b8b1b145997e4b	666	Pfam	PF05920	Homeobox KN domain	285	324	1.8E-13	T	2025-03-10	IPR008422	KN homeodomain
XP_026299437.1	ba340c191a1e5632f34129f4ff709e8a	524	Pfam	PF05920	Homeobox KN domain	86	125	1.3E-13	T	2025-03-10	IPR008422	KN homeodomain
XP_006559003.1	a8bb2a8fa748cffeccb9de5a59284976	627	Pfam	PF05920	Homeobox KN domain	246	285	1.7E-13	T	2025-03-10	IPR008422	KN homeodomain
XP_006559001.1	981b62471c984926b76197b813750faa	656	Pfam	PF05920	Homeobox KN domain	218	257	1.7E-13	T	2025-03-10	IPR008422	KN homeodomain
XP_026299436.1	2a8063ab016077aa3103cdcac70e5d35	571	Pfam	PF05920	Homeobox KN domain	133	172	1.4E-13	T	2025-03-10	IPR008422	KN homeodomain
XP_396292.3	962ffc2a80126084f55ae4b5fe7ee8a5	677	Pfam	PF05920	Homeobox KN domain	239	278	1.7E-13	T	2025-03-10	IPR008422	KN homeodomain
XP_026299506.1	7d25b0b38457145d4f2e78e94ca39404	622	Pfam	PF05920	Homeobox KN domain	241	280	1.7E-13	T	2025-03-10	IPR008422	KN homeodomain
XP_396291.3	7d25b0b38457145d4f2e78e94ca39404	622	Pfam	PF05920	Homeobox KN domain	241	280	1.7E-13	T	2025-03-10	IPR008422	KN homeodomain
XP_026299507.1	7d25b0b38457145d4f2e78e94ca39404	622	Pfam	PF05920	Homeobox KN domain	241	280	1.7E-13	T	2025-03-10	IPR008422	KN homeodomain
XP_026299505.1	7d25b0b38457145d4f2e78e94ca39404	622	Pfam	PF05920	Homeobox KN domain	241	280	1.7E-13	T	2025-03-10	IPR008422	KN homeodomain
XP_016769783.2	a84f7952936db55693d673f45d4489f4	1563	Pfam	PF06427	UDP-glucose:Glycoprotein Glucosyltransferase	1129	1235	1.1E-33	T	2025-03-10	IPR009448	UDP-glucose:Glycoprotein Glucosyltransferase
XP_026299043.1	0404ed3f91f8cb12516dfaa5e0070eaf	1255	Pfam	PF06427	UDP-glucose:Glycoprotein Glucosyltransferase	1129	1235	8.2E-34	T	2025-03-10	IPR009448	UDP-glucose:Glycoprotein Glucosyltransferase
XP_393700.2	64d80e70f6d4f5e95107f408722543e7	1202	Pfam	PF06470	SMC proteins Flexible Hinge Domain	531	643	1.5E-20	T	2025-03-10	IPR010935	SMCs flexible hinge
XP_026301545.1	5c4ef10545bd1864e3e2fe52bb957d7d	458	Pfam	PF07525	SOCS box	416	454	1.9E-4	T	2025-03-10	IPR001496	SOCS box domain
XP_006557342.1	4b623da35dc8b86e93181bc470f71b67	418	Pfam	PF07525	SOCS box	376	414	1.7E-4	T	2025-03-10	IPR001496	SOCS box domain
XP_397331.2	0543ffb435093bda85e64f8c5b3bbf09	469	Pfam	PF07525	SOCS box	427	465	1.9E-4	T	2025-03-10	IPR001496	SOCS box domain
XP_001121958.1	28e5cd061366caea9ca428fadd274ff8	400	Pfam	PF07527	Hairy Orange	161	200	2.6E-7	T	2025-03-10	IPR003650	Orange domain
XP_026300266.1	28e5cd061366caea9ca428fadd274ff8	400	Pfam	PF07527	Hairy Orange	161	200	2.6E-7	T	2025-03-10	IPR003650	Orange domain
XP_006566912.2	a5cfadf81f36b5a43d49028ccf081f1c	468	Pfam	PF07527	Hairy Orange	229	268	3.2E-7	T	2025-03-10	IPR003650	Orange domain
XP_016771007.1	d65771410c4500914dbda54b33805996	420	Pfam	PF07527	Hairy Orange	181	220	2.7E-7	T	2025-03-10	IPR003650	Orange domain
XP_006566914.1	96496ef0cd1a147e22923885b594edcc	374	Pfam	PF07527	Hairy Orange	135	174	2.3E-7	T	2025-03-10	IPR003650	Orange domain
XP_026300267.1	6d25fc87a7ca5ae234e5522e141e4ae7	366	Pfam	PF07527	Hairy Orange	127	166	2.3E-7	T	2025-03-10	IPR003650	Orange domain
XP_026299939.1	6288797d125f656a988a0476c3e73dff	292	Pfam	PF07545	Vestigial/Tondu family	153	183	3.0E-13	T	2025-03-10	IPR011520	Vestigial family
XP_026299938.1	cf8e686bb28cea402815bd149900a448	315	Pfam	PF07545	Vestigial/Tondu family	153	183	3.4E-13	T	2025-03-10	IPR011520	Vestigial family
XP_001122002.2	cf8e686bb28cea402815bd149900a448	315	Pfam	PF07545	Vestigial/Tondu family	153	183	3.4E-13	T	2025-03-10	IPR011520	Vestigial family
XP_016771048.1	855c5bc3fbda9895508d48979a1a6301	267	Pfam	PF07545	Vestigial/Tondu family	105	135	2.7E-13	T	2025-03-10	IPR011520	Vestigial family
XP_016771047.1	d0bdadf27ff529191aeb426544645568	313	Pfam	PF07545	Vestigial/Tondu family	151	181	3.3E-13	T	2025-03-10	IPR011520	Vestigial family
XP_026298015.1	aa225d09235431dc0b7ca935d935058b	3564	Pfam	PF07645	Calcium-binding EGF domain	976	1009	0.0046	T	2025-03-10	IPR049883	NOTCH1 EGF-like calcium-binding domain
XP_026298015.1	aa225d09235431dc0b7ca935d935058b	3564	Pfam	PF07645	Calcium-binding EGF domain	783	815	5.5E-4	T	2025-03-10	IPR049883	NOTCH1 EGF-like calcium-binding domain
XP_026298016.1	ddfd0987f0b0218187bdc8653b4179a6	3543	Pfam	PF07645	Calcium-binding EGF domain	783	815	5.4E-4	T	2025-03-10	IPR049883	NOTCH1 EGF-like calcium-binding domain
XP_026298016.1	ddfd0987f0b0218187bdc8653b4179a6	3543	Pfam	PF07645	Calcium-binding EGF domain	976	1009	0.0046	T	2025-03-10	IPR049883	NOTCH1 EGF-like calcium-binding domain
XP_016772082.1	6568fade21af857356a88a63221e1add	119	Pfam	PF07648	Kazal-type serine protease inhibitor domain	59	110	0.14	T	2025-03-10	IPR002350	Kazal domain
XP_006560774.1	5fb05779f1bc973c17dbedc0e9ad67aa	880	Pfam	PF07679	Immunoglobulin I-set domain	365	449	7.5E-8	T	2025-03-10	IPR013098	Immunoglobulin I-set
XP_026296803.1	e9784f6e9b7d2d1c9e58b0f5f6346045	719	Pfam	PF07679	Immunoglobulin I-set domain	365	449	5.7E-8	T	2025-03-10	IPR013098	Immunoglobulin I-set
XP_396311.4	16a2967d55c6b8ece912d683a02e11ec	911	Pfam	PF07679	Immunoglobulin I-set domain	365	449	7.8E-8	T	2025-03-10	IPR013098	Immunoglobulin I-set
XP_006560774.1	5fb05779f1bc973c17dbedc0e9ad67aa	880	Pfam	PF07686	Immunoglobulin V-set domain	42	149	5.2E-6	T	2025-03-10	IPR013106	Immunoglobulin V-set domain
XP_026296803.1	e9784f6e9b7d2d1c9e58b0f5f6346045	719	Pfam	PF07686	Immunoglobulin V-set domain	42	149	3.8E-6	T	2025-03-10	IPR013106	Immunoglobulin V-set domain
XP_396311.4	16a2967d55c6b8ece912d683a02e11ec	911	Pfam	PF07686	Immunoglobulin V-set domain	42	149	5.4E-6	T	2025-03-10	IPR013106	Immunoglobulin V-set domain
XP_006562223.2	47dca47574f269f43b96bd0eb2a6770c	716	Pfam	PF07690	Major Facilitator Superfamily	107	292	1.5E-18	T	2025-03-10	IPR011701	Major facilitator superfamily
XP_006562223.2	47dca47574f269f43b96bd0eb2a6770c	716	Pfam	PF07690	Major Facilitator Superfamily	524	707	3.5E-7	T	2025-03-10	IPR011701	Major facilitator superfamily
XP_016767727.2	05abf6e57e3bae4d6a826e62ec10c854	587	Pfam	PF07690	Major Facilitator Superfamily	395	578	2.2E-7	T	2025-03-10	IPR011701	Major facilitator superfamily
XP_016767727.2	05abf6e57e3bae4d6a826e62ec10c854	587	Pfam	PF07690	Major Facilitator Superfamily	94	163	6.3E-5	T	2025-03-10	IPR011701	Major facilitator superfamily
XP_006562224.2	66980de9c0daadc9efaac2955acbb660	670	Pfam	PF07690	Major Facilitator Superfamily	478	661	4.0E-7	T	2025-03-10	IPR011701	Major facilitator superfamily
XP_006562224.2	66980de9c0daadc9efaac2955acbb660	670	Pfam	PF07690	Major Facilitator Superfamily	61	246	1.4E-18	T	2025-03-10	IPR011701	Major facilitator superfamily
XP_016767725.2	66980de9c0daadc9efaac2955acbb660	670	Pfam	PF07690	Major Facilitator Superfamily	478	661	4.0E-7	T	2025-03-10	IPR011701	Major facilitator superfamily
XP_016767725.2	66980de9c0daadc9efaac2955acbb660	670	Pfam	PF07690	Major Facilitator Superfamily	61	246	1.4E-18	T	2025-03-10	IPR011701	Major facilitator superfamily
XP_016767724.2	66980de9c0daadc9efaac2955acbb660	670	Pfam	PF07690	Major Facilitator Superfamily	478	661	4.0E-7	T	2025-03-10	IPR011701	Major facilitator superfamily
XP_016767724.2	66980de9c0daadc9efaac2955acbb660	670	Pfam	PF07690	Major Facilitator Superfamily	61	246	1.4E-18	T	2025-03-10	IPR011701	Major facilitator superfamily
XP_016767723.2	66980de9c0daadc9efaac2955acbb660	670	Pfam	PF07690	Major Facilitator Superfamily	478	661	4.0E-7	T	2025-03-10	IPR011701	Major facilitator superfamily
XP_016767723.2	66980de9c0daadc9efaac2955acbb660	670	Pfam	PF07690	Major Facilitator Superfamily	61	246	1.4E-18	T	2025-03-10	IPR011701	Major facilitator superfamily
XP_006562225.2	66980de9c0daadc9efaac2955acbb660	670	Pfam	PF07690	Major Facilitator Superfamily	478	661	4.0E-7	T	2025-03-10	IPR011701	Major facilitator superfamily
XP_006562225.2	66980de9c0daadc9efaac2955acbb660	670	Pfam	PF07690	Major Facilitator Superfamily	61	246	1.4E-18	T	2025-03-10	IPR011701	Major facilitator superfamily
XP_016767726.2	66980de9c0daadc9efaac2955acbb660	670	Pfam	PF07690	Major Facilitator Superfamily	478	661	4.0E-7	T	2025-03-10	IPR011701	Major facilitator superfamily
XP_016767726.2	66980de9c0daadc9efaac2955acbb660	670	Pfam	PF07690	Major Facilitator Superfamily	61	246	1.4E-18	T	2025-03-10	IPR011701	Major facilitator superfamily
XP_006562228.2	66980de9c0daadc9efaac2955acbb660	670	Pfam	PF07690	Major Facilitator Superfamily	478	661	4.0E-7	T	2025-03-10	IPR011701	Major facilitator superfamily
XP_006562228.2	66980de9c0daadc9efaac2955acbb660	670	Pfam	PF07690	Major Facilitator Superfamily	61	246	1.4E-18	T	2025-03-10	IPR011701	Major facilitator superfamily
XP_394396.2	e956dc88110db6670177e70b91cca3ec	508	Pfam	PF07690	Major Facilitator Superfamily	88	441	9.0E-49	T	2025-03-10	IPR011701	Major facilitator superfamily
XP_026298015.1	aa225d09235431dc0b7ca935d935058b	3564	Pfam	PF07699	Tyrosine-protein kinase ephrin type A/B receptor-like	1854	1901	4.9E-12	T	2025-03-10	IPR011641	Tyrosine-protein kinase ephrin type A/B receptor-like
XP_026298015.1	aa225d09235431dc0b7ca935d935058b	3564	Pfam	PF07699	Tyrosine-protein kinase ephrin type A/B receptor-like	3125	3176	2.6E-9	T	2025-03-10	IPR011641	Tyrosine-protein kinase ephrin type A/B receptor-like
XP_026298015.1	aa225d09235431dc0b7ca935d935058b	3564	Pfam	PF07699	Tyrosine-protein kinase ephrin type A/B receptor-like	3244	3283	4.2E-7	T	2025-03-10	IPR011641	Tyrosine-protein kinase ephrin type A/B receptor-like
XP_026298015.1	aa225d09235431dc0b7ca935d935058b	3564	Pfam	PF07699	Tyrosine-protein kinase ephrin type A/B receptor-like	3291	3338	1.0E-9	T	2025-03-10	IPR011641	Tyrosine-protein kinase ephrin type A/B receptor-like
XP_026298015.1	aa225d09235431dc0b7ca935d935058b	3564	Pfam	PF07699	Tyrosine-protein kinase ephrin type A/B receptor-like	1908	1958	8.1E-6	T	2025-03-10	IPR011641	Tyrosine-protein kinase ephrin type A/B receptor-like
XP_026298015.1	aa225d09235431dc0b7ca935d935058b	3564	Pfam	PF07699	Tyrosine-protein kinase ephrin type A/B receptor-like	3183	3230	3.5E-9	T	2025-03-10	IPR011641	Tyrosine-protein kinase ephrin type A/B receptor-like
XP_026298015.1	aa225d09235431dc0b7ca935d935058b	3564	Pfam	PF07699	Tyrosine-protein kinase ephrin type A/B receptor-like	1965	2012	2.6E-10	T	2025-03-10	IPR011641	Tyrosine-protein kinase ephrin type A/B receptor-like
XP_026298016.1	ddfd0987f0b0218187bdc8653b4179a6	3543	Pfam	PF07699	Tyrosine-protein kinase ephrin type A/B receptor-like	3162	3209	3.5E-9	T	2025-03-10	IPR011641	Tyrosine-protein kinase ephrin type A/B receptor-like
XP_026298016.1	ddfd0987f0b0218187bdc8653b4179a6	3543	Pfam	PF07699	Tyrosine-protein kinase ephrin type A/B receptor-like	3223	3262	4.2E-7	T	2025-03-10	IPR011641	Tyrosine-protein kinase ephrin type A/B receptor-like
XP_026298016.1	ddfd0987f0b0218187bdc8653b4179a6	3543	Pfam	PF07699	Tyrosine-protein kinase ephrin type A/B receptor-like	1854	1901	4.9E-12	T	2025-03-10	IPR011641	Tyrosine-protein kinase ephrin type A/B receptor-like
XP_026298016.1	ddfd0987f0b0218187bdc8653b4179a6	3543	Pfam	PF07699	Tyrosine-protein kinase ephrin type A/B receptor-like	3270	3317	1.0E-9	T	2025-03-10	IPR011641	Tyrosine-protein kinase ephrin type A/B receptor-like
XP_026298016.1	ddfd0987f0b0218187bdc8653b4179a6	3543	Pfam	PF07699	Tyrosine-protein kinase ephrin type A/B receptor-like	1908	1958	8.0E-6	T	2025-03-10	IPR011641	Tyrosine-protein kinase ephrin type A/B receptor-like
XP_026298016.1	ddfd0987f0b0218187bdc8653b4179a6	3543	Pfam	PF07699	Tyrosine-protein kinase ephrin type A/B receptor-like	3104	3155	2.6E-9	T	2025-03-10	IPR011641	Tyrosine-protein kinase ephrin type A/B receptor-like
XP_026298016.1	ddfd0987f0b0218187bdc8653b4179a6	3543	Pfam	PF07699	Tyrosine-protein kinase ephrin type A/B receptor-like	1965	2012	2.6E-10	T	2025-03-10	IPR011641	Tyrosine-protein kinase ephrin type A/B receptor-like
XP_026295626.1	318f88a133a374f68330c2e40719c55c	1289	Pfam	PF07701	Heme NO binding associated	838	880	14	T	2025-03-10	IPR011645	Haem NO binding associated
XP_026295624.1	318f88a133a374f68330c2e40719c55c	1289	Pfam	PF07701	Heme NO binding associated	838	880	14	T	2025-03-10	IPR011645	Haem NO binding associated
XP_026295625.1	318f88a133a374f68330c2e40719c55c	1289	Pfam	PF07701	Heme NO binding associated	838	880	14	T	2025-03-10	IPR011645	Haem NO binding associated
XP_016766759.2	318f88a133a374f68330c2e40719c55c	1289	Pfam	PF07701	Heme NO binding associated	838	880	14	T	2025-03-10	IPR011645	Haem NO binding associated
XP_026295626.1	318f88a133a374f68330c2e40719c55c	1289	Pfam	PF07714	Protein tyrosine and serine/threonine kinase	576	820	1.1E-35	T	2025-03-10	IPR001245	Serine-threonine/tyrosine-protein kinase, catalytic domain
XP_026295624.1	318f88a133a374f68330c2e40719c55c	1289	Pfam	PF07714	Protein tyrosine and serine/threonine kinase	576	820	1.1E-35	T	2025-03-10	IPR001245	Serine-threonine/tyrosine-protein kinase, catalytic domain
XP_026295625.1	318f88a133a374f68330c2e40719c55c	1289	Pfam	PF07714	Protein tyrosine and serine/threonine kinase	576	820	1.1E-35	T	2025-03-10	IPR001245	Serine-threonine/tyrosine-protein kinase, catalytic domain
XP_016766759.2	318f88a133a374f68330c2e40719c55c	1289	Pfam	PF07714	Protein tyrosine and serine/threonine kinase	576	820	1.1E-35	T	2025-03-10	IPR001245	Serine-threonine/tyrosine-protein kinase, catalytic domain
XP_006567267.1	f37b16938a895d96e457b7b180ee8569	539	Pfam	PF07719	Tetratricopeptide repeat	428	460	0.15	T	2025-03-10	IPR013105	Tetratricopeptide repeat 2
XP_395748.2	219216aa4255514265d5d6a51e6f5106	459	Pfam	PF07719	Tetratricopeptide repeat	301	332	0.15	T	2025-03-10	IPR013105	Tetratricopeptide repeat 2
XP_016768023.1	219216aa4255514265d5d6a51e6f5106	459	Pfam	PF07719	Tetratricopeptide repeat	301	332	0.15	T	2025-03-10	IPR013105	Tetratricopeptide repeat 2
XP_006562317.1	34be90481a5060900892dc76e8a7f226	747	Pfam	PF07731	Multicopper oxidase	580	711	2.3E-26	T	2025-03-10	IPR011706	Multicopper oxidase, C-terminal
XP_006562317.1	34be90481a5060900892dc76e8a7f226	747	Pfam	PF07732	Multicopper oxidase	180	291	1.6E-32	T	2025-03-10	IPR011707	Multicopper oxidase-like, N-terminal
XP_006561050.1	055c8a462d11bdd5b93127b5812227e0	276	Pfam	PF07898	Protein of unknown function (DUF1676)	48	212	1.3E-5	T	2025-03-10	IPR012464	Protein of unknown function DUF1676
XP_006561680.1	e288938675bb0b6e7e3611c50e2ddc86	1132	Pfam	PF07973	Threonyl and Alanyl tRNA synthetase second additional domain	634	692	3.2E-10	T	2025-03-10	IPR012947	Threonyl/alanyl tRNA synthetase, SAD
XP_395392.3	a90211be51ac6beffa34e00db0ee06e3	1194	Pfam	PF07973	Threonyl and Alanyl tRNA synthetase second additional domain	696	754	3.4E-10	T	2025-03-10	IPR012947	Threonyl/alanyl tRNA synthetase, SAD
NP_001314876.1	754dabf112293f60a435223e5acf518a	509	Pfam	PF07993	Male sterility protein	27	297	8.9E-69	T	2025-03-10	IPR013120	Fatty acyl-coenzyme A reductase-like, NAD-binding domain
XP_026297083.1	220a3cb0df084345df8f0bf355b77b6b	409	Pfam	PF07993	Male sterility protein	14	127	2.5E-14	T	2025-03-10	IPR013120	Fatty acyl-coenzyme A reductase-like, NAD-binding domain
XP_016770070.1	563526ee7ca233a1b4e0873d9286cdba	454	Pfam	PF07994	Myo-inositol-1-phosphate synthase	1	431	1.3E-139	T	2025-03-10	IPR002587	Myo-inositol-1-phosphate synthase
XP_623377.1	8b86f6ac841833c48d9d12a8cbbb1026	513	Pfam	PF07994	Myo-inositol-1-phosphate synthase	57	490	3.0E-141	T	2025-03-10	IPR002587	Myo-inositol-1-phosphate synthase
NP_001011617.1	e45beef8b9294cfcc202127104c14623	53	Pfam	PF08026	Bee antimicrobial peptide	21	51	4.2E-13	T	2025-03-10	IPR012524	Abaecin, antimicrobial peptide
XP_006560774.1	5fb05779f1bc973c17dbedc0e9ad67aa	880	Pfam	PF08205	CD80-like C2-set immunoglobulin domain	268	339	6.5E-6	T	2025-03-10	IPR013162	CD80-like, immunoglobulin C2-set
XP_026296803.1	e9784f6e9b7d2d1c9e58b0f5f6346045	719	Pfam	PF08205	CD80-like C2-set immunoglobulin domain	268	339	5.0E-6	T	2025-03-10	IPR013162	CD80-like, immunoglobulin C2-set
XP_396311.4	16a2967d55c6b8ece912d683a02e11ec	911	Pfam	PF08205	CD80-like C2-set immunoglobulin domain	268	339	6.8E-6	T	2025-03-10	IPR013162	CD80-like, immunoglobulin C2-set
XP_006567264.1	07eb7989c5efb86f96872857f4665ed0	796	Pfam	PF08409	Protein O-mannosyl-transferase TMTC, DUF1736	239	311	1.5E-23	T	2025-03-10	IPR013618	Protein O-mannosyl-transferase TMTC, DUF1736
XP_006567266.1	f651a60fb441394bcec6fa368e2598d4	708	Pfam	PF08409	Protein O-mannosyl-transferase TMTC, DUF1736	239	311	1.3E-23	T	2025-03-10	IPR013618	Protein O-mannosyl-transferase TMTC, DUF1736
XP_006567263.1	cfa7af442ef7e14613aa573e4e8ecec9	818	Pfam	PF08409	Protein O-mannosyl-transferase TMTC, DUF1736	214	286	1.5E-23	T	2025-03-10	IPR013618	Protein O-mannosyl-transferase TMTC, DUF1736
XP_392318.4	df1e4552ded25ffd6b3c1b86ca8577cb	843	Pfam	PF08409	Protein O-mannosyl-transferase TMTC, DUF1736	239	311	1.6E-23	T	2025-03-10	IPR013618	Protein O-mannosyl-transferase TMTC, DUF1736
XP_006568175.2	76489bd799644daaab81c415fd102de4	405	Pfam	PF08544	GHMP kinases C terminal	302	376	3.7E-11	T	2025-03-10	IPR013750	GHMP kinase, C-terminal domain
XP_006568174.2	76489bd799644daaab81c415fd102de4	405	Pfam	PF08544	GHMP kinases C terminal	302	376	3.7E-11	T	2025-03-10	IPR013750	GHMP kinase, C-terminal domain
XP_016772811.2	76489bd799644daaab81c415fd102de4	405	Pfam	PF08544	GHMP kinases C terminal	302	376	3.7E-11	T	2025-03-10	IPR013750	GHMP kinase, C-terminal domain
XP_006568173.2	cb606086bc659d9c5bedcd1c9ceb017d	474	Pfam	PF08544	GHMP kinases C terminal	371	445	4.8E-11	T	2025-03-10	IPR013750	GHMP kinase, C-terminal domain
XP_006568172.2	cb606086bc659d9c5bedcd1c9ceb017d	474	Pfam	PF08544	GHMP kinases C terminal	371	445	4.8E-11	T	2025-03-10	IPR013750	GHMP kinase, C-terminal domain
XP_026301491.1	77c43cc87cd8a194a562ac905fd877d9	1567	Pfam	PF09180	Prolyl-tRNA synthetase, C-terminal	1483	1567	5.3E-16	T	2025-03-10	IPR016061	Proline-tRNA ligase, class II, C-terminal
XP_026297051.1	4473d4b5e112630c665b4d521e7c854a	1279	Pfam	PF09382	RQC domain	976	1095	1.8E-16	T	2025-03-10	IPR018982	RQC domain
XP_026297050.1	540199baa76f27aedf7d11201377a235	1348	Pfam	PF09382	RQC domain	1045	1164	1.9E-16	T	2025-03-10	IPR018982	RQC domain
XP_006568173.2	cb606086bc659d9c5bedcd1c9ceb017d	474	Pfam	PF10509	Galactokinase galactose-binding signature	34	81	4.0E-17	T	2025-03-10	IPR019539	Galactokinase, N-terminal domain
XP_006568172.2	cb606086bc659d9c5bedcd1c9ceb017d	474	Pfam	PF10509	Galactokinase galactose-binding signature	34	81	4.0E-17	T	2025-03-10	IPR019539	Galactokinase, N-terminal domain
XP_006571493.1	306961cfecdb57f0f4c540ecc718d324	901	Pfam	PF10613	Ligated ion channel L-glutamate- and glycine-binding site	407	521	1.0E-38	T	2025-03-10	IPR019594	Ionotropic glutamate receptor, L-glutamate and glycine-binding domain
XP_006571492.1	306961cfecdb57f0f4c540ecc718d324	901	Pfam	PF10613	Ligated ion channel L-glutamate- and glycine-binding site	407	521	1.0E-38	T	2025-03-10	IPR019594	Ionotropic glutamate receptor, L-glutamate and glycine-binding domain
XP_016766386.1	7e2e27b9592159889862282ae941f934	895	Pfam	PF10613	Ligated ion channel L-glutamate- and glycine-binding site	407	521	1.0E-38	T	2025-03-10	IPR019594	Ionotropic glutamate receptor, L-glutamate and glycine-binding domain
NP_001257761.1	1c164ecc0730b71e209b20164c4b2c4f	172	Pfam	PF11018	Pupal cuticle protein C1	53	154	2.8E-8	T	2025-03-10	IPR022727	Pupal cuticle protein C1
XP_392862.3	c49a29c5bd8a28f72cffc0b3e8c5e5fa	1285	Pfam	PF11830	Domain of unknown function (DUF3350)	585	621	3.2E-10	T	2025-03-10	IPR021785	Domain of unknown function DUF3350
XP_006560524.1	a4b2963dea96ab4a6d57245825daefc3	1249	Pfam	PF11830	Domain of unknown function (DUF3350)	549	585	3.0E-10	T	2025-03-10	IPR021785	Domain of unknown function DUF3350
XP_006560522.1	a4b2963dea96ab4a6d57245825daefc3	1249	Pfam	PF11830	Domain of unknown function (DUF3350)	549	585	3.0E-10	T	2025-03-10	IPR021785	Domain of unknown function DUF3350
XP_016766910.1	a4b2963dea96ab4a6d57245825daefc3	1249	Pfam	PF11830	Domain of unknown function (DUF3350)	549	585	3.0E-10	T	2025-03-10	IPR021785	Domain of unknown function DUF3350
XP_026300482.1	7802ff0a0088cbcd88ff8b761e5edeaa	478	Pfam	PF12336	SOX transcription factor	209	293	3.5E-18	T	2025-03-10	IPR022097	Transcription factor SOX
XP_026300483.1	90c4c7a7ffda903d95d590a472449e0b	459	Pfam	PF12336	SOX transcription factor	209	293	3.6E-18	T	2025-03-10	IPR022097	Transcription factor SOX
XP_026300481.1	ff65dde615a8c2aa878b92137481e5fa	506	Pfam	PF12336	SOX transcription factor	209	293	3.8E-18	T	2025-03-10	IPR022097	Transcription factor SOX
XP_026298015.1	aa225d09235431dc0b7ca935d935058b	3564	Pfam	PF12661	Human growth factor-like EGF	2217	2237	18.0	T	2025-03-10	IPR013032	EGF-like, conserved site
XP_026298015.1	aa225d09235431dc0b7ca935d935058b	3564	Pfam	PF12661	Human growth factor-like EGF	2522	2540	200.0	T	2025-03-10	IPR013032	EGF-like, conserved site
XP_026298016.1	ddfd0987f0b0218187bdc8653b4179a6	3543	Pfam	PF12661	Human growth factor-like EGF	2217	2237	18.0	T	2025-03-10	IPR013032	EGF-like, conserved site
XP_026298016.1	ddfd0987f0b0218187bdc8653b4179a6	3543	Pfam	PF12661	Human growth factor-like EGF	2522	2540	200.0	T	2025-03-10	IPR013032	EGF-like, conserved site
XP_006568426.2	8465ffa20640fc9a339f017b9772de4c	159	Pfam	PF12689	Acid Phosphatase	8	159	2.1E-49	T	2025-03-10	IPR010036	Magnesium-dependent phosphatase-1, eukaryotic/archaeal-type
XP_026296484.1	cba561e569ac9e3468a247294cf96b76	1415	Pfam	PF12739	ER-Golgi trafficking TRAPP I complex 85 kDa subunit	26	561	3.6E-113	T	2025-03-10	IPR024420	TRAPP III complex, Trs85
XP_026296483.1	ad697a6db8215be1ea469786ccd6428f	1439	Pfam	PF12739	ER-Golgi trafficking TRAPP I complex 85 kDa subunit	26	560	4.3E-113	T	2025-03-10	IPR024420	TRAPP III complex, Trs85
XP_006571964.2	81147ddab8482e901ce72230c9b95e0c	1443	Pfam	PF12739	ER-Golgi trafficking TRAPP I complex 85 kDa subunit	26	560	4.3E-113	T	2025-03-10	IPR024420	TRAPP III complex, Trs85
XP_026301545.1	5c4ef10545bd1864e3e2fe52bb957d7d	458	Pfam	PF12796	Ankyrin repeats (3 copies)	198	281	1.1E-7	T	2025-03-10	IPR002110	Ankyrin repeat
XP_026301545.1	5c4ef10545bd1864e3e2fe52bb957d7d	458	Pfam	PF12796	Ankyrin repeats (3 copies)	62	146	4.1E-9	T	2025-03-10	IPR002110	Ankyrin repeat
XP_006557342.1	4b623da35dc8b86e93181bc470f71b67	418	Pfam	PF12796	Ankyrin repeats (3 copies)	158	241	9.8E-8	T	2025-03-10	IPR002110	Ankyrin repeat
XP_397331.2	0543ffb435093bda85e64f8c5b3bbf09	469	Pfam	PF12796	Ankyrin repeats (3 copies)	209	292	1.2E-7	T	2025-03-10	IPR002110	Ankyrin repeat
XP_397331.2	0543ffb435093bda85e64f8c5b3bbf09	469	Pfam	PF12796	Ankyrin repeats (3 copies)	73	157	4.2E-9	T	2025-03-10	IPR002110	Ankyrin repeat
XP_006567267.1	f37b16938a895d96e457b7b180ee8569	539	Pfam	PF13181	Tetratricopeptide repeat	75	104	40.0	T	2025-03-10	IPR019734	Tetratricopeptide repeat
XP_395748.2	219216aa4255514265d5d6a51e6f5106	459	Pfam	PF13181	Tetratricopeptide repeat	334	366	35.0	T	2025-03-10	IPR019734	Tetratricopeptide repeat
XP_016768023.1	219216aa4255514265d5d6a51e6f5106	459	Pfam	PF13181	Tetratricopeptide repeat	334	366	35.0	T	2025-03-10	IPR019734	Tetratricopeptide repeat
XP_006563315.1	a374478a1bc7cf0fd44871940396ee60	404	Pfam	PF13181	Tetratricopeptide repeat	334	366	30.0	T	2025-03-10	IPR019734	Tetratricopeptide repeat
XP_006567264.1	07eb7989c5efb86f96872857f4665ed0	796	Pfam	PF13374	Tetratricopeptide repeat	622	648	67.0	T	2025-03-10	-	-
XP_026298015.1	aa225d09235431dc0b7ca935d935058b	3564	Pfam	PF13385	Concanavalin A-like lectin/glucanases superfamily	2579	2726	2.0E-6	T	2025-03-10	-	-
XP_026298016.1	ddfd0987f0b0218187bdc8653b4179a6	3543	Pfam	PF13385	Concanavalin A-like lectin/glucanases superfamily	2579	2726	2.0E-6	T	2025-03-10	-	-
XP_006567267.1	f37b16938a895d96e457b7b180ee8569	539	Pfam	PF13414	TPR repeat	366	405	4.6E-6	T	2025-03-10	-	-
XP_006567267.1	f37b16938a895d96e457b7b180ee8569	539	Pfam	PF13424	Tetratricopeptide repeat	261	326	4.7E-5	T	2025-03-10	-	-
XP_006567264.1	07eb7989c5efb86f96872857f4665ed0	796	Pfam	PF13432	Tetratricopeptide repeat	514	574	2.8E-5	T	2025-03-10	-	-
XP_006567266.1	f651a60fb441394bcec6fa368e2598d4	708	Pfam	PF13432	Tetratricopeptide repeat	514	574	2.2E-5	T	2025-03-10	-	-
XP_006567263.1	cfa7af442ef7e14613aa573e4e8ecec9	818	Pfam	PF13432	Tetratricopeptide repeat	489	549	2.8E-5	T	2025-03-10	-	-
XP_392318.4	df1e4552ded25ffd6b3c1b86ca8577cb	843	Pfam	PF13432	Tetratricopeptide repeat	514	574	2.9E-5	T	2025-03-10	-	-
XP_026298578.1	425fa73ebd2477b9780fa040a1ad20ea	1377	Pfam	PF13476	AAA domain	6	218	3.0E-28	T	2025-03-10	IPR038729	Rad50/SbcC-type AAA domain
XP_026298578.1	425fa73ebd2477b9780fa040a1ad20ea	1377	Pfam	PF13558	SbcC/RAD50-like, Walker B motif	1190	1254	0.0079	T	2025-03-10	-	-
XP_395614.3	d3b614e13aec5b32a21c9761ab2b37c9	798	Pfam	PF13589	Histidine kinase-, DNA gyrase B-, and HSP90-like ATPase	102	220	5.4E-5	T	2025-03-10	-	-
XP_016769909.1	ca947b338ee7b63738386bcb2c549f93	1314	Pfam	PF13676	TIR domain	1050	1153	5.2E-6	T	2025-03-10	IPR000157	Toll/interleukin-1 receptor homology (TIR) domain
XP_397526.2	4ab833c2ebbd2db0f024b7a1c864fbc2	274	Pfam	PF13855	Leucine rich repeat	119	178	0.0049	T	2025-03-10	IPR001611	Leucine-rich repeat
XP_016769909.1	ca947b338ee7b63738386bcb2c549f93	1314	Pfam	PF13855	Leucine rich repeat	819	879	7.6E-8	T	2025-03-10	IPR001611	Leucine-rich repeat
XP_016769909.1	ca947b338ee7b63738386bcb2c549f93	1314	Pfam	PF13855	Leucine rich repeat	479	537	1.5E-9	T	2025-03-10	IPR001611	Leucine-rich repeat
XP_016769909.1	ca947b338ee7b63738386bcb2c549f93	1314	Pfam	PF13855	Leucine rich repeat	407	464	5.3E-5	T	2025-03-10	IPR001611	Leucine-rich repeat
XP_016769909.1	ca947b338ee7b63738386bcb2c549f93	1314	Pfam	PF13855	Leucine rich repeat	212	272	3.0E-10	T	2025-03-10	IPR001611	Leucine-rich repeat
XP_016769909.1	ca947b338ee7b63738386bcb2c549f93	1314	Pfam	PF13855	Leucine rich repeat	335	394	2.0E-13	T	2025-03-10	IPR001611	Leucine-rich repeat
XP_006560774.1	5fb05779f1bc973c17dbedc0e9ad67aa	880	Pfam	PF13927	Immunoglobulin domain	468	552	6.2E-4	T	2025-03-10	-	-
XP_006560774.1	5fb05779f1bc973c17dbedc0e9ad67aa	880	Pfam	PF13927	Immunoglobulin domain	173	240	8.3E-4	T	2025-03-10	-	-
XP_026296803.1	e9784f6e9b7d2d1c9e58b0f5f6346045	719	Pfam	PF13927	Immunoglobulin domain	173	240	6.4E-4	T	2025-03-10	-	-
XP_026296803.1	e9784f6e9b7d2d1c9e58b0f5f6346045	719	Pfam	PF13927	Immunoglobulin domain	468	552	4.7E-4	T	2025-03-10	-	-
XP_396311.4	16a2967d55c6b8ece912d683a02e11ec	911	Pfam	PF13927	Immunoglobulin domain	173	240	8.7E-4	T	2025-03-10	-	-
XP_396311.4	16a2967d55c6b8ece912d683a02e11ec	911	Pfam	PF13927	Immunoglobulin domain	468	552	6.5E-4	T	2025-03-10	-	-
XP_006563820.2	8cd6daa728af9e9ffdfe3a2f9e67fef2	2053	Pfam	PF13934	Nuclear pore complex assembly	722	952	5.5E-36	T	2025-03-10	IPR025151	ELYS-like domain
XP_001122084.3	9ed811b11e964b0dc6ab2c17ab3e83d1	2103	Pfam	PF13934	Nuclear pore complex assembly	722	952	5.7E-36	T	2025-03-10	IPR025151	ELYS-like domain
XP_006563821.2	478f2e97e11d871910e73f4ccfe25706	2048	Pfam	PF13934	Nuclear pore complex assembly	722	952	5.5E-36	T	2025-03-10	IPR025151	ELYS-like domain
XP_006567266.1	f651a60fb441394bcec6fa368e2598d4	708	Pfam	PF14559	Tetratricopeptide repeat	632	693	23	T	2025-03-10	-	-
XP_006567263.1	cfa7af442ef7e14613aa573e4e8ecec9	818	Pfam	PF14559	Tetratricopeptide repeat	607	668	43	T	2025-03-10	-	-
XP_392318.4	df1e4552ded25ffd6b3c1b86ca8577cb	843	Pfam	PF14559	Tetratricopeptide repeat	632	693	45	T	2025-03-10	-	-
XP_003250603.1	dcfe723d8d4e3b50e84fa0e41058ce40	164	Pfam	PF14705	Costars	63	140	2.8E-26	T	2025-03-10	IPR027817	Costars domain
XP_393850.2	0502a7a1827f4a288878e2b731eb05a6	168	Pfam	PF14705	Costars	67	144	3.0E-26	T	2025-03-10	IPR027817	Costars domain
XP_006558861.1	956f332a4098e9121c41a04685cafb71	4234	Pfam	PF15410	Pleckstrin homology domain	3805	3908	6.1E-15	T	2025-03-10	IPR041681	Pleckstrin homology domain 9
XP_006558862.1	8eac1ac5ed62e7fe682237cbe701ef08	4209	Pfam	PF15410	Pleckstrin homology domain	3805	3908	6.1E-15	T	2025-03-10	IPR041681	Pleckstrin homology domain 9
XP_026301887.1	a7e71da1adc864d29fa2efe8a6ce03a5	1785	Pfam	PF15949	Domain of unknown function (DUF4757)	51	126	9.5E-11	T	2025-03-10	IPR031865	Domain of unknown function DUF4757
XP_026301888.1	330f68b904514718c7e8af5a13decbbb	1459	Pfam	PF15949	Domain of unknown function (DUF4757)	46	126	8.0E-11	T	2025-03-10	IPR031865	Domain of unknown function DUF4757
XP_016770421.1	51febaad90b0658d9a9d543a4ca98fc2	1791	Pfam	PF15949	Domain of unknown function (DUF4757)	51	126	9.5E-11	T	2025-03-10	IPR031865	Domain of unknown function DUF4757
XP_006571084.1	a24b43274b1de7a969bd973d2ac921e9	1804	Pfam	PF15949	Domain of unknown function (DUF4757)	51	126	9.6E-11	T	2025-03-10	IPR031865	Domain of unknown function DUF4757
XP_006571085.1	a24b43274b1de7a969bd973d2ac921e9	1804	Pfam	PF15949	Domain of unknown function (DUF4757)	51	126	9.6E-11	T	2025-03-10	IPR031865	Domain of unknown function DUF4757
XP_006571083.1	a24b43274b1de7a969bd973d2ac921e9	1804	Pfam	PF15949	Domain of unknown function (DUF4757)	51	126	9.6E-11	T	2025-03-10	IPR031865	Domain of unknown function DUF4757
XP_006571086.1	a24b43274b1de7a969bd973d2ac921e9	1804	Pfam	PF15949	Domain of unknown function (DUF4757)	51	126	9.6E-11	T	2025-03-10	IPR031865	Domain of unknown function DUF4757
XP_006571087.1	a24b43274b1de7a969bd973d2ac921e9	1804	Pfam	PF15949	Domain of unknown function (DUF4757)	51	126	9.6E-11	T	2025-03-10	IPR031865	Domain of unknown function DUF4757
XP_026301886.1	8bb58b52af631b8f2af7dec2b2374aca	1801	Pfam	PF15949	Domain of unknown function (DUF4757)	51	126	9.6E-11	T	2025-03-10	IPR031865	Domain of unknown function DUF4757
XP_006569520.2	a895a4aedfb898dfcc85c81d2bc56dde	553	Pfam	PF16058	Mucin-like	92	180	8.0E-6	T	2025-03-10	IPR032059	Mucin-like domain
XP_006569520.2	a895a4aedfb898dfcc85c81d2bc56dde	553	Pfam	PF16086	Domain of unknown function (DUF4816)	297	337	2.5E-10	T	2025-03-10	IPR032134	Protein of unknown function DUF4816
XP_006569520.2	a895a4aedfb898dfcc85c81d2bc56dde	553	Pfam	PF16086	Domain of unknown function (DUF4816)	429	456	3.8E-4	T	2025-03-10	IPR032134	Protein of unknown function DUF4816
XP_006569520.2	a895a4aedfb898dfcc85c81d2bc56dde	553	Pfam	PF16086	Domain of unknown function (DUF4816)	454	493	1.8E-8	T	2025-03-10	IPR032134	Protein of unknown function DUF4816
XP_006569520.2	a895a4aedfb898dfcc85c81d2bc56dde	553	Pfam	PF16086	Domain of unknown function (DUF4816)	498	542	8.7E-8	T	2025-03-10	IPR032134	Protein of unknown function DUF4816
XP_006569520.2	a895a4aedfb898dfcc85c81d2bc56dde	553	Pfam	PF16086	Domain of unknown function (DUF4816)	475	507	6.9E-4	T	2025-03-10	IPR032134	Protein of unknown function DUF4816
XP_006569520.2	a895a4aedfb898dfcc85c81d2bc56dde	553	Pfam	PF16086	Domain of unknown function (DUF4816)	372	409	1	T	2025-03-10	IPR032134	Protein of unknown function DUF4816
XP_006569520.2	a895a4aedfb898dfcc85c81d2bc56dde	553	Pfam	PF16086	Domain of unknown function (DUF4816)	355	385	6.8E-4	T	2025-03-10	IPR032134	Protein of unknown function DUF4816
XP_026297051.1	4473d4b5e112630c665b4d521e7c854a	1279	Pfam	PF16124	RecQ zinc-binding	900	970	5.4E-14	T	2025-03-10	IPR032284	ATP-dependent DNA helicase RecQ, zinc-binding domain
XP_026297050.1	540199baa76f27aedf7d11201377a235	1348	Pfam	PF16124	RecQ zinc-binding	969	1039	5.7E-14	T	2025-03-10	IPR032284	ATP-dependent DNA helicase RecQ, zinc-binding domain
XP_026300177.1	9c31e23877456fa506441fcb0fda01b4	1060	Pfam	PF16178	Anoctamin, dimerisation domain	173	406	1.8E-66	T	2025-03-10	IPR032394	Anoctamin, dimerisation domain
XP_026300178.1	9c31e23877456fa506441fcb0fda01b4	1060	Pfam	PF16178	Anoctamin, dimerisation domain	173	406	1.8E-66	T	2025-03-10	IPR032394	Anoctamin, dimerisation domain
XP_026300180.1	6a514226251f036c0536816ab3fa1c3b	1014	Pfam	PF16178	Anoctamin, dimerisation domain	173	406	1.6E-66	T	2025-03-10	IPR032394	Anoctamin, dimerisation domain
XP_026300179.1	9ba18f61dc98d25e8a15f840c25597fb	1055	Pfam	PF16178	Anoctamin, dimerisation domain	168	401	1.8E-66	T	2025-03-10	IPR032394	Anoctamin, dimerisation domain
XP_016768669.1	6c360c2a5c06df82d372d96e1ee2eaee	440	Pfam	PF16676	Transactivation domain of FOXO protein family	347	383	6.3E-5	T	2025-03-10	IPR032067	FOXO protein, transactivation domain
XP_026297786.1	eb7010c5de5542d26896b708f2dc0fdc	556	Pfam	PF16676	Transactivation domain of FOXO protein family	463	499	8.5E-5	T	2025-03-10	IPR032067	FOXO protein, transactivation domain
XP_016768670.1	eb7010c5de5542d26896b708f2dc0fdc	556	Pfam	PF16676	Transactivation domain of FOXO protein family	463	499	8.5E-5	T	2025-03-10	IPR032067	FOXO protein, transactivation domain
XP_001122084.3	9ed811b11e964b0dc6ab2c17ab3e83d1	2103	Pfam	PF16687	beta-propeller of ELYS nucleoporin	59	356	0.0025	T	2025-03-10	IPR032040	ELYS, beta-propeller domain
XP_006563821.2	478f2e97e11d871910e73f4ccfe25706	2048	Pfam	PF16687	beta-propeller of ELYS nucleoporin	59	356	0.0024	T	2025-03-10	IPR032040	ELYS, beta-propeller domain
XP_006567267.1	f37b16938a895d96e457b7b180ee8569	539	Pfam	PF17830	STI1/HOP, DP domain	129	182	3.1E-12	T	2025-03-10	IPR041243	STI1/HOP, DP domain
XP_006567267.1	f37b16938a895d96e457b7b180ee8569	539	Pfam	PF17830	STI1/HOP, DP domain	479	531	2.0E-11	T	2025-03-10	IPR041243	STI1/HOP, DP domain
XP_016769783.2	a84f7952936db55693d673f45d4489f4	1563	Pfam	PF18400	Thioredoxin-like domain	84	261	4.2E-44	T	2025-03-10	IPR040693	UGGT, thioredoxin-like domain 1
XP_026299043.1	0404ed3f91f8cb12516dfaa5e0070eaf	1255	Pfam	PF18400	Thioredoxin-like domain	84	261	3.1E-44	T	2025-03-10	IPR040693	UGGT, thioredoxin-like domain 1
XP_016769783.2	a84f7952936db55693d673f45d4489f4	1563	Pfam	PF18401	Thioredoxin-like domain	336	467	1.5E-32	T	2025-03-10	IPR040694	UGGT, thioredoxin-like domain 2
XP_026299043.1	0404ed3f91f8cb12516dfaa5e0070eaf	1255	Pfam	PF18401	Thioredoxin-like domain	336	467	1.1E-32	T	2025-03-10	IPR040694	UGGT, thioredoxin-like domain 2
XP_016769783.2	a84f7952936db55693d673f45d4489f4	1563	Pfam	PF18402	Thioredoxin-like domain	477	724	5.6E-59	T	2025-03-10	IPR040692	UGGT, thioredoxin-like domain 3
XP_026299043.1	0404ed3f91f8cb12516dfaa5e0070eaf	1255	Pfam	PF18402	Thioredoxin-like domain	477	724	3.9E-59	T	2025-03-10	IPR040692	UGGT, thioredoxin-like domain 3
XP_016769783.2	a84f7952936db55693d673f45d4489f4	1563	Pfam	PF18403	Thioredoxin-like domain	754	969	7.3E-39	T	2025-03-10	IPR040525	UDP-glucose:glycoprotein glucosyltransferase, thioredoxin-like domain 4
XP_026299043.1	0404ed3f91f8cb12516dfaa5e0070eaf	1255	Pfam	PF18403	Thioredoxin-like domain	754	969	5.2E-39	T	2025-03-10	IPR040525	UDP-glucose:glycoprotein glucosyltransferase, thioredoxin-like domain 4
XP_016769783.2	a84f7952936db55693d673f45d4489f4	1563	Pfam	PF18404	Glucosyltransferase 24	1265	1532	1.0E-142	T	2025-03-10	IPR040497	Glucosyltransferase 24, catalytic domain
NP_001116485.2	4a92752bb544ee463900e696e10df459	1952	Pfam	PF20930	Dicer, partner-binding domain	234	340	2.9E-5	T	2025-03-10	IPR048513	Dicer, partner-binding domain
XP_016767546.1	4a92752bb544ee463900e696e10df459	1952	Pfam	PF20930	Dicer, partner-binding domain	234	340	2.9E-5	T	2025-03-10	IPR048513	Dicer, partner-binding domain
NP_001116485.2	4a92752bb544ee463900e696e10df459	1952	Pfam	PF20931	Dicer, platform domain	769	884	1.7E-32	T	2025-03-10	IPR048512	Dicer, platform domain
XP_016767546.1	4a92752bb544ee463900e696e10df459	1952	Pfam	PF20931	Dicer, platform domain	769	884	1.7E-32	T	2025-03-10	IPR048512	Dicer, platform domain
NP_001116485.2	4a92752bb544ee463900e696e10df459	1952	Pfam	PF20932	Dicer, dsRNA-binding domain	1858	1946	1.7E-34	T	2025-03-10	IPR044441	Dicer, double-stranded RNA-binding domain
XP_016767546.1	4a92752bb544ee463900e696e10df459	1952	Pfam	PF20932	Dicer, dsRNA-binding domain	1858	1946	1.7E-34	T	2025-03-10	IPR044441	Dicer, double-stranded RNA-binding domain
XP_026301491.1	77c43cc87cd8a194a562ac905fd877d9	1567	Pfam	PF20974	tRNA synthetases class I (E and Q), anti-codon binding domain	640	705	5.6E-5	T	2025-03-10	IPR049437	tRNA synthetases class I (E and Q), anti-codon binding domain
XP_016766676.2	cbab2efbaafcd5ba25babd2bcec1849b	389	Pfam	PF20979	Arginosuccinate synthase C-terminal domain	157	379	5.4E-74	T	2025-03-10	IPR048268	Arginosuccinate synthase C-terminal domain
XP_396374.3	e4d2343bc5a8bfd9a94654ed97636411	412	Pfam	PF20979	Arginosuccinate synthase C-terminal domain	180	402	6.3E-74	T	2025-03-10	IPR048268	Arginosuccinate synthase C-terminal domain
XP_026297842.1	515aaaf50d4c150228aee23dfd3de902	881	Pfam	PF21050	LisH domain-containing protein ARMC9, ARM repeats	590	707	1.2E-31	T	2025-03-10	IPR048959	LisH domain-containing protein ARMC9, ARM repeat domain
XP_026297841.1	db2ff4d14fc23579a1d462a6b1141cc7	927	Pfam	PF21050	LisH domain-containing protein ARMC9, ARM repeats	590	707	1.3E-31	T	2025-03-10	IPR048959	LisH domain-containing protein ARMC9, ARM repeat domain
XP_026297840.1	2baba679779d557f4f54c44b6d3ea84f	964	Pfam	PF21050	LisH domain-containing protein ARMC9, ARM repeats	590	707	1.4E-31	T	2025-03-10	IPR048959	LisH domain-containing protein ARMC9, ARM repeat domain
XP_026297843.1	f3a2ae7ea74705cfe0f9c5ca4920b6c2	844	Pfam	PF21050	LisH domain-containing protein ARMC9, ARM repeats	590	707	1.1E-31	T	2025-03-10	IPR048959	LisH domain-containing protein ARMC9, ARM repeat domain
NP_001229927.1	7d158a9924eea484fa4ecf5b5498dc56	424	Pfam	PF21700	Delta-like/Jagged, EGF-like domain	196	220	5.9E-6	T	2025-03-10	-	-
NP_001229927.1	7d158a9924eea484fa4ecf5b5498dc56	424	Pfam	PF21700	Delta-like/Jagged, EGF-like domain	133	156	7.3E-5	T	2025-03-10	-	-
NP_001229927.1	7d158a9924eea484fa4ecf5b5498dc56	424	Pfam	PF21700	Delta-like/Jagged, EGF-like domain	260	285	2.9E-8	T	2025-03-10	-	-

## Sheet: Primers
Gene	F/R	secuence
DWV-A	F	TATCTTCATTAAAGCCACCTGGAA	Virus
	R	TTTCCTCATTAACTGTGTCGTTGAT
Arp1	F	ATGCCAACACTGTCCTTTCTGG	housekeeping 1
	R	GACCCACCAATCCATACGGA
18rps	F	GATTCCCGATTGGTTTTTGAATAG	housekeeping 2
	R	AACCCCAATAATGACGCAAACC
AmNeto	F	ATCAGAGGCGACCTTTCAGC	Neto (LOC411019)
	R	TGACAGTTTGACGGGGATGG
AmKainate	F	TGCTTCCTCCCGACAATGAC	Kainate (LOC102653800)
	R	AGCAATCCCGTAACCCTTGG
AmEaat-2	F	TTATCGCGGCGCTCATTCTT	Eaat-2 (LOC406113)
	R	TCCTCTTACGTGCAACACAGG
